# Supplementary material
Source: bioRxiv or medRxiv preprint supplement (https://www.biorxiv.org/highwire/filestream/4383/field_highwire_adjunct_files/0/017269-1.pdf)
Supplement: Supplementary file [file 017269-1.pdf]

# Systematic searching of U2 candidates

U2 GGAUCCCUCA CUUACUAGUC UGCAGAAGGA GAUAUACCCA UGG

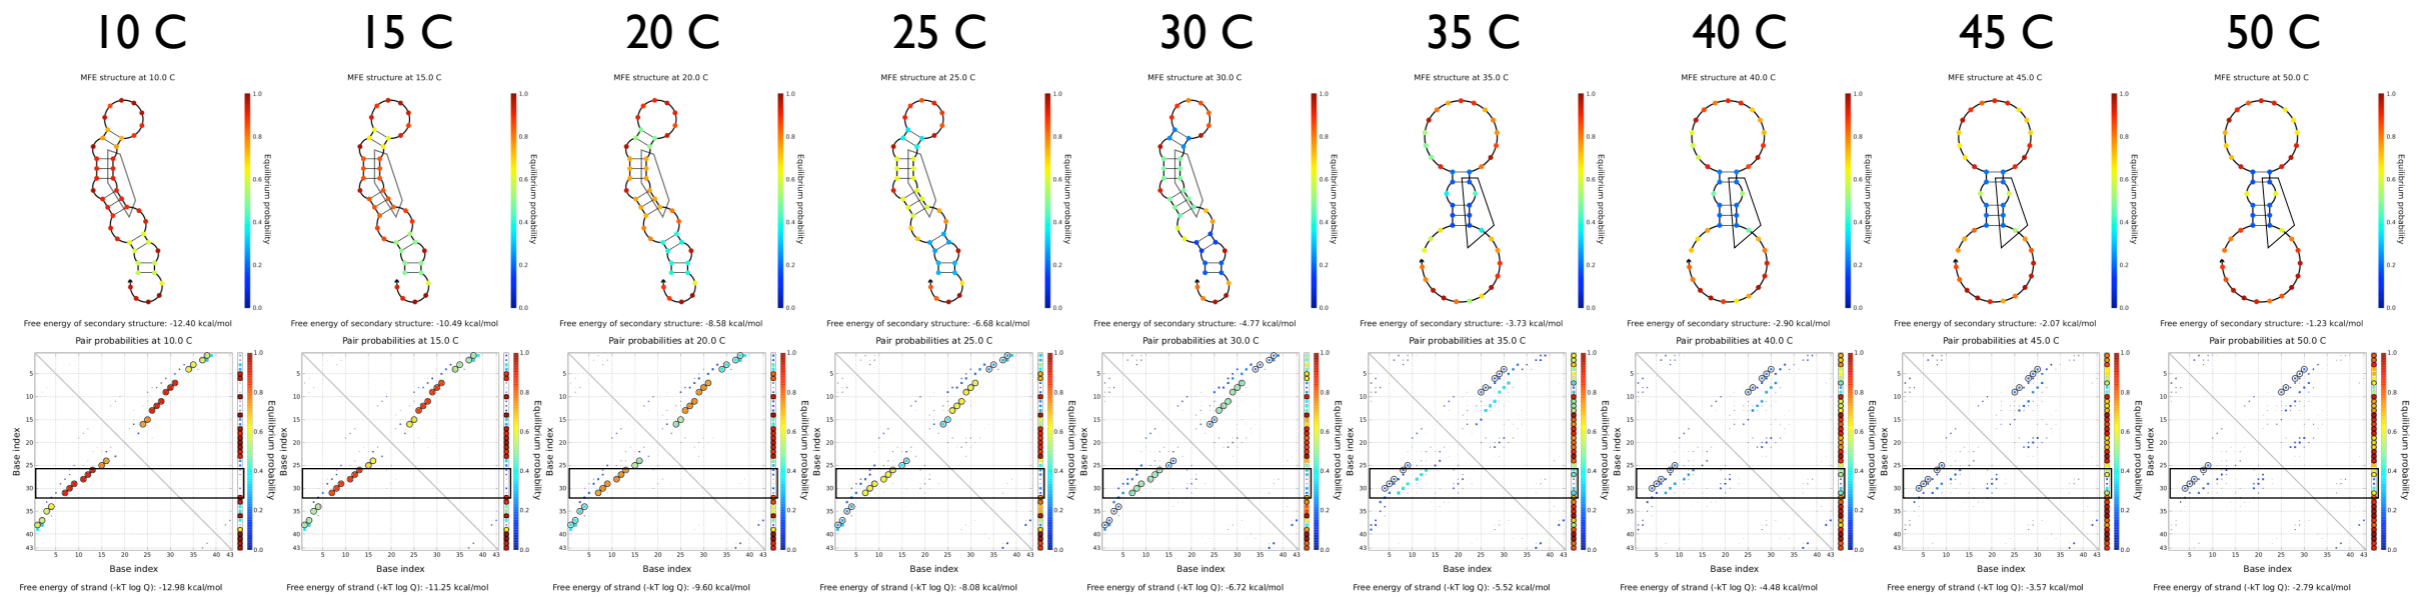

Base pairs involved in doe sort of structure are 1, 2, 3, 4, 7, 8, 9, 11, 12, 13, 15, 16, 24, 25, 34, 35, 37, 38

Overall, 18 bp.

So do  $18 \times (5 - 1) = 72$  calculations

Naming convention

U2<basepair#><identity of base pair = A, G, U, C or 0>

Save melt curves and everything else

| S. No. | Name | Sequence                                                                            |
|--------|------|-------------------------------------------------------------------------------------|
| 0      | U2   | <u>GGAUCCCUCA</u> <u>CUUACUAGUC</u> UGC <u>AGAAGGA</u> <u>GAUAUACCCA</u> <u>UGG</u> |
| 1      | U210 | GAUCCCUCA CUUACUAGUC UGCAGA <u>AAGGA</u> <u>GAUAUACCCA</u> <u>UGG</u>               |
| 2      | U21A | <u>A</u> GAUCCCUCA CUUACUAGUC UGCAGA <u>AAGGA</u> <u>GAUAUACCCA</u> <u>UGG</u>      |
| 3      | U21C | <u>C</u> GAUCCCUCA CUUACUAGUC UGCAGA <u>AAGGA</u> <u>GAUAUACCCA</u> <u>UGG</u>      |
| 4      | U21U | <u>U</u> GAUCCCUCA CUUACUAGUC UGCAGA <u>AAGGA</u> <u>GAUAUACCCA</u> <u>UGG</u>      |
| 5      | U220 | G AUCCCUCA CUUACUAGUC UGCAGA <u>AAGGA</u> <u>GAUAUACCCA</u> <u>UGG</u>              |
| 6      | U22A | <u>G</u> AUCCCUCA CUUACUAGUC UGCAGA <u>AAGGA</u> <u>GAUAUACCCA</u> <u>UGG</u>       |
| 7      | U22C | <u>G</u> CAUCCCUCA CUUACUAGUC UGCAGA <u>AAGGA</u> <u>GAUAUACCCA</u> <u>UGG</u>      |
| 8      | U22U | <u>G</u> UAUCCCUCA CUUACUAGUC UGCAGA <u>AAGGA</u> <u>GAUAUACCCA</u> <u>UGG</u>      |
| 9      | U230 | GG UCCCUCA CUUACUAGUC UGCAGA <u>AAGGA</u> <u>GAUAUACCCA</u> <u>UGG</u>              |
| 10     | U23C | GG <u>C</u> UCCCUCA CUUACUAGUC UGCAGA <u>AAGGA</u> <u>GAUAUACCCA</u> <u>UGG</u>     |
| 11     | U23G | GG <u>G</u> UCCCUCA CUUACUAGUC UGCAGA <u>AAGGA</u> <u>GAUAUACCCA</u> <u>UGG</u>     |
| 12     | U23U | GG <u>U</u> UCCCUCA CUUACUAGUC UGCAGA <u>AAGGA</u> <u>GAUAUACCCA</u> <u>UGG</u>     |
| 13     | U240 | GGA CCCUCA CUUACUAGUC UGCAGA <u>AAGGA</u> <u>GAUAUACCCA</u> <u>UGG</u>              |
| 14     | U24A | GGA <u>A</u> CCCUCA CUUACUAGUC UGCAGA <u>AAGGA</u> <u>GAUAUACCCA</u> <u>UGG</u>     |
| 15     | U24C | GG <u>A</u> CCCUCA CUUACUAGUC UGCAGA <u>AAGGA</u> <u>GAUAUACCCA</u> <u>UGG</u>      |
| 16     | U24G | GG <u>G</u> CCCUCA CUUACUAGUC UGCAGA <u>AAGGA</u> <u>GAUAUACCCA</u> <u>UGG</u>      |

| S. No. | Name  | Sequence                                         |
|--------|-------|--------------------------------------------------|
| 0      | U2    | GGAUCCCUCA CUUACUAGUC UGCAGAAAGGA GAUAUACCCA UGG |
| 17     | U270  | GGAUCC UCA CUUACUAGUC UGCAGAAAGGA GAUAUACCCA UGG |
| 18     | U27A  | GGAUCCAUCA CUUACUAGUC UGCAGAAAGGA GAUAUACCCA UGG |
| 19     | U27G  | GGAUCCGUCA CUUACUAGUC UGCAGAAAGGA GAUAUACCCA UGG |
| 20     | U27U  | GGAUCCUUCA CUUACUAGUC UGCAGAAAGGA GAUAUACCCA UGG |
| 21     | U280  | GGAUCCC CA CUUACUAGUC UGCAGAAAGGA GAUAUACCCA UGG |
| 22     | U28A  | GGAUCCCACA CUUACUAGUC UGCAGAAAGGA GAUAUACCCA UGG |
| 23     | U28C  | GGAUCCCCCA CUUACUAGUC UGCAGAAAGGA GAUAUACCCA UGG |
| 24     | U28G  | GGAUCCCGCA CUUACUAGUC UGCAGAAAGGA GAUAUACCCA UGG |
| 25     | U290  | GGAUCCCU A CUUACUAGUC UGCAGAAAGGA GAUAUACCCA UGG |
| 26     | U29A  | GGAUCCCUAA CUUACUAGUC UGCAGAAAGGA GAUAUACCCA UGG |
| 27     | U29G  | GGAUCCCUGA CUUACUAGUC UGCAGAAAGGA GAUAUACCCA UGG |
| 28     | U29U  | GGAUCCCUUA CUUACUAGUC UGCAGAAAGGA GAUAUACCCA UGG |
| 29     | U2110 | GGAUCCCUCA UUACUAGUC UGCAGAAAGGA GAUAUACCCA UGG  |
| 30     | U211A | GGAUCCCUCA AUUACUAGUC UGCAGAAAGGA GAUAUACCCA UGG |
| 31     | U211G | GGAUCCCUCA GUUACUAGUC UGCAGAAAGGA GAUAUACCCA UGG |
| 32     | U211U | GGAUCCCUCA UUUACUAGUC UGCAGAAAGGA GAUAUACCCA UGG |

| S. No. | Name  | Sequence                                                         |
|--------|-------|------------------------------------------------------------------|
| 0      | U2    | GGAUCCCUCA CUUACUAGUC UGCAG <u>AAGGA</u> GAUAUACCCA UGG          |
| 33     | U2120 | GGAUCCCUCA C UACUAGUC UGCAG <u>AAGGA</u> GAUAUACCCA UGG          |
| 34     | U212A | GGAUCCCUCA CAUACUAGUC UGCAG <u>AAGGA</u> GAUAUACCCA UGG          |
| 35     | U212C | GGAUCCCUCA CCUACUAGUC UGCAG <u>AAGGA</u> GAUAUACCCA UGG          |
| 36     | U212G | GGAUCCCUCA CGUACUAGUC UGCAG <u>AAGGA</u> GAUAUACCCA UGG          |
| 37     | U2130 | GGAUCCCUCA CU ACUAGUC UGCAG <u>AAGGA</u> GAUAUACCCA UGG          |
| 38     | U213A | GGAUCCCUCA CUAACUAGUC UGCAG <u>AAGGA</u> GAUAUACCCA UGG          |
| 39     | U213C | GGAUCCCUCA CUCACUAGUC UGCAG <u>AAGGA</u> GAUAUACCCA UGG          |
| 40     | U213G | GGAUCCCUCA CUGACUAGUC UGCAG <u>AAGGA</u> GAUAUACCCA UGG          |
| 41     | U2150 | GGAUCCCUCA CUUA UAGUC UGCAG <u>AAGGA</u> GAUAUACCCA UGG          |
| 42     | U215A | GGAUCCCUCA CUUA <u>A</u> UAGUC UGCAG <u>AAGGA</u> GAUAUACCCA UGG |
| 43     | U215G | GGAUCCCUCA CUUA <u>G</u> UAGUC UGCAG <u>AAGGA</u> GAUAUACCCA UGG |
| 44     | U215U | GGAUCCCUCA CUUA <u>U</u> UAGUC UGCAG <u>AAGGA</u> GAUAUACCCA UGG |
| 45     | U2160 | GGAUCCCUCA CUUAC AGUC UGCAG <u>AAGGA</u> GAUAUACCCA UGG          |
| 46     | U216A | GGAUCCCUCA CUUAC <u>A</u> AGUC UGCAG <u>AAGGA</u> GAUAUACCCA UGG |
| 47     | U216C | GGAUCCCUCA CUUAC <u>C</u> AGUC UGCAG <u>AAGGA</u> GAUAUACCCA UGG |
| 48     | U216G | GGAUCCCUCA CUUAC <u>G</u> AGUC UGCAG <u>AAGGA</u> GAUAUACCCA UGG |

| S. No. | Name  | Sequence                                                                       |
|--------|-------|--------------------------------------------------------------------------------|
| 0      | U2    | GGAUCCCUCA CUUACUAGUC UGCAG <u>AAGGA</u> GAU <u>AUACCCA</u> <u>UGG</u>         |
| 49     | U2240 | GGAUCCCUCA CUUACUAGUC UGC <u>GAAGGA</u> GAU <u>AUACCCA</u> <u>UGG</u>          |
| 50     | U224C | GGAUCCCUCA CUUACUAGUC UGC <u>C</u> <u>GAAGGA</u> GAU <u>AUACCCA</u> <u>UGG</u> |
| 51     | U224G | GGAUCCCUCA CUUACUAGUC UGC <u>G</u> <u>GAAGGA</u> GAU <u>AUACCCA</u> <u>UGG</u> |
| 52     | U224U | GGAUCCCUCA CUUACUAGUC UGC <u>U</u> <u>GAAGGA</u> GAU <u>AUACCCA</u> <u>UGG</u> |
| 53     | U2250 | GGAUCCCUCA CUUACUAGUC UGCA <u>AAGGA</u> GAU <u>AUACCCA</u> <u>UGG</u>          |
| 54     | U225A | GGAUCCCUCA CUUACUAGUC UGCA <u>A</u> <u>AAGGA</u> GAU <u>AUACCCA</u> <u>UGG</u> |
| 55     | U225C | GGAUCCCUCA CUUACUAGUC UGCA <u>C</u> <u>AAGGA</u> GAU <u>AUACCCA</u> <u>UGG</u> |
| 56     | U225U | GGAUCCCUCA CUUACUAGUC UGCA <u>U</u> <u>AAGGA</u> GAU <u>AUACCCA</u> <u>UGG</u> |
| 57     | U2340 | GGAUCCCUCA CUUACUAGUC UGCAG <u>AAGGA</u> GAU <u>UACCCA</u> <u>UGG</u>          |
| 58     | U234C | GGAUCCCUCA CUUACUAGUC UGCAG <u>AAGGA</u> GAU <u>C</u> <u>UACCCA</u> <u>UGG</u> |
| 59     | U234G | GGAUCCCUCA CUUACUAGUC UGCAG <u>AAGGA</u> GAU <u>G</u> <u>UACCCA</u> <u>UGG</u> |
| 60     | U234U | GGAUCCCUCA CUUACUAGUC UGCAG <u>AAGGA</u> GAU <u>U</u> <u>UACCCA</u> <u>UGG</u> |
| 61     | U2350 | GGAUCCCUCA CUUACUAGUC UGCAG <u>AAGGA</u> GAUA <u>ACCCA</u> <u>UGG</u>          |
| 62     | U235A | GGAUCCCUCA CUUACUAGUC UGCAG <u>AAGGA</u> GAUA <u>A</u> <u>ACCCA</u> <u>UGG</u> |
| 63     | U235C | GGAUCCCUCA CUUACUAGUC UGCAG <u>AAGGA</u> GAUA <u>C</u> <u>ACCCA</u> <u>UGG</u> |
| 64     | U235G | GGAUCCCUCA CUUACUAGUC UGCAG <u>AAGGA</u> GAUA <u>G</u> <u>ACCCA</u> <u>UGG</u> |

| S. No. | Name  | Sequence                                        |
|--------|-------|-------------------------------------------------|
| 0      | U2    | GGAUCCCUCA CUUACUAGUC UGCAGAAGGA GAUAUACCA UGG  |
| 65     | U2370 | GGAUCCCUCA CUUACUAGUC UGCAGAAGGA GAUAUA CCA UGG |
| 66     | U237A | GGAUCCCUCA CUUACUAGUC UGCAGAAGGA GAUAUAACCA UGG |
| 67     | U237G | GGAUCCCUCA CUUACUAGUC UGCAGAAGGA GAUAUAGCCA UGG |
| 68     | U237U | GGAUCCCUCA CUUACUAGUC UGCAGAAGGA GAUAUAUCCA UGG |
| 69     | U2380 | GGAUCCCUCA CUUACUAGUC UGCAGAAGGA GAUAUAC CA UGG |
| 70     | U238A | GGAUCCCUCA CUUACUAGUC UGCAGAAGGA GAUAUACACA UGG |
| 71     | U238G | GGAUCCCUCA CUUACUAGUC UGCAGAAGGA GAUAUACGCA UGG |
| 72     | U238U | GGAUCCCUCA CUUACUAGUC UGCAGAAGGA GAUAUACUCA UGG |

| S. No. | Name  | Sequence                                          |
|--------|-------|---------------------------------------------------|
| 0      | U2    | GGAUCCCUCA CUUACUAGUC UGCAGAAGGA GAUAUACCA UGG    |
| 65     | U2370 | GGAUCCCUCA CUUACUAGUC UGCAGAAGGA GAUAUA CCA UGG   |
| 66     | U237A | GGAUCCCUCA CUUACUAGUC UGCAGAAGGA GAUAUAACCA UGG   |
| 67     | U237G | GGAUCCCUCA CUUACUAGUC UGCAGAAGGA GAUAUAGCCA UGG   |
| 68     | U237U | GGAUCCCUCA CUUACUAGUC UGCAGAAGGA GAUAUAUCCA UGG   |
| 69     | U2380 | GGAUCCCUCA CUUACUAGUC UGCAGAAGGA GAUAUAC CA UGG   |
| 70     | U238A | GGAUCCCUCA CUUACUAGUC UGCAGAAGGA GAUAUACACA UGG   |
| 71     | U238G | GGAUCCCUCA CUUACUAGUC UGCAGAAGGA GAUAUACGCA UGG   |
| 72     | U238U | GGAUCCCUCA CUUACUAGUC UGCAGAAGGA GAUAUACUCA UGG   |
| 73     | U2100 | GGAUCCCUCC CUUACUAGUC UGCAGAAGGA GAUAUACUCA UGG   |
| 74     | U210C | GGAUCCCUCC C CUUACUAGUC UGCAGAAGGA GAUAUACUCA UGG |
| 75     | U210G | GGAUCCCUCC G CUUACUAGUC UGCAGAAGGA GAUAUACUCA UGG |
| 76     | U210U | GGAUCCCUCC U CUUACUAGUC UGCAGAAGGA GAUAUACUCA UGG |

# U2 all

Red curve corresponds to U2, rest are in black

MFE structure at 0.0 C

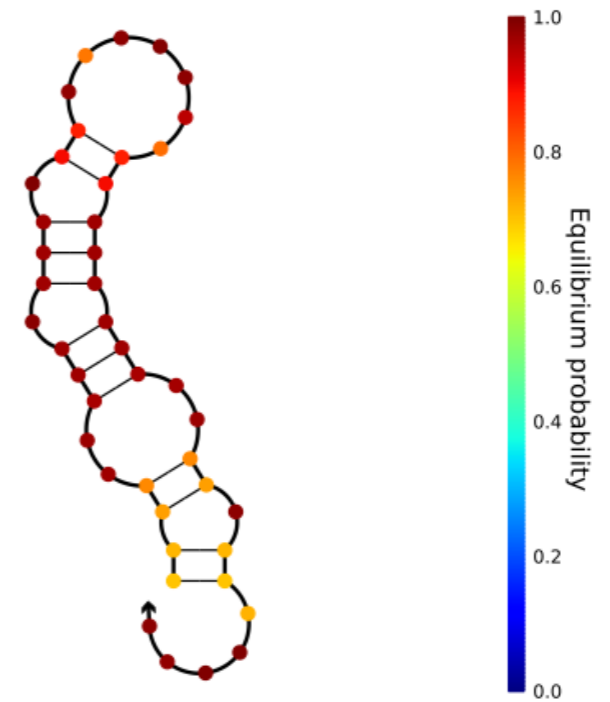

Free energy of secondary structure: -16.21 kcal/mol

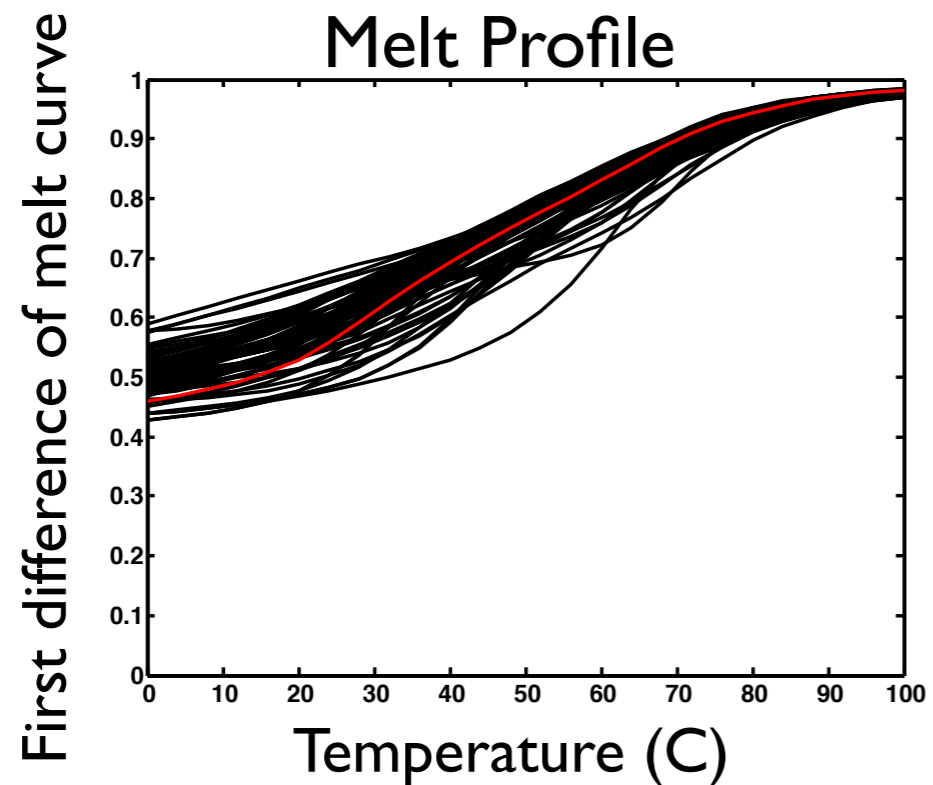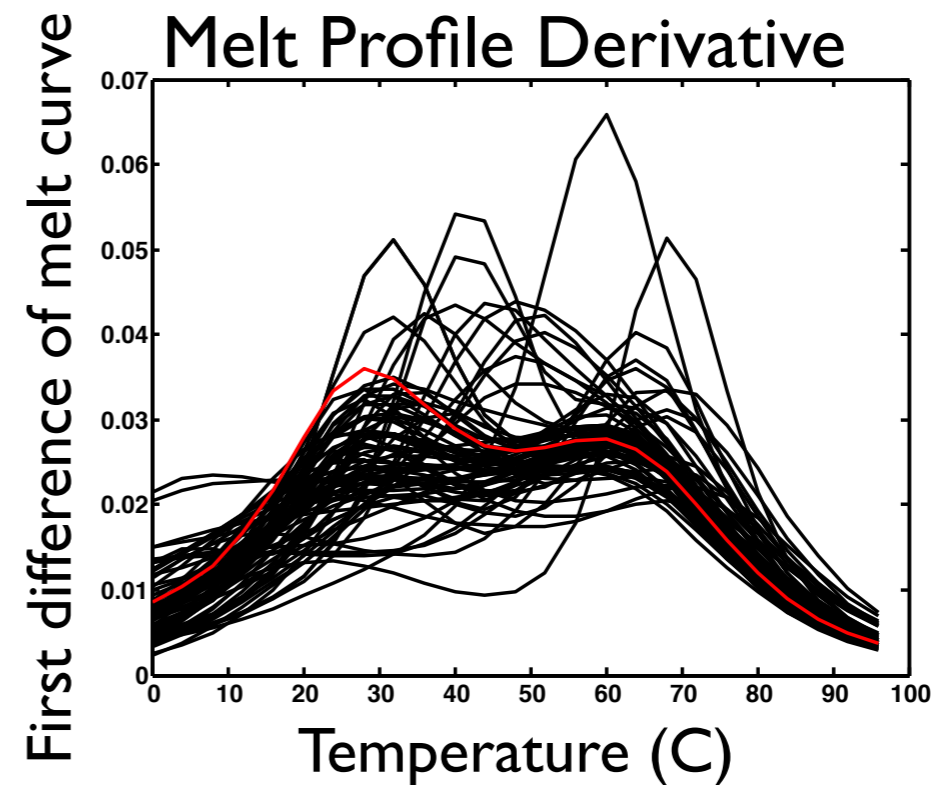



# U210

Different - Linear

MFE structure at 0.0 C

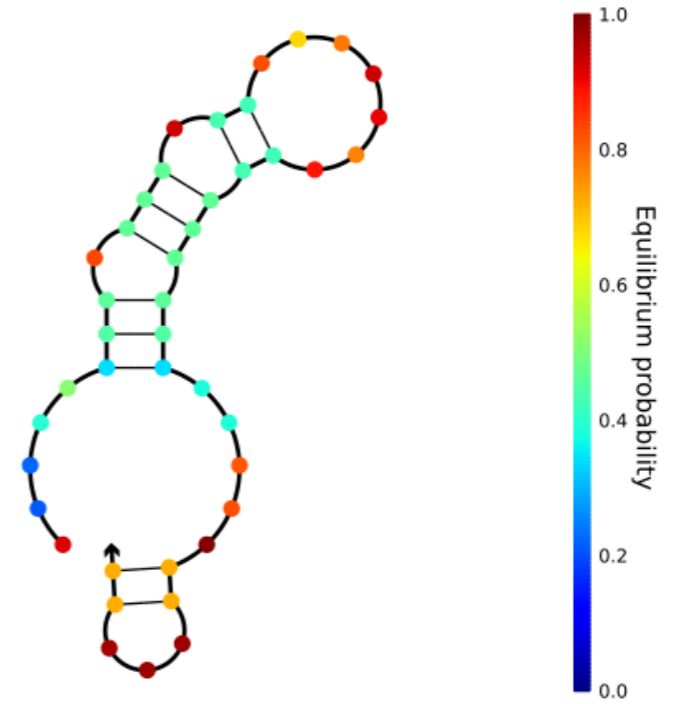

Free energy of secondary structure: -13.06 kcal/mol

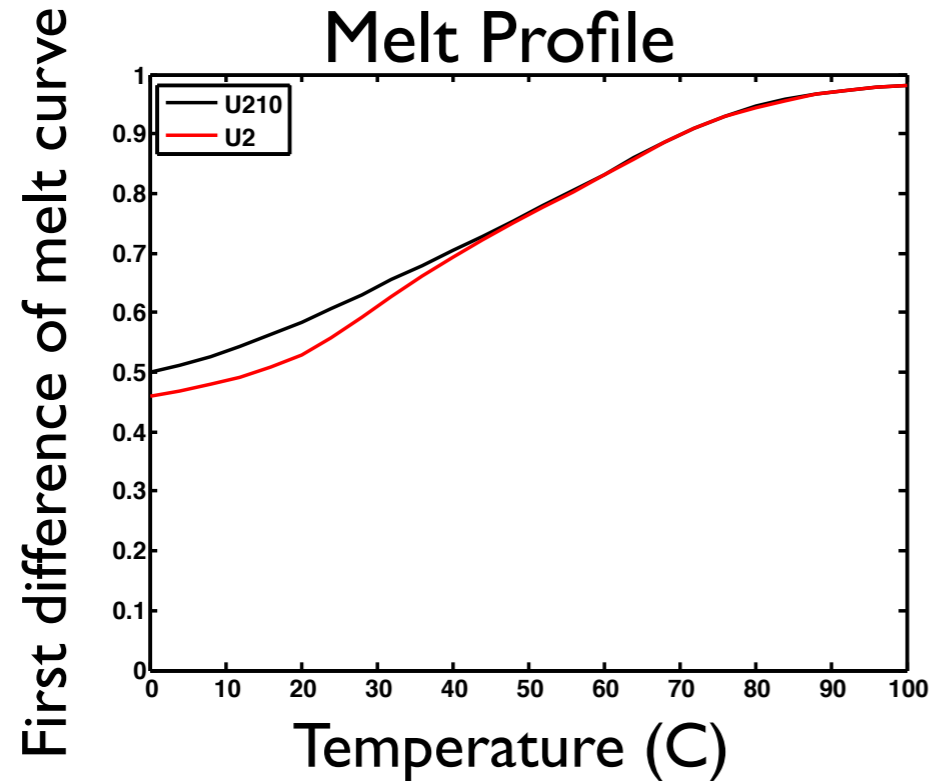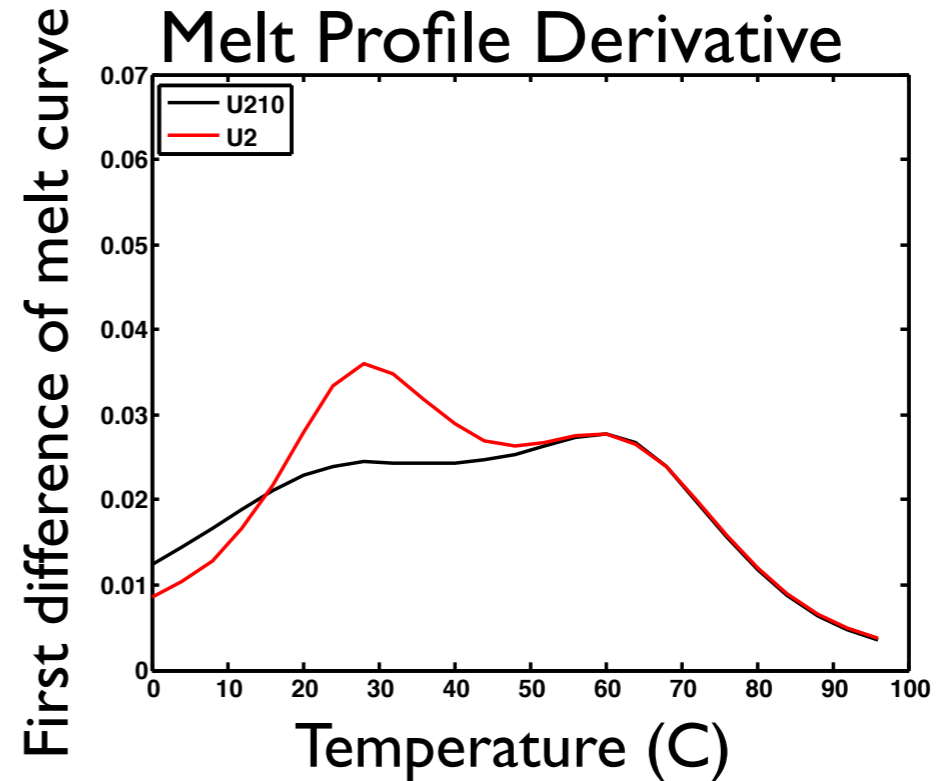

# U21A

Different - Linear

MFE structure at 0.0 C

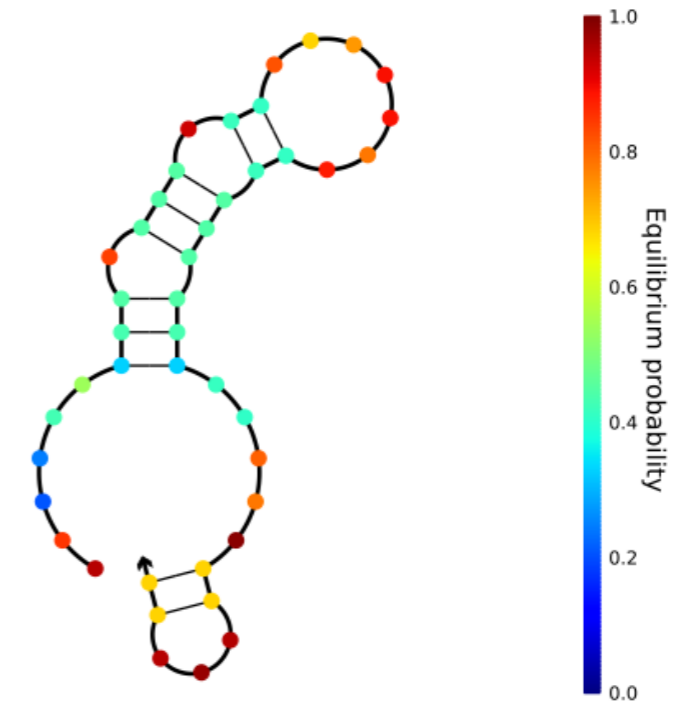

Free energy of secondary structure: -13.06 kcal/mol

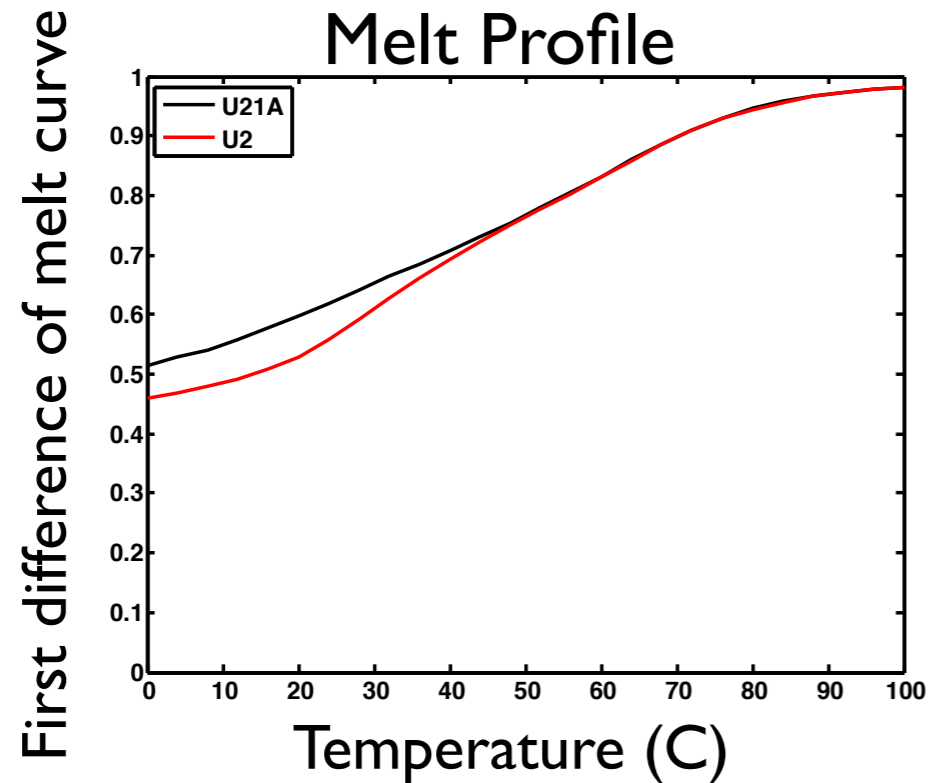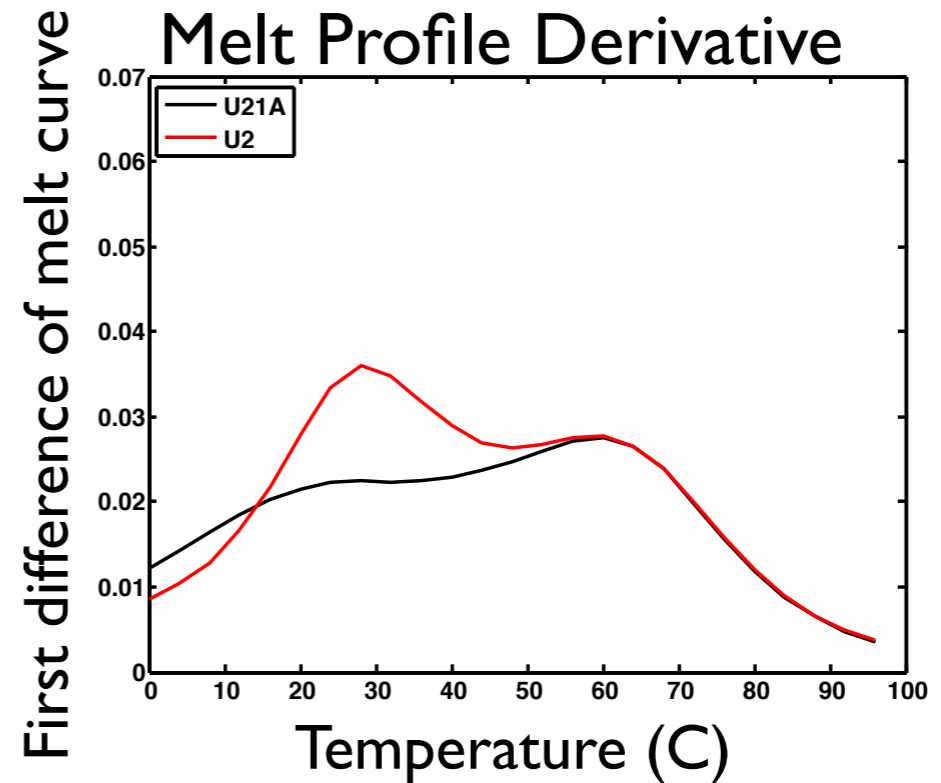

# U21C

Different - Linear

MFE structure at 0.0 C

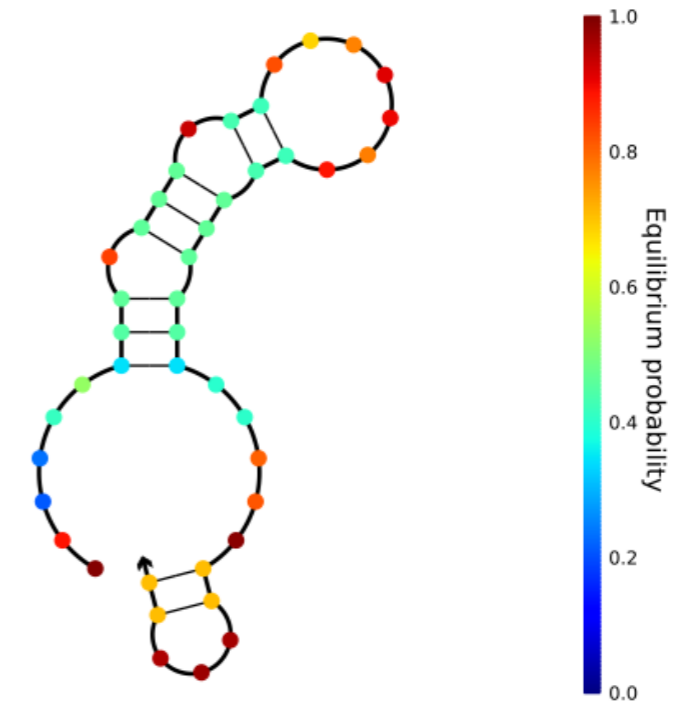

Free energy of secondary structure: -13.06 kcal/mol

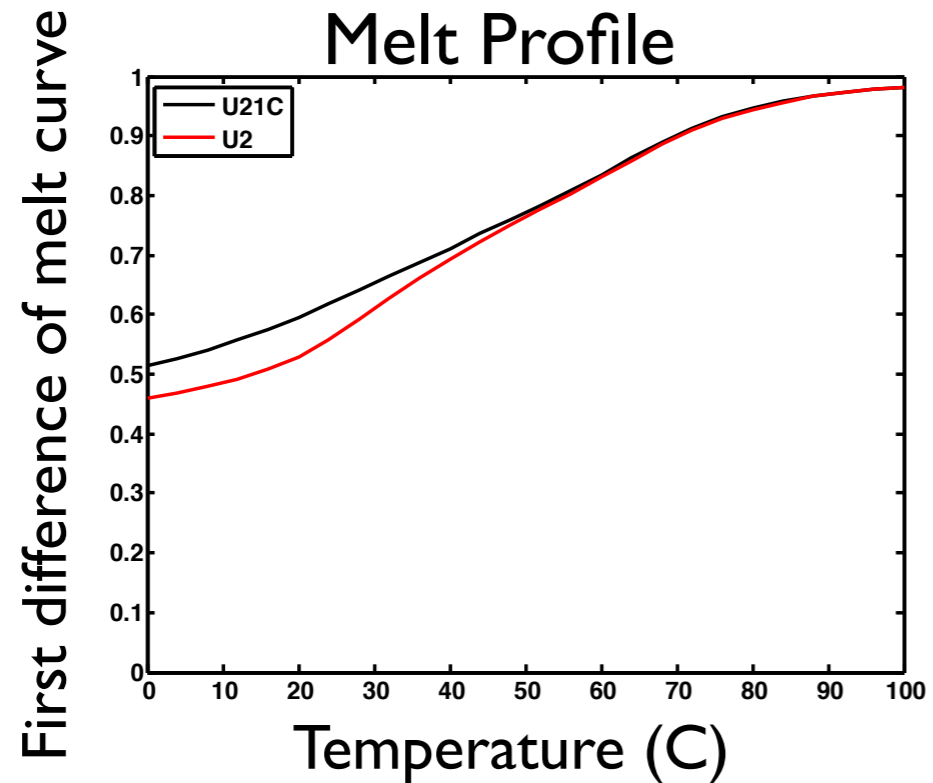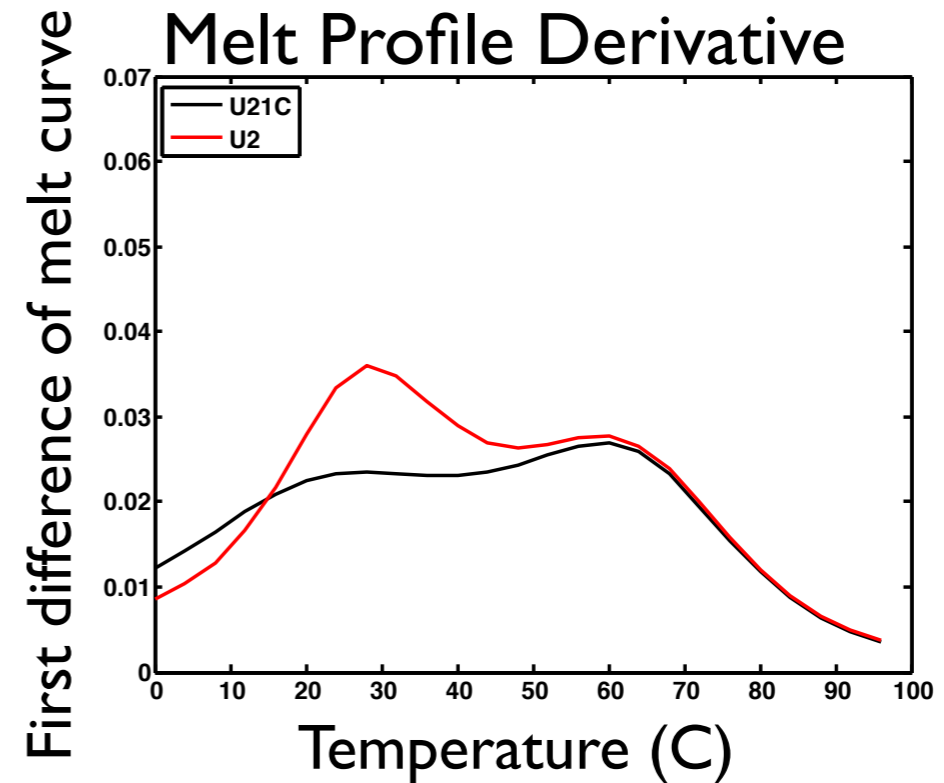

# U21U

Different - Linear

MFE structure at 0.0 C

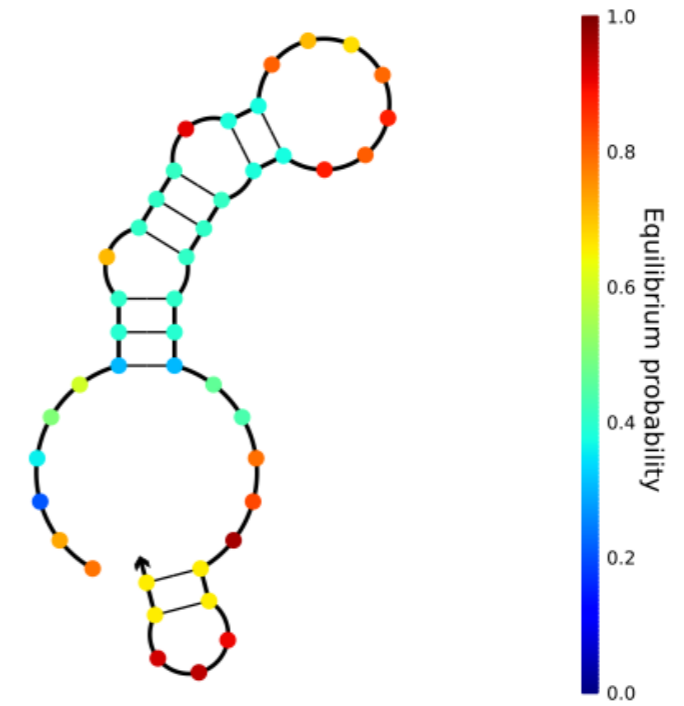

Free energy of secondary structure: -13.06 kcal/mol

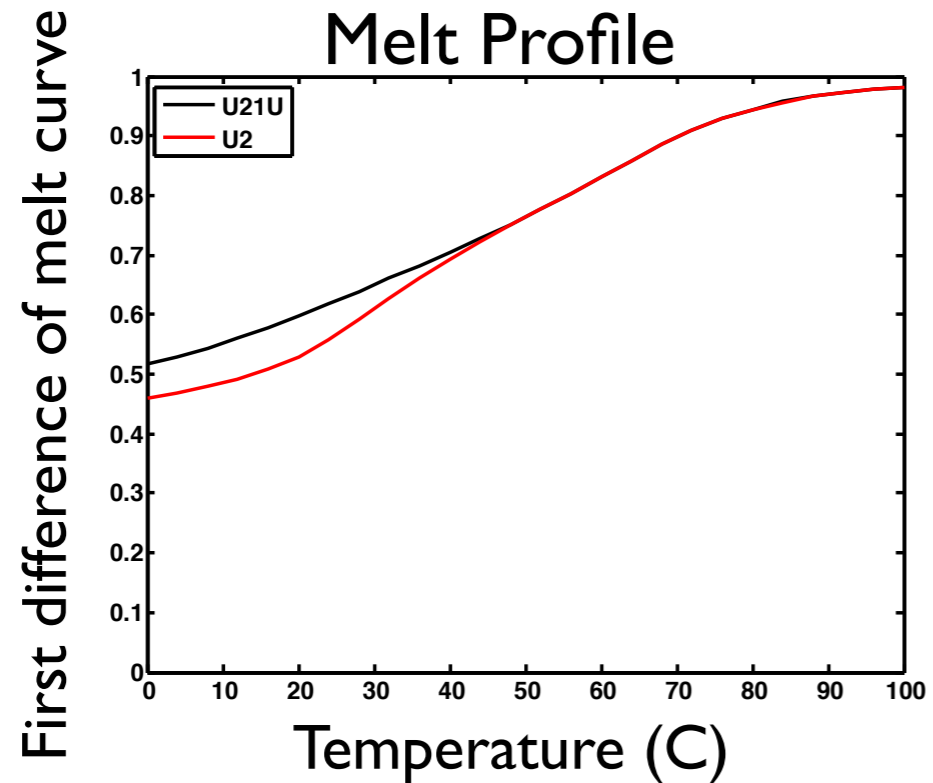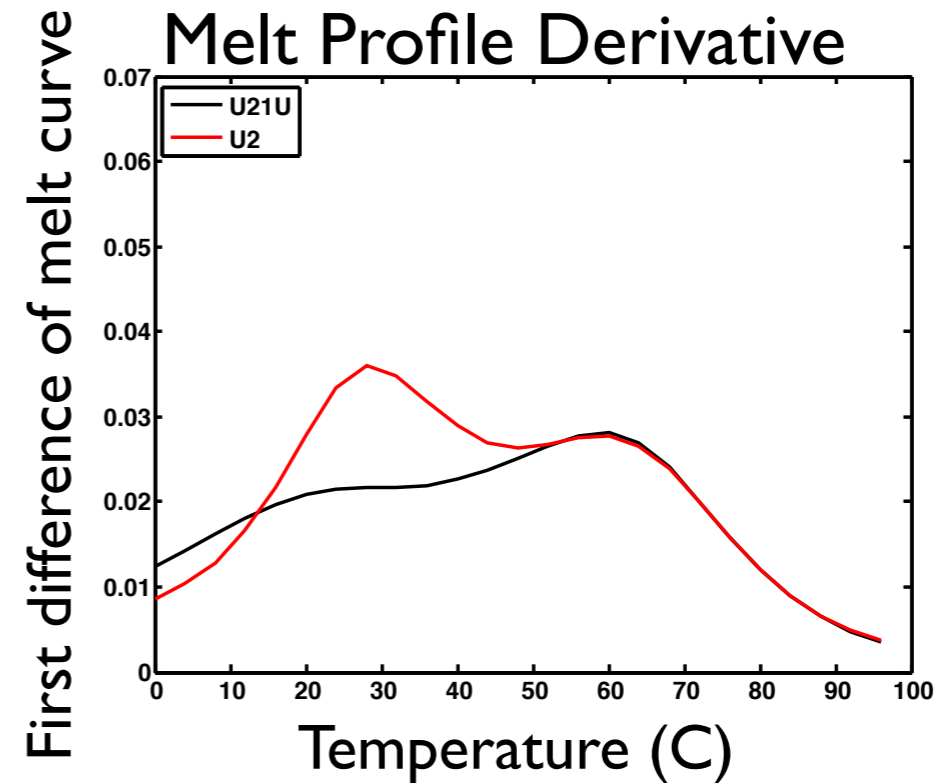

# U220

Different - Linear

MFE structure at 0.0 C

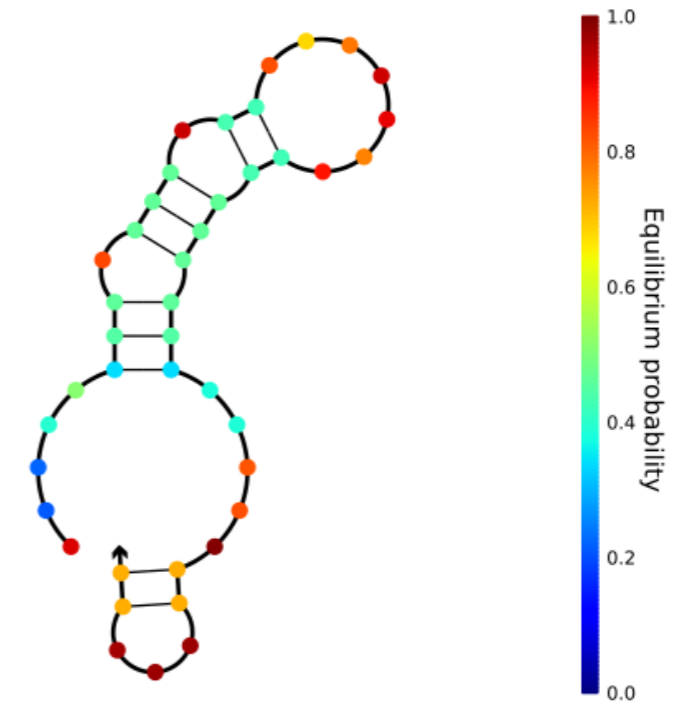

Free energy of secondary structure: -13.06 kcal/mol

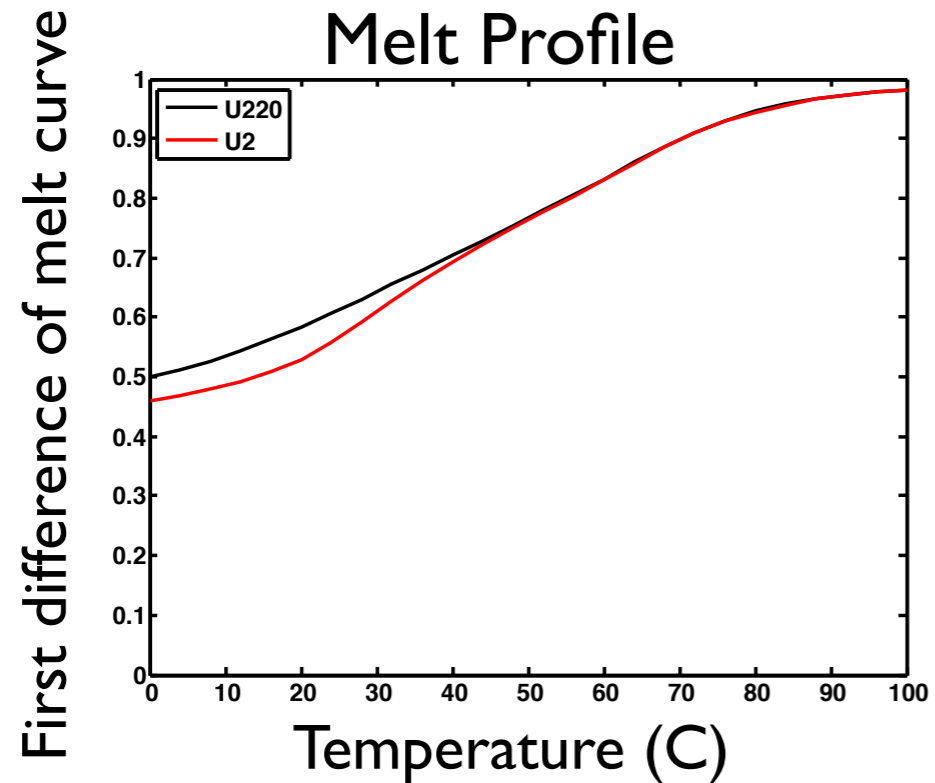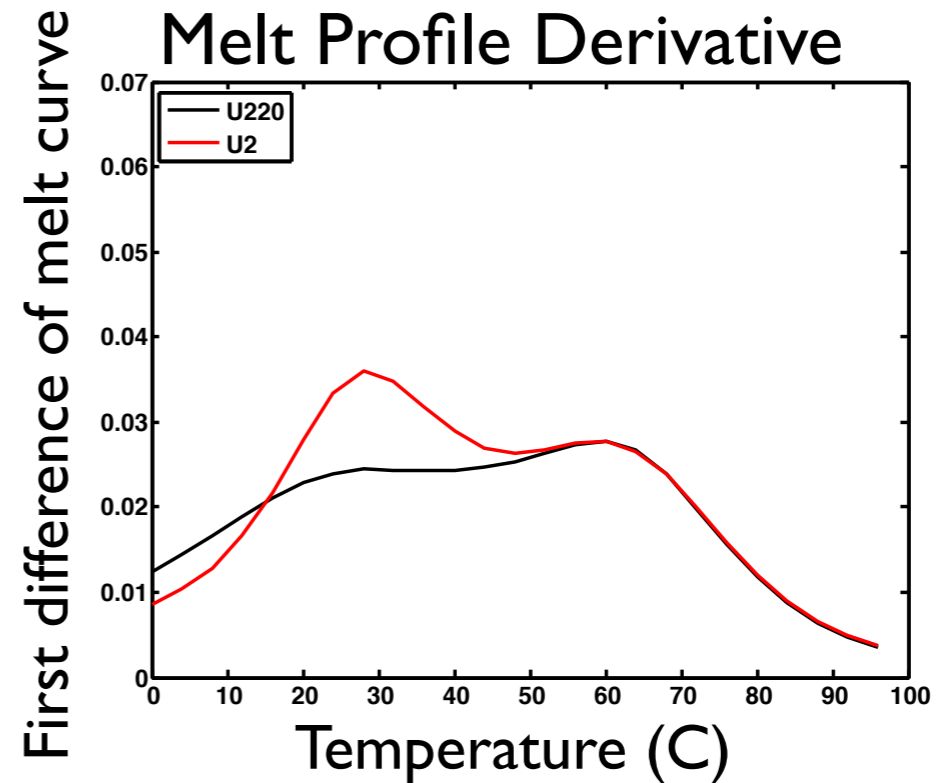

# U22A

Different - Linear

MFE structure at 0.0 C

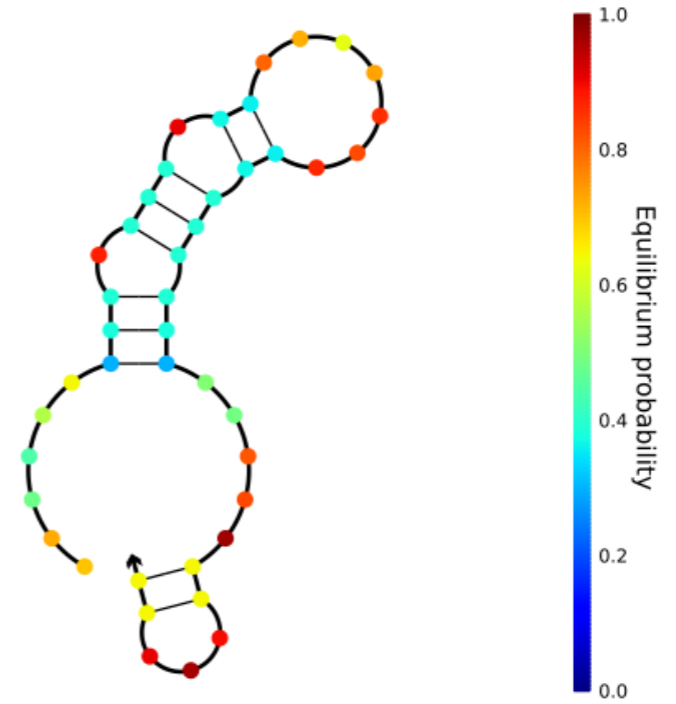

Free energy of secondary structure: -13.06 kcal/mol

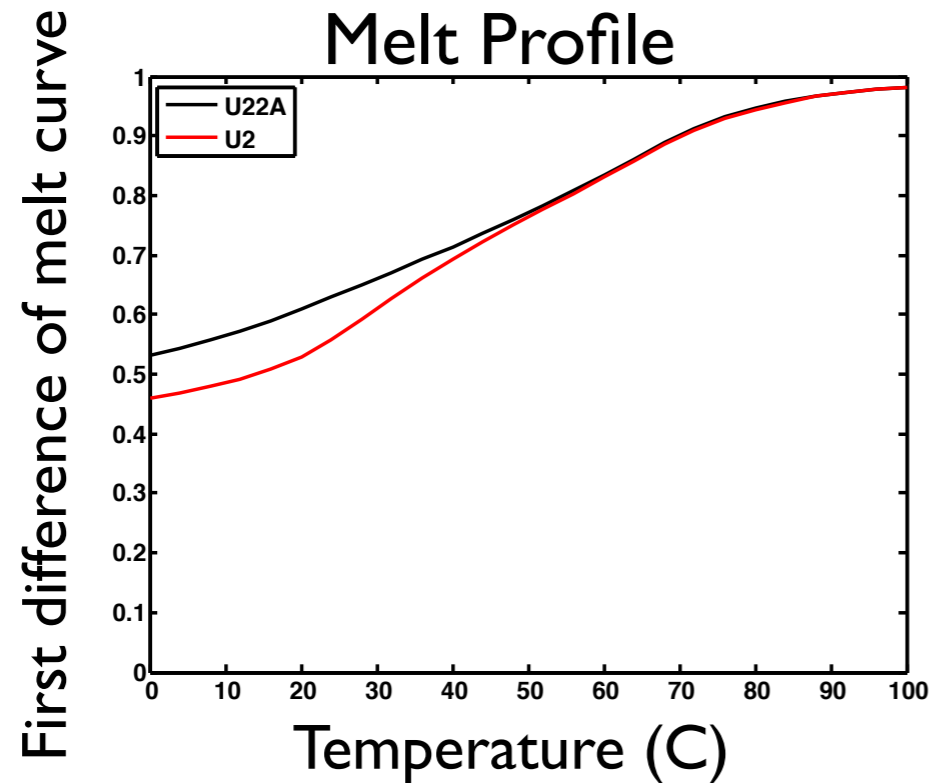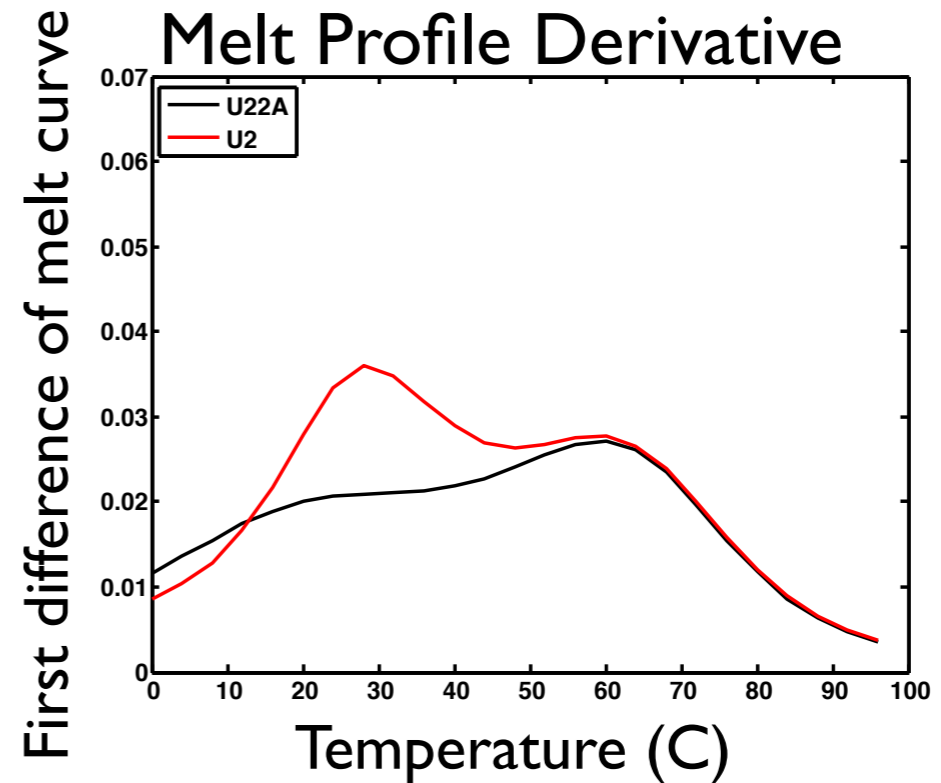

# U22C

Different - Linear

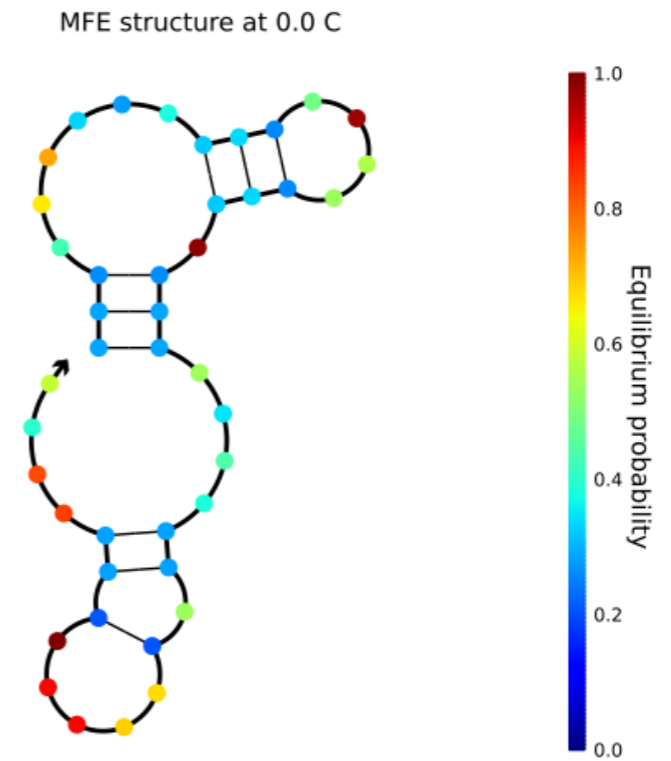

Free energy of secondary structure: -13.33 kcal/mol

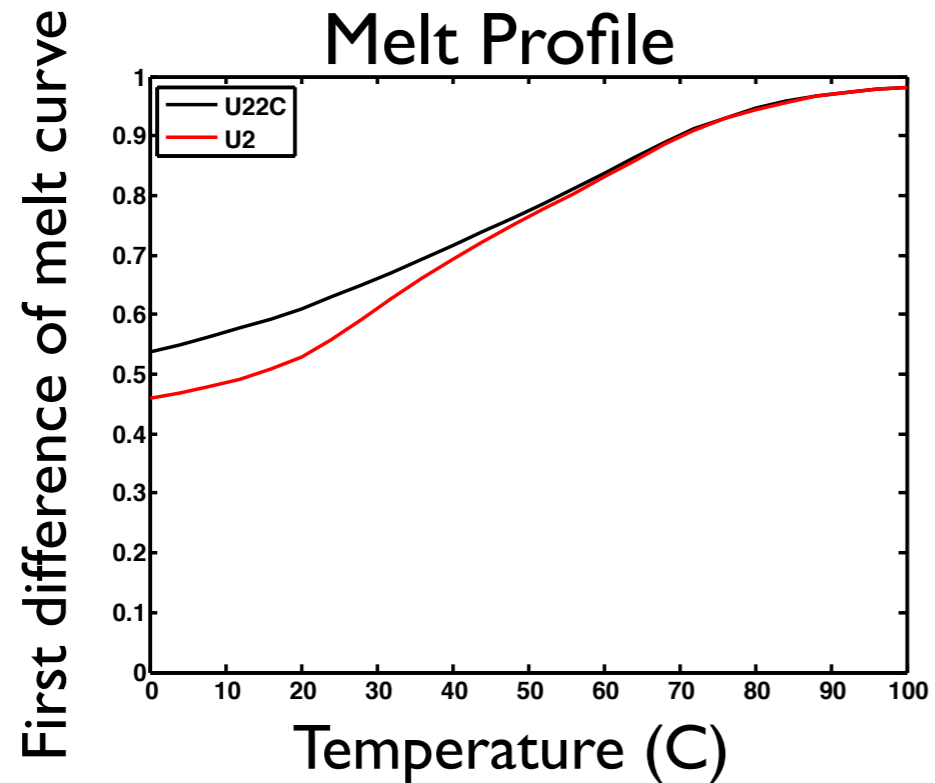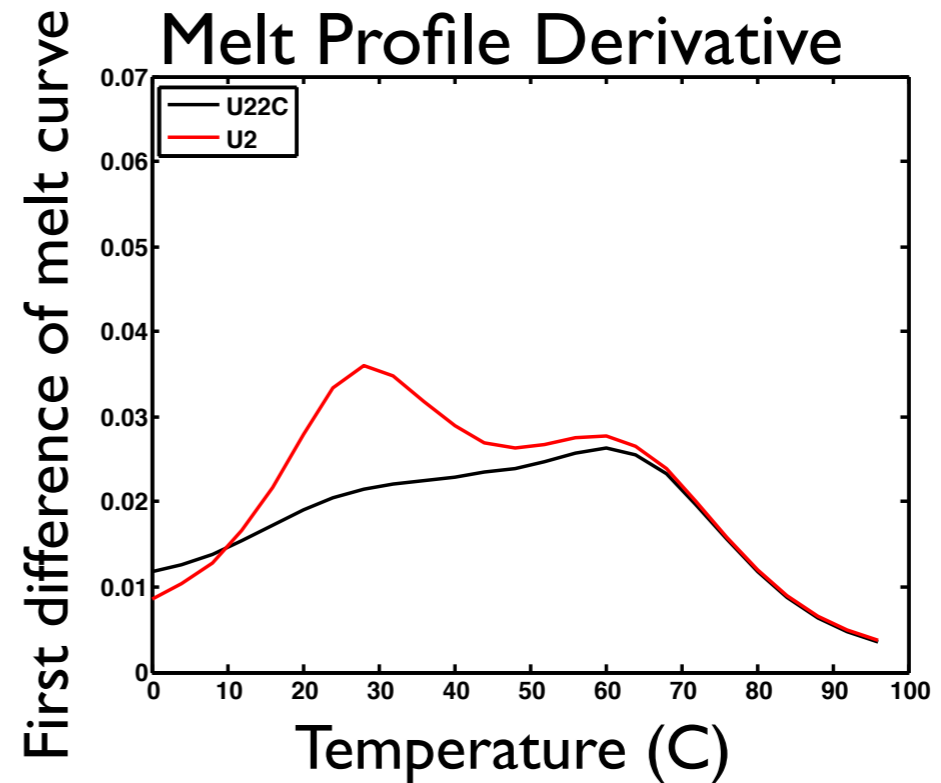

# U22U

Different - Threshold, shifted

MFE structure at 0.0 C

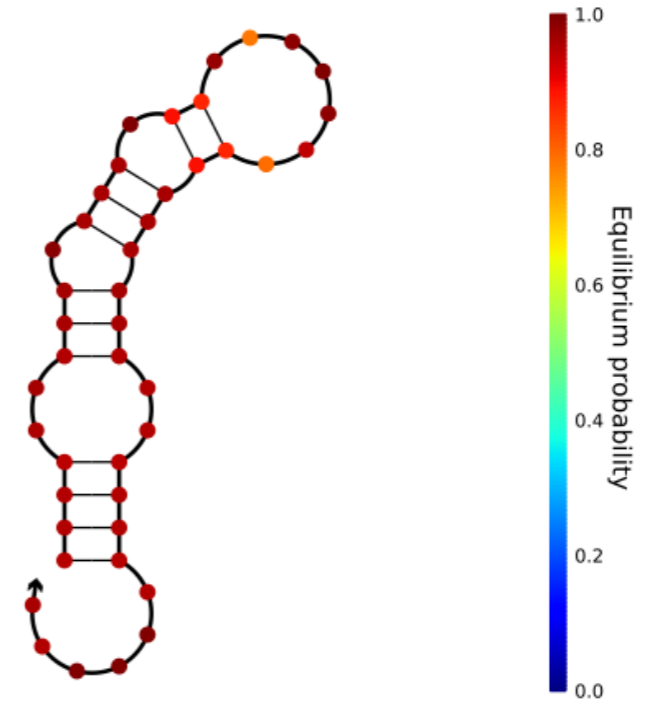

Free energy of secondary structure: -17.03 kcal/mol

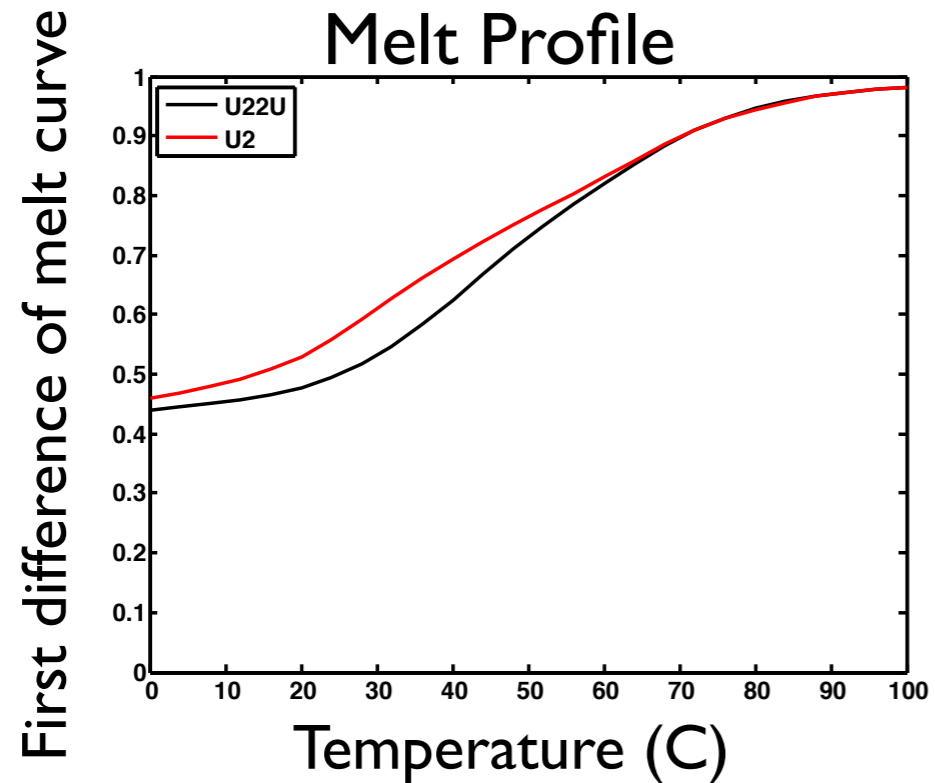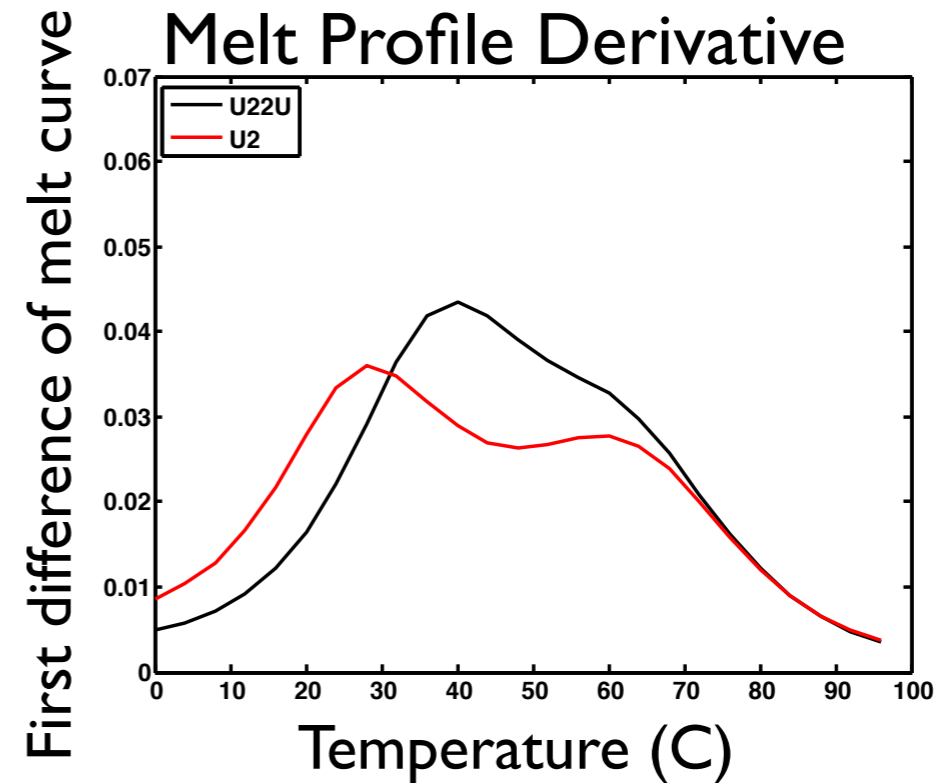



# U230

Different - Threshold, shifted

MFE structure at 0.0 C

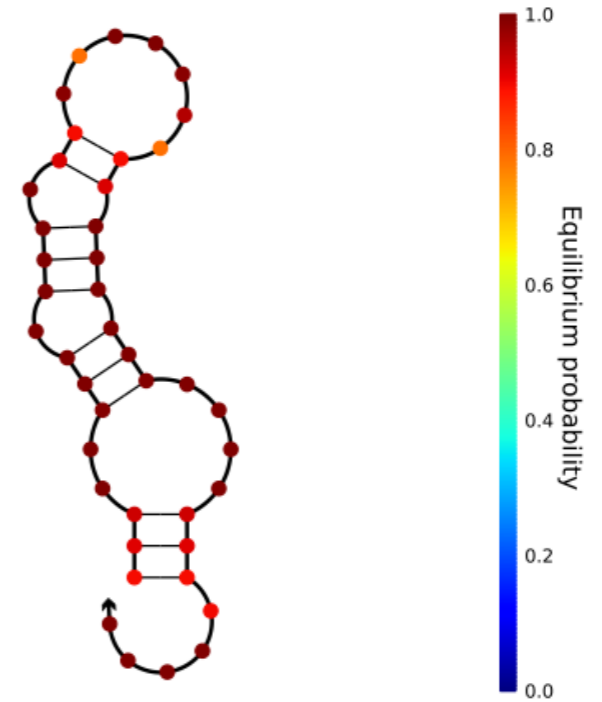

Free energy of secondary structure: -16.40 kcal/mol

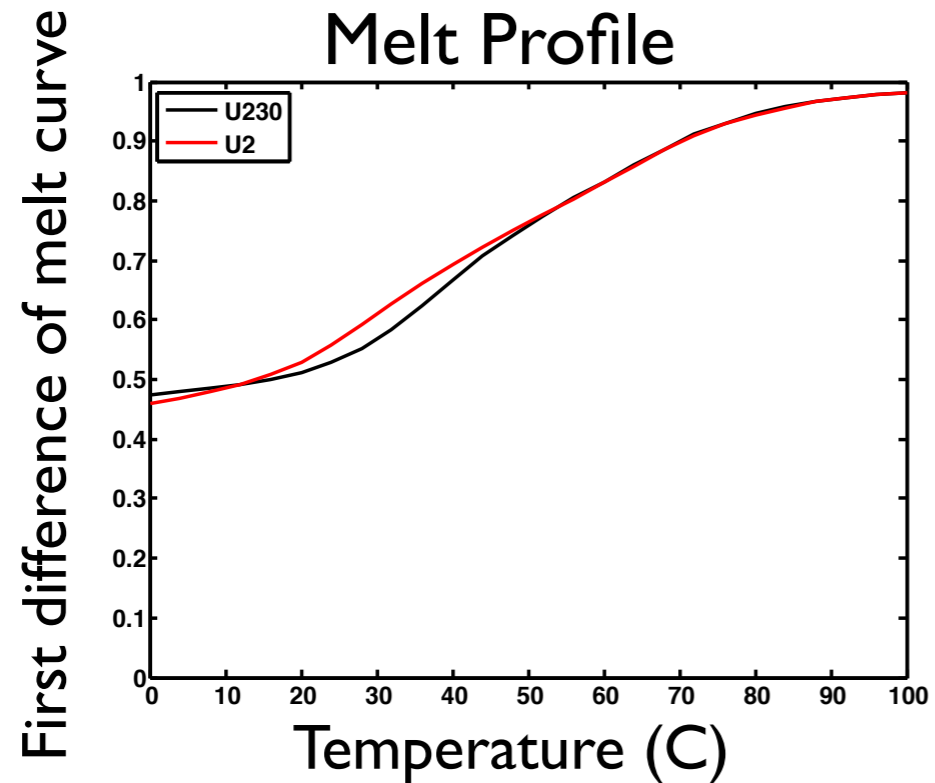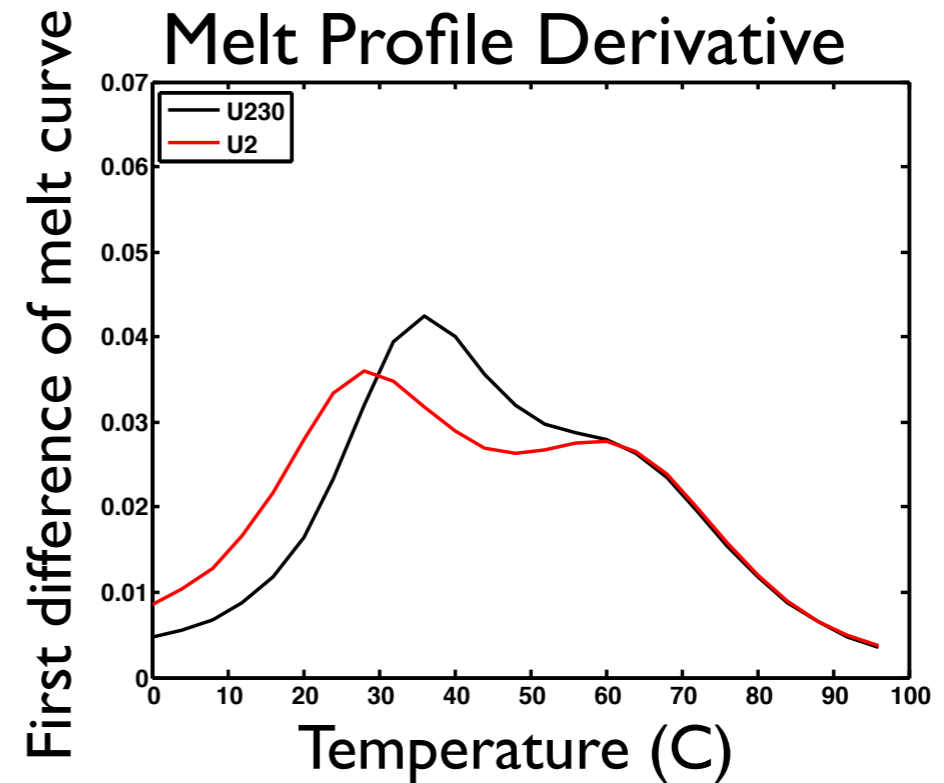

# U23C

Different - Linear  
Note temperature range

MFE structure at 0.0 C

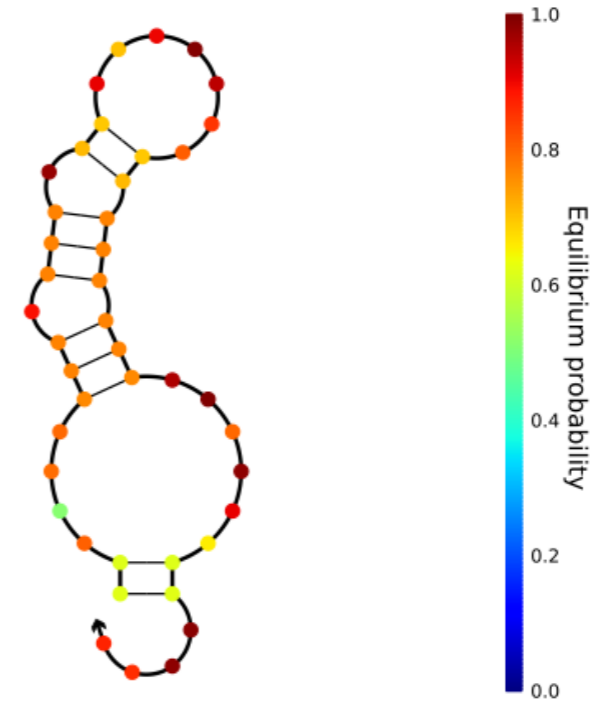

Free energy of secondary structure: -14.77 kcal/mol

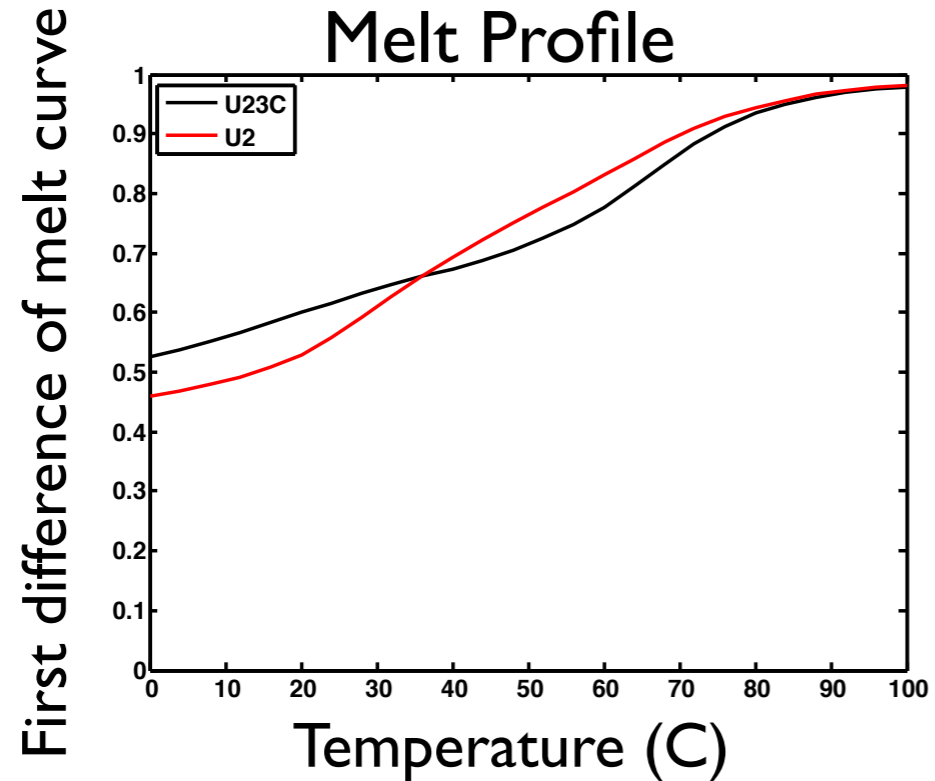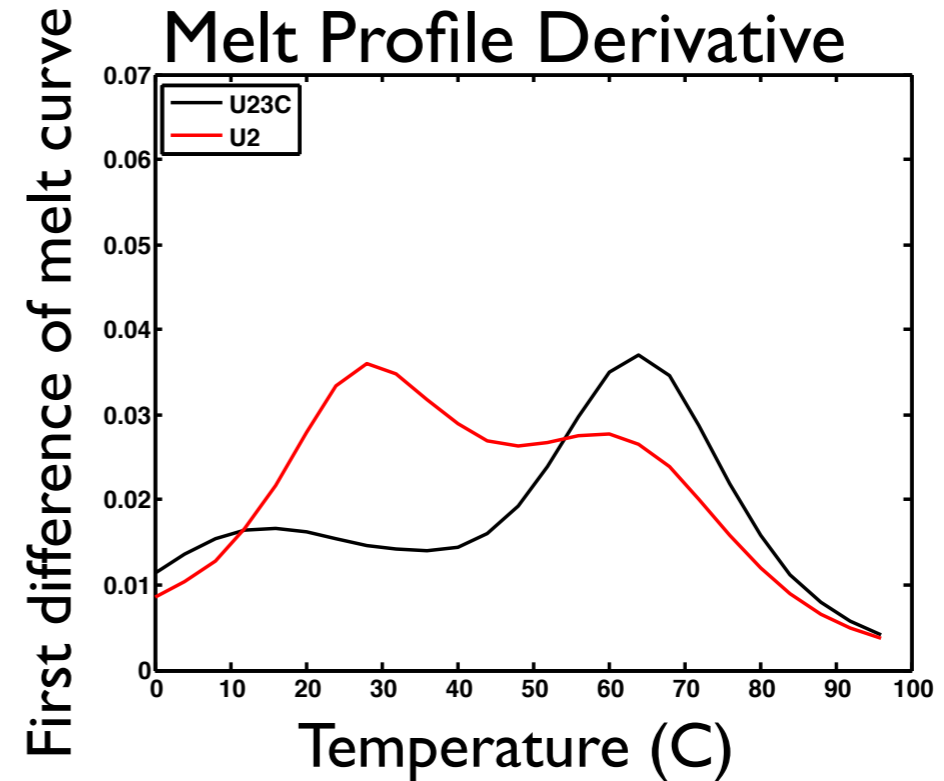

# U23G

Different - Threshold  
Note temperature range

MFE structure at 0.0 C

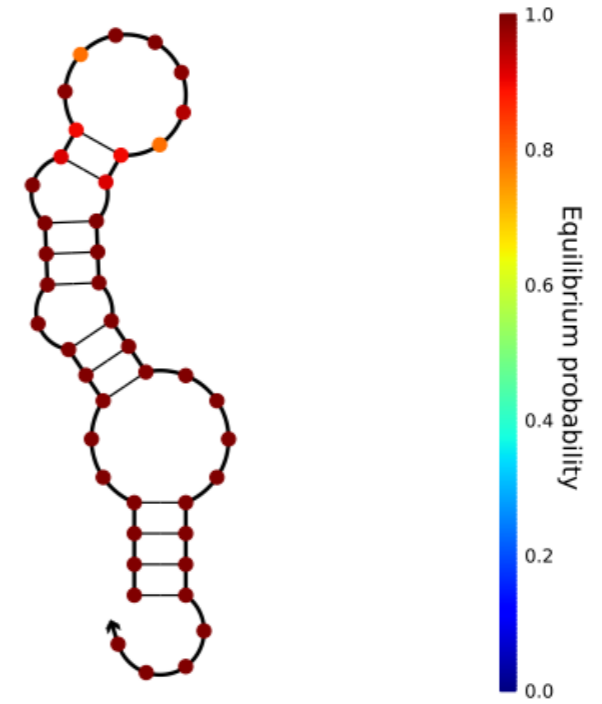

Free energy of secondary structure: -21.78 kcal/mol

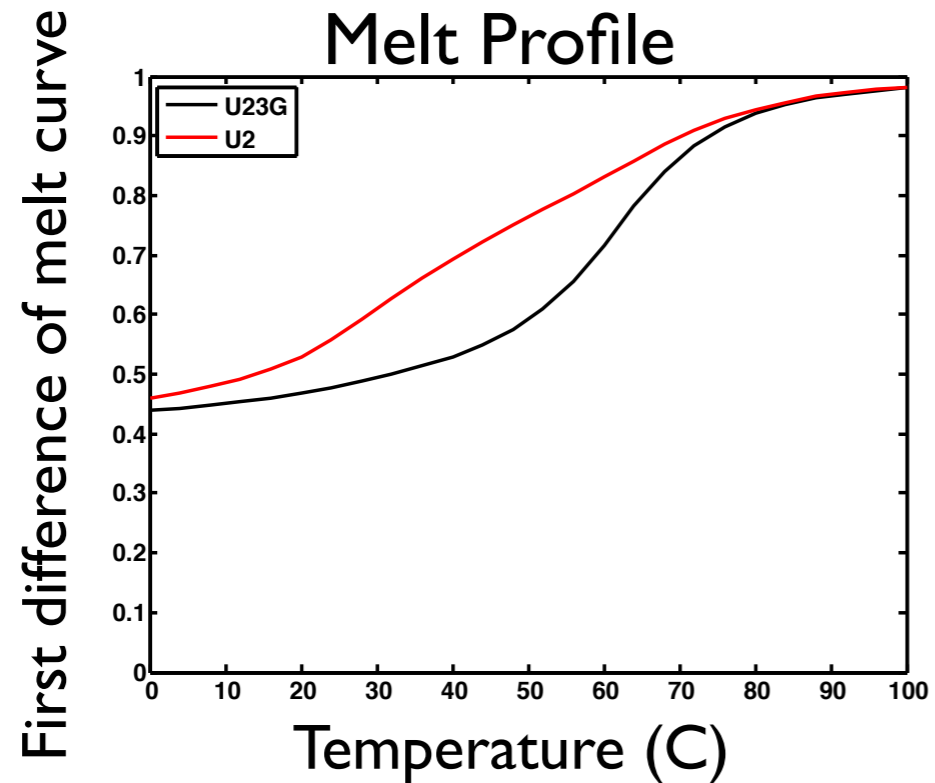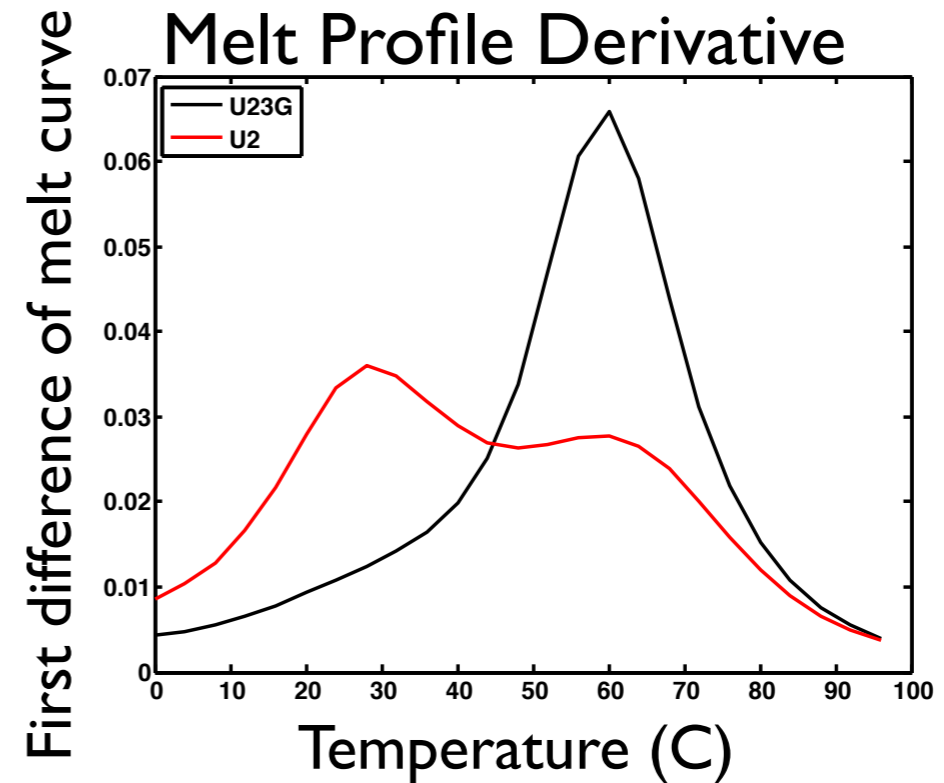

# U240

Same

MFE structure at 0.0 C

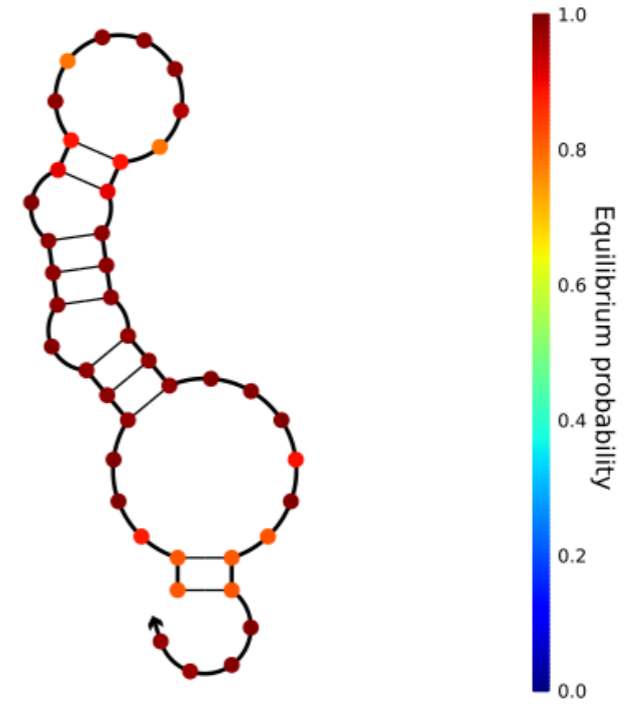

Free energy of secondary structure: -15.37 kcal/mol

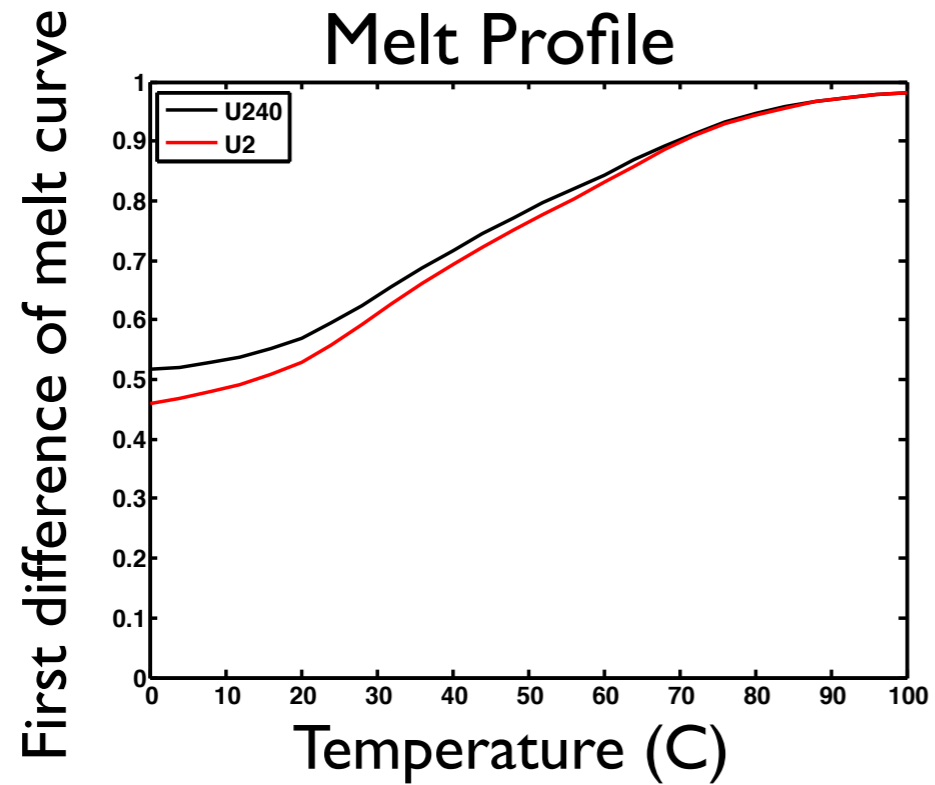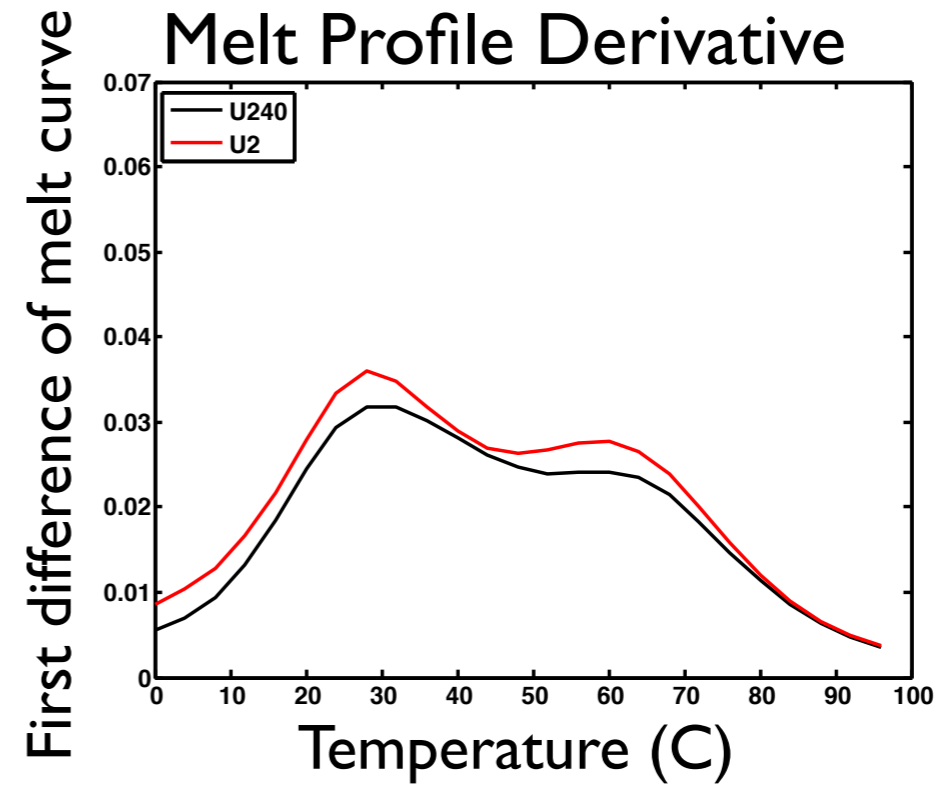

# U24A

Same

MFE structure at 0.0 C

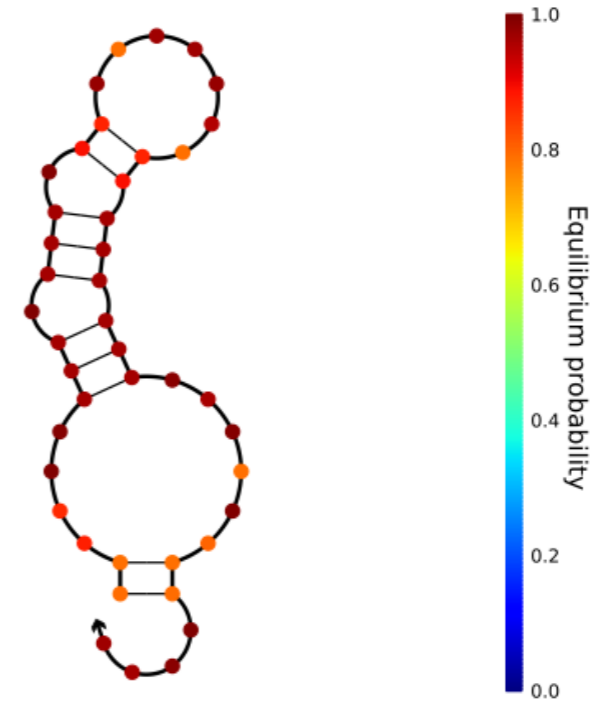

Free energy of secondary structure: -15.45 kcal/mol

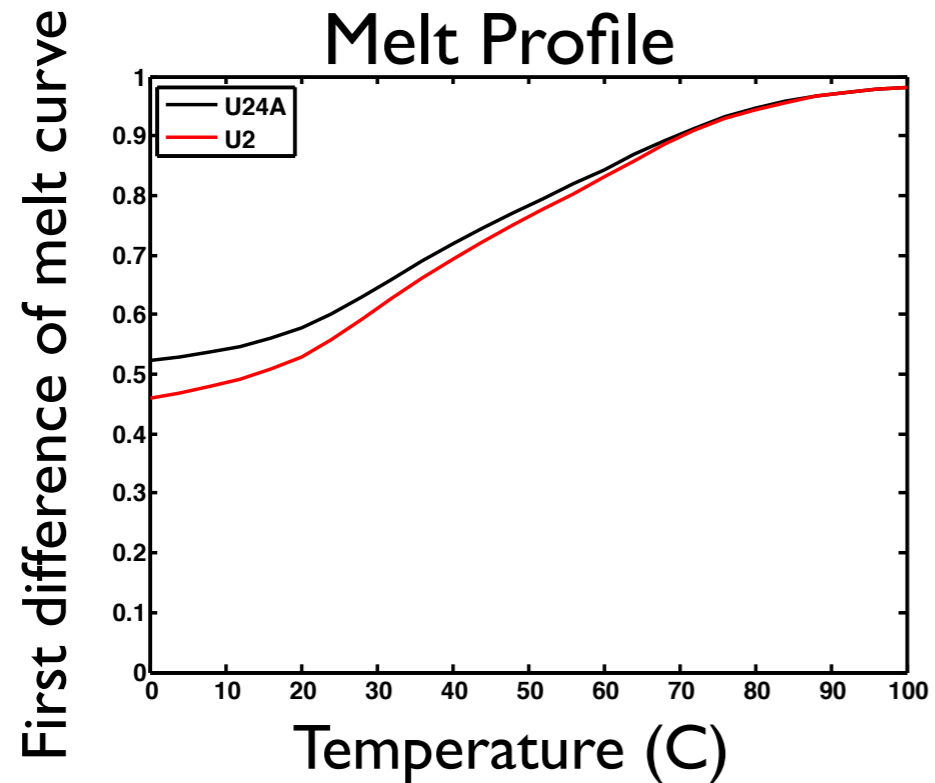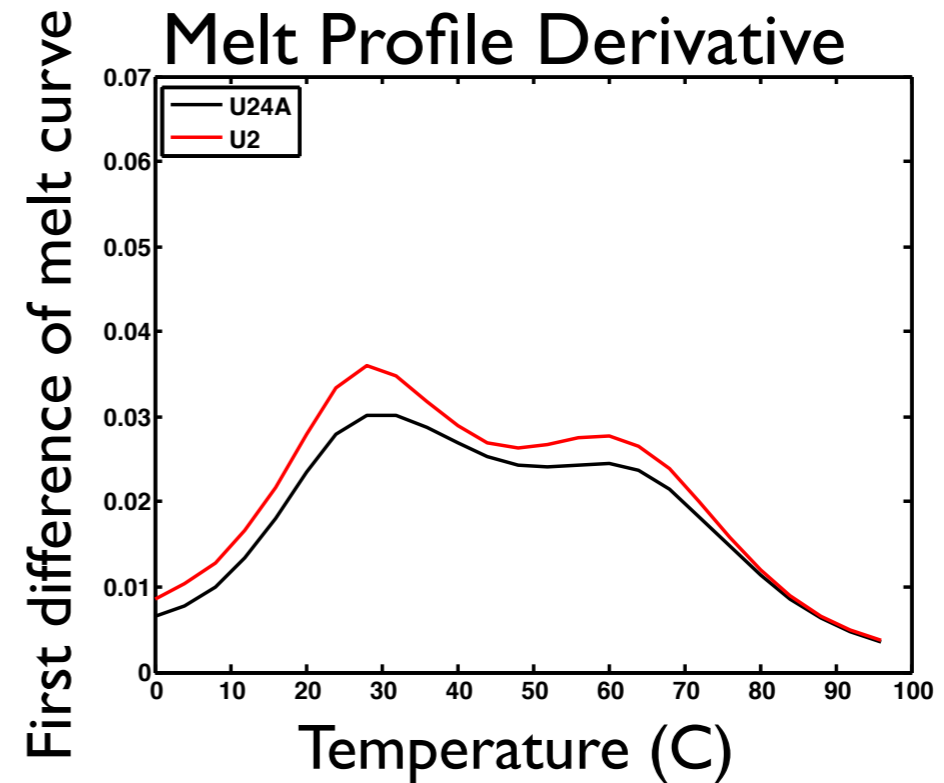

# U24C

Same

MFE structure at 0.0 C

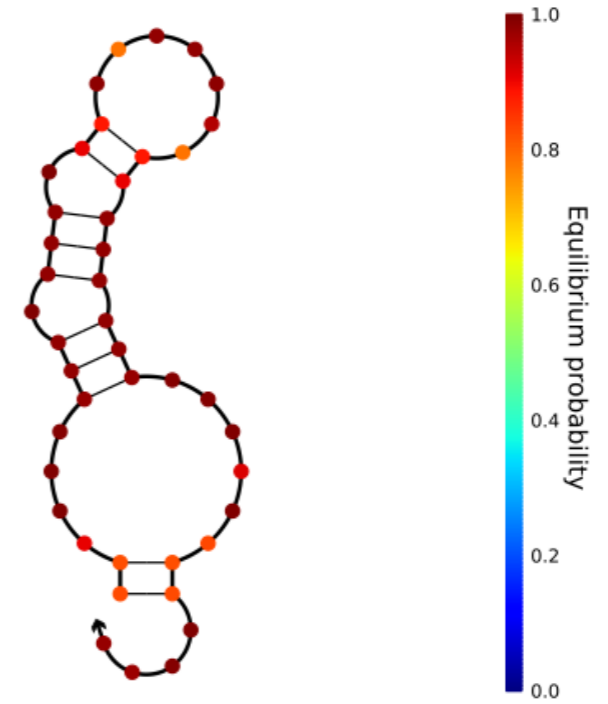

Free energy of secondary structure: -15.45 kcal/mol

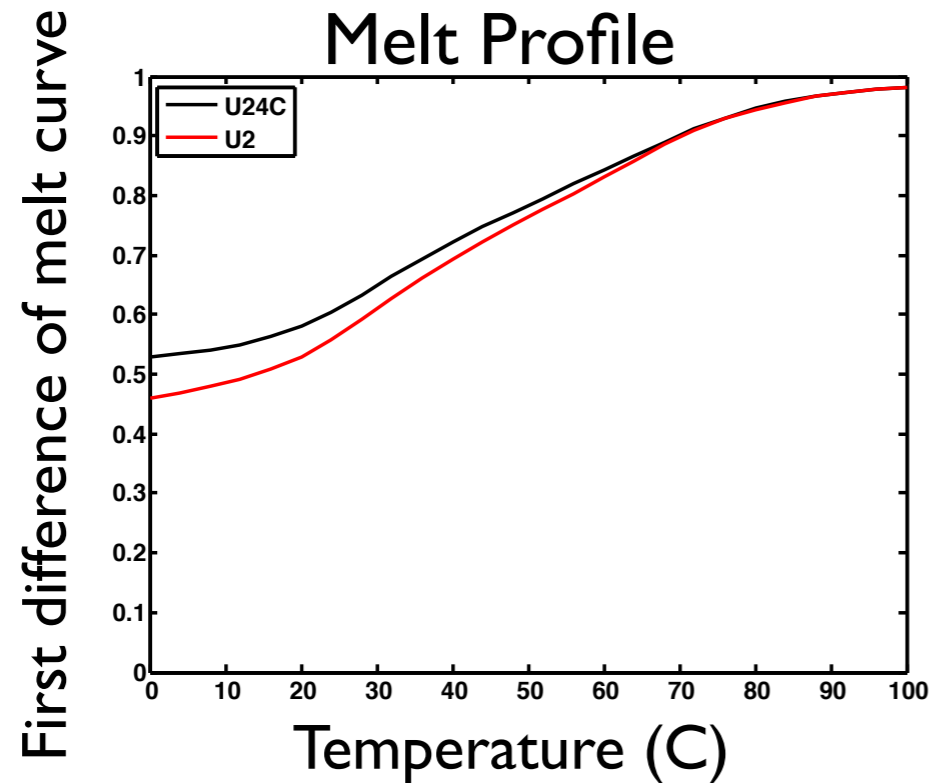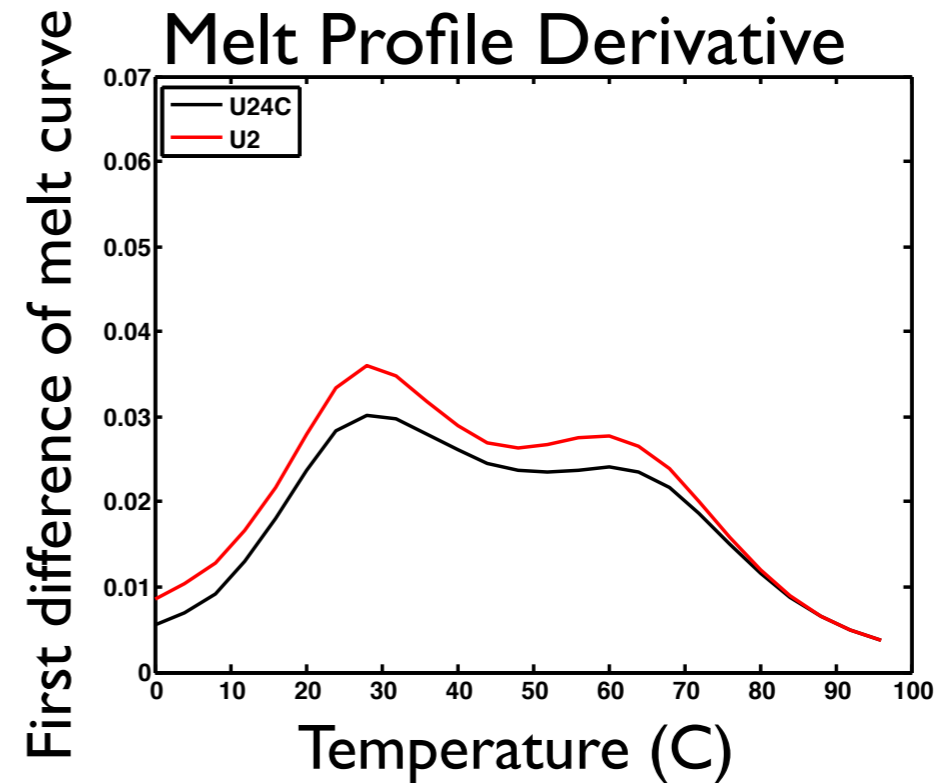

# U24G

Same

MFE structure at 0.0 C

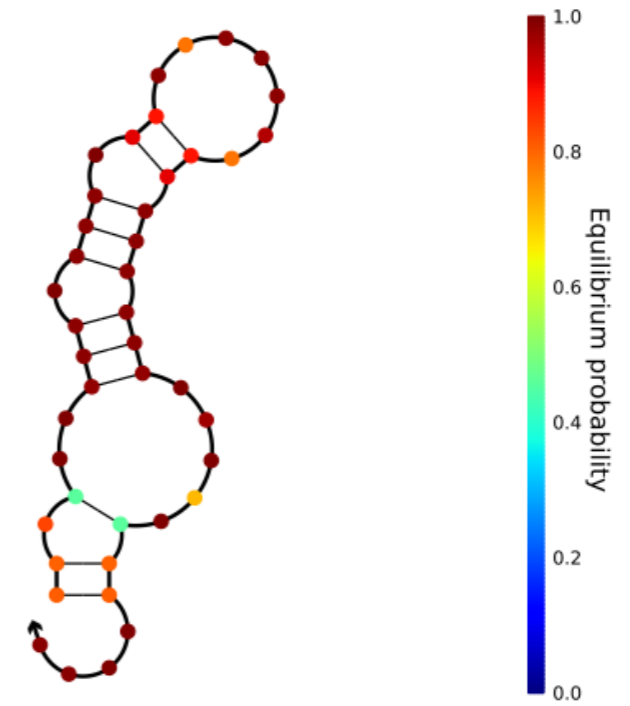

Free energy of secondary structure: -15.93 kcal/mol

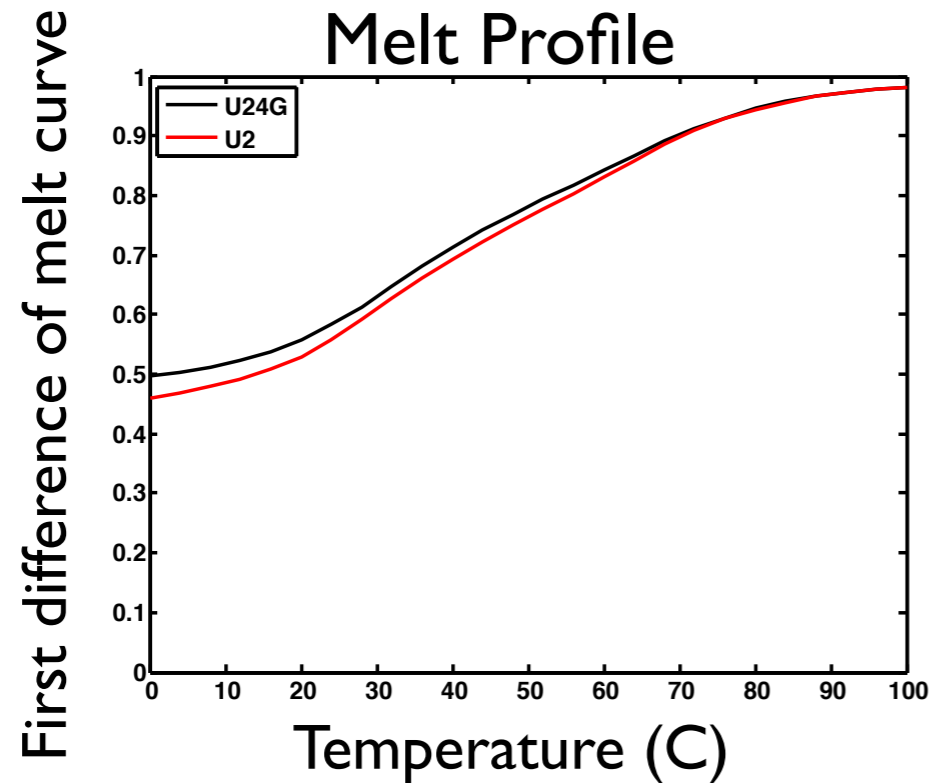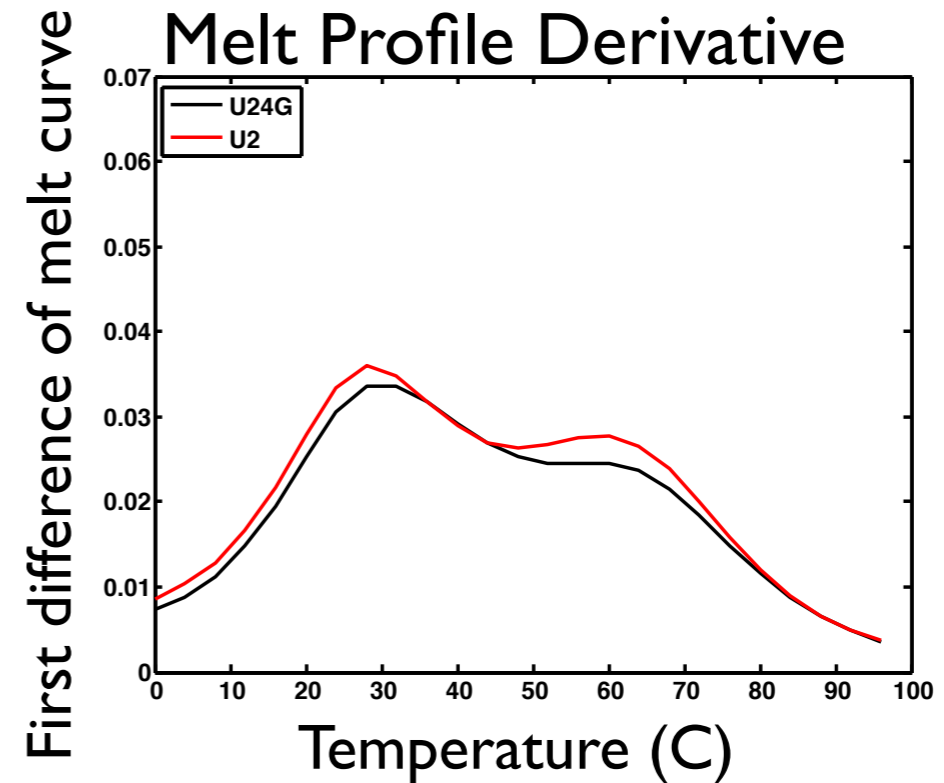

# U270

Same

MFE structure at 0.0 C

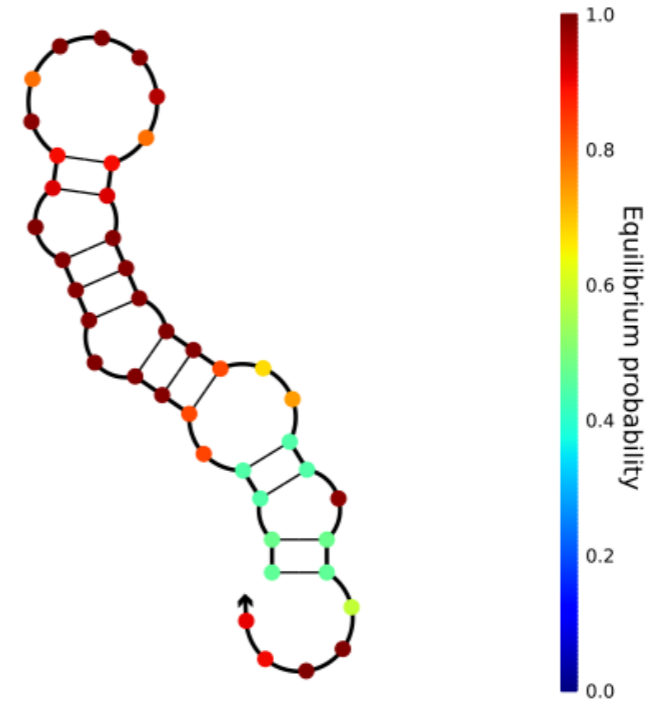

Free energy of secondary structure: -15.77 kcal/mol

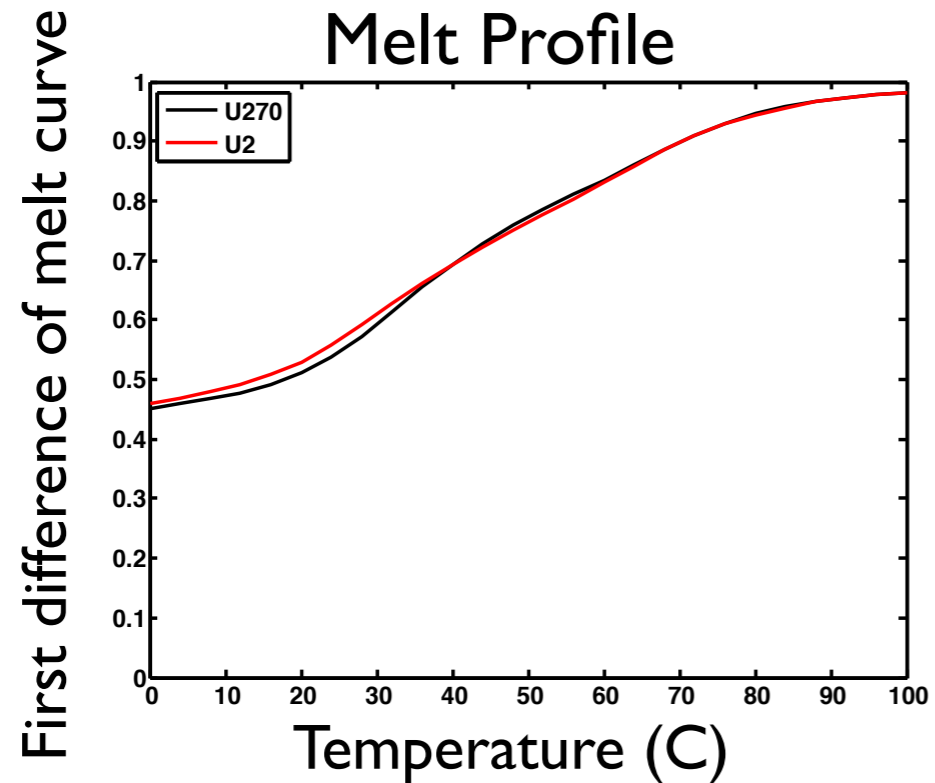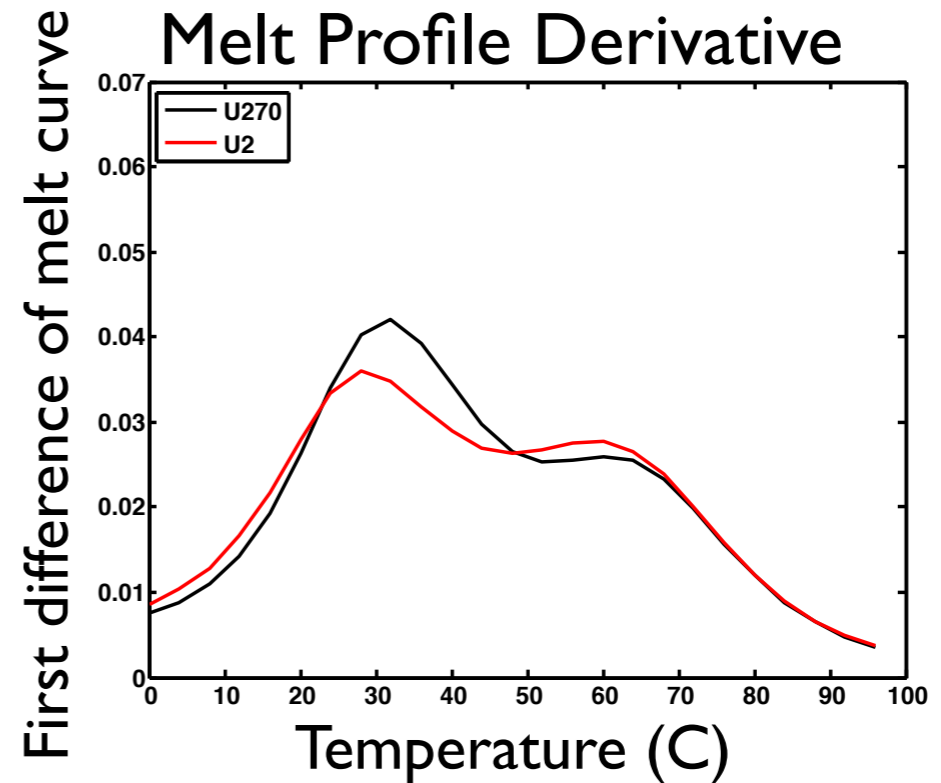



# U27A

Different

MFE structure at 0.0 C

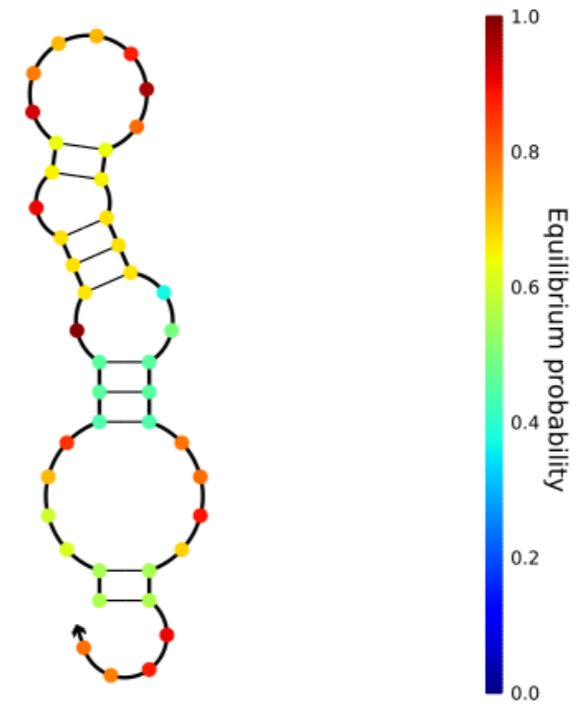

Free energy of secondary structure: -13.76 kcal/mol

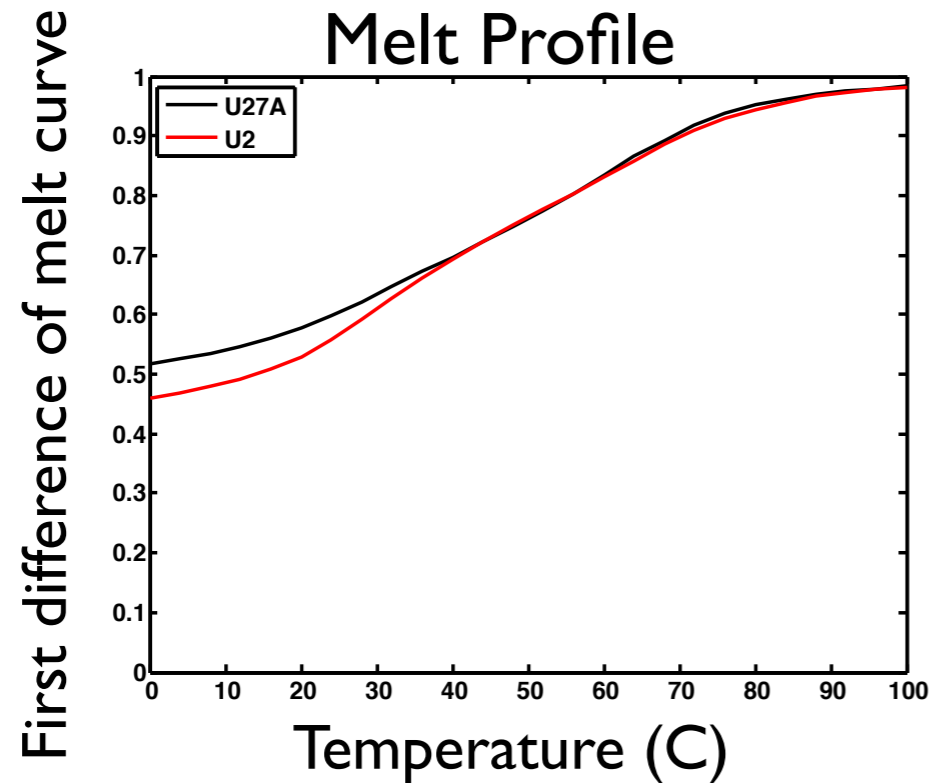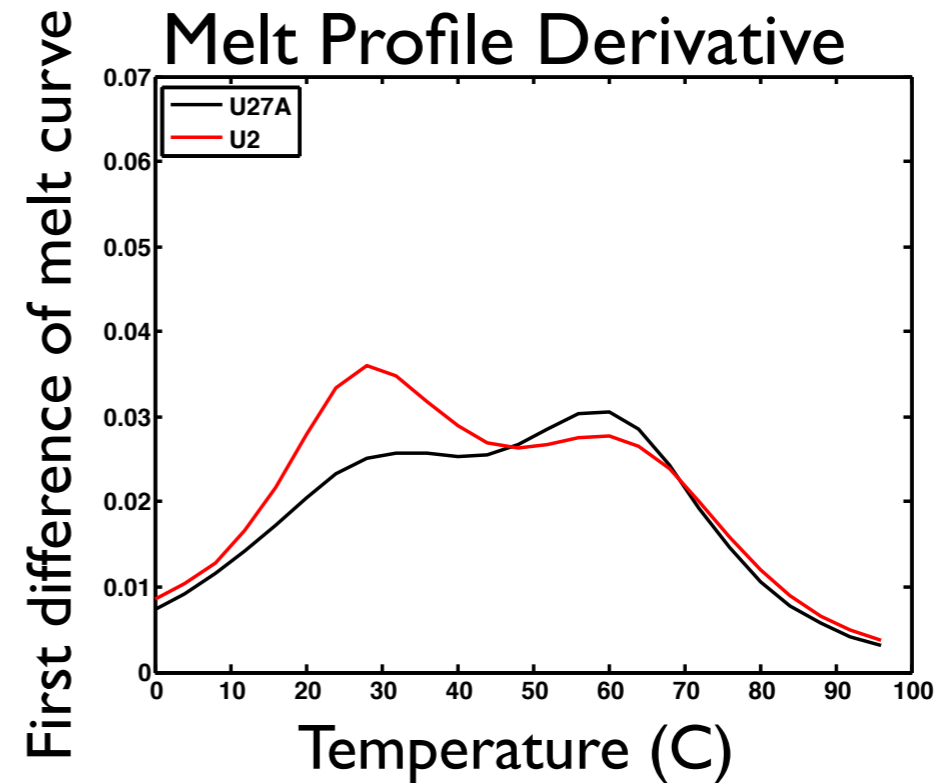

# U27G

Different - Linear

MFE structure at 0.0 C

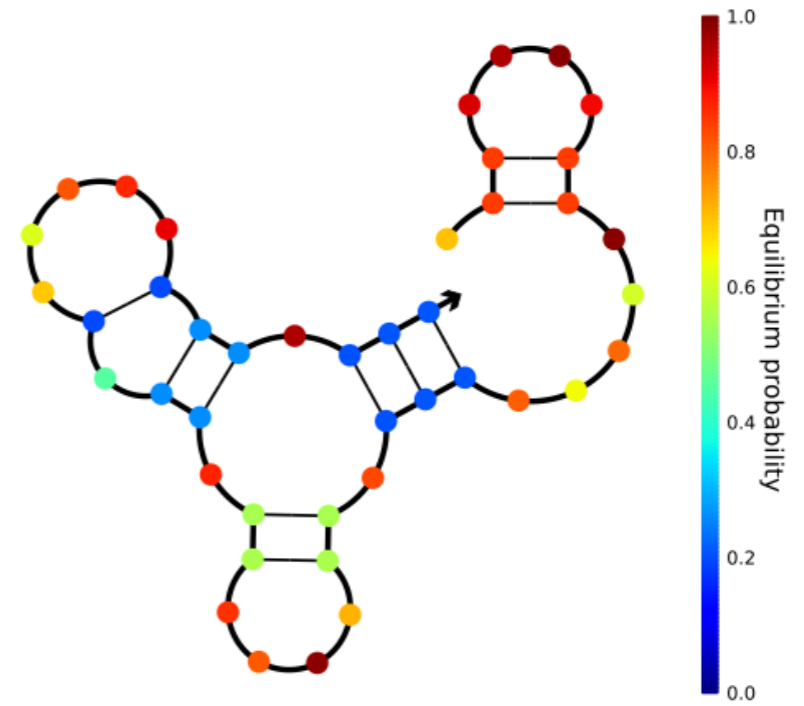

Free energy of secondary structure: -14.49 kcal/mol

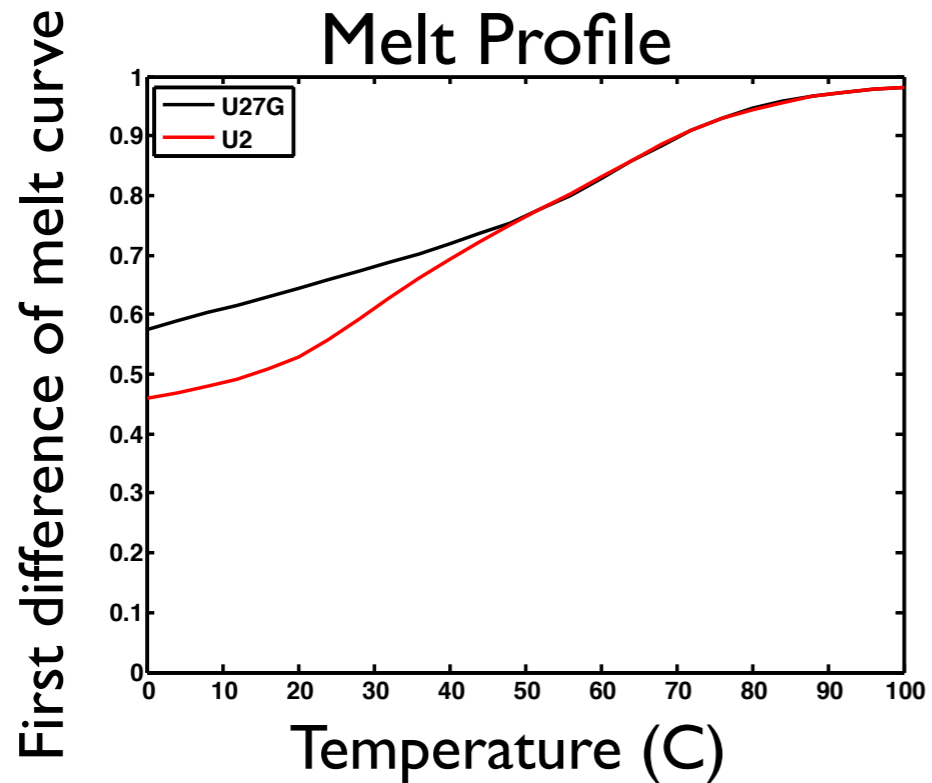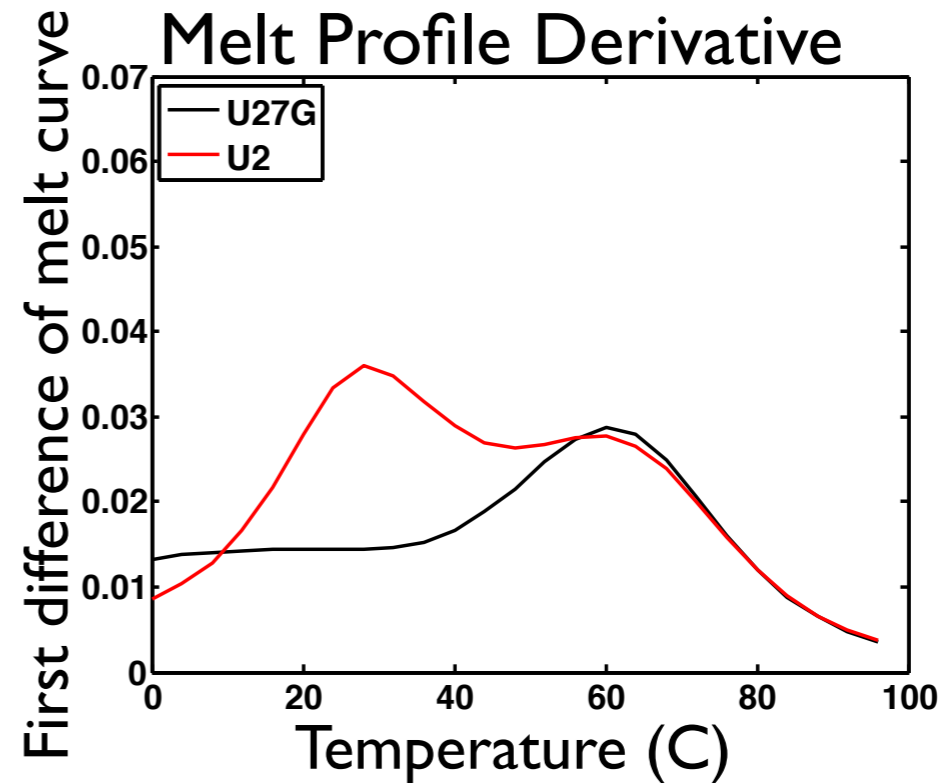

# U27U

Different - Linear  
Note Temperature Range

MFE structure at 0.0 C

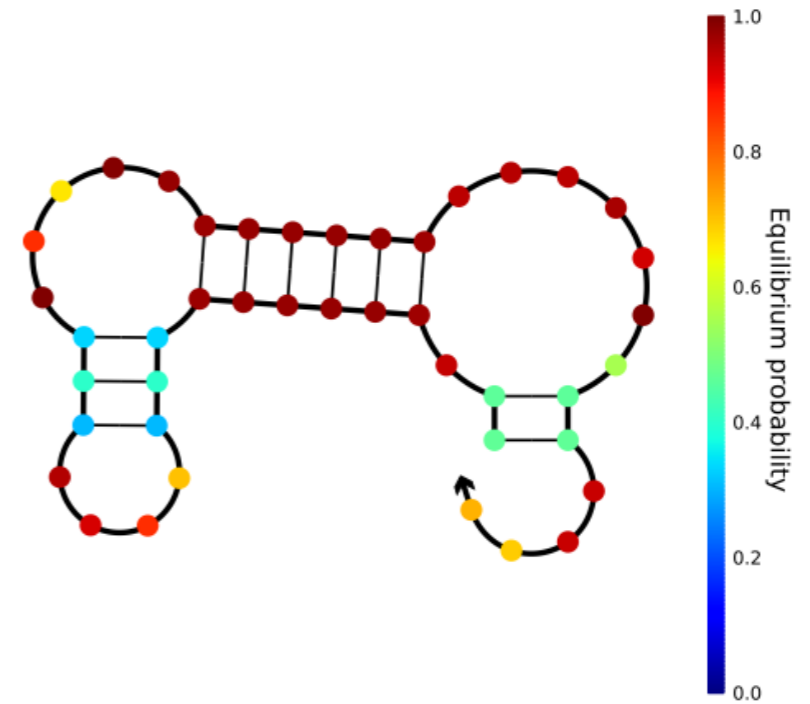

Free energy of secondary structure: -15.80 kcal/mol

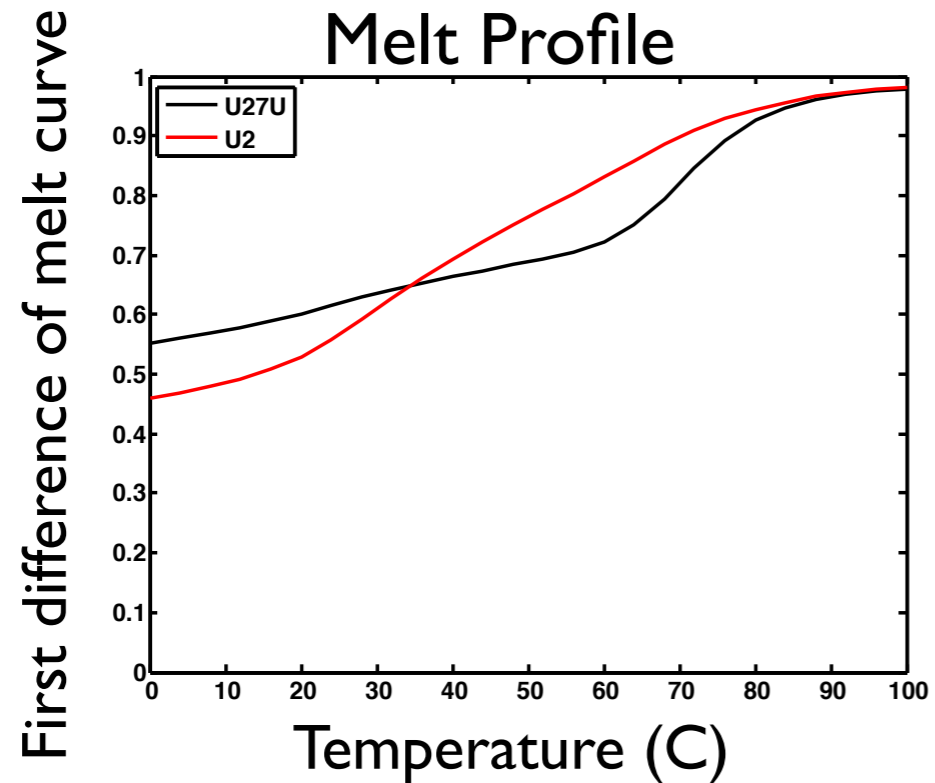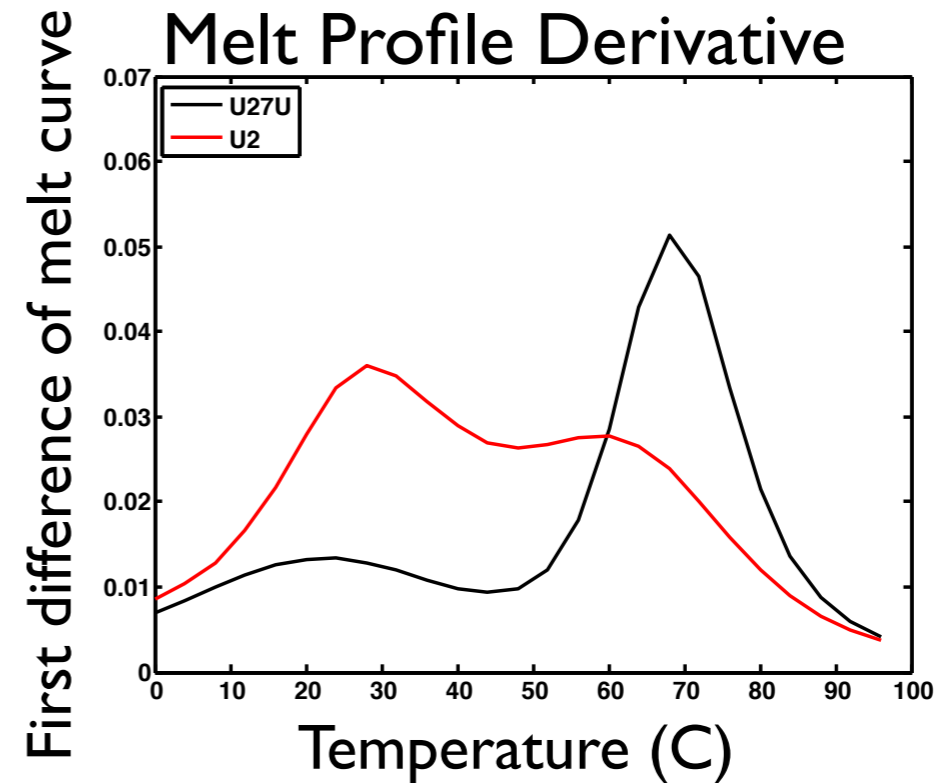

# U280

Different - Linear

MFE structure at 0.0 C

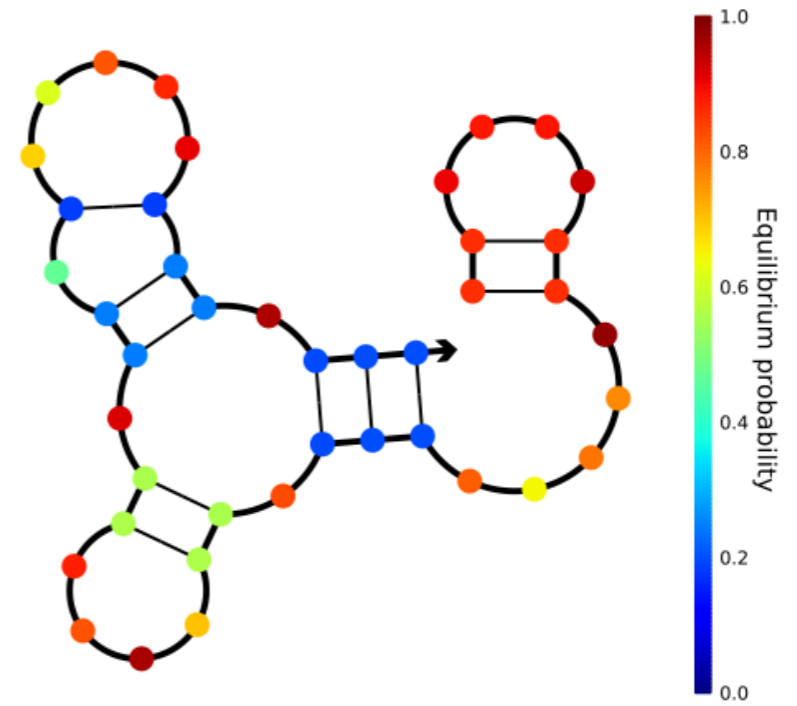

Free energy of secondary structure: -13.20 kcal/mol

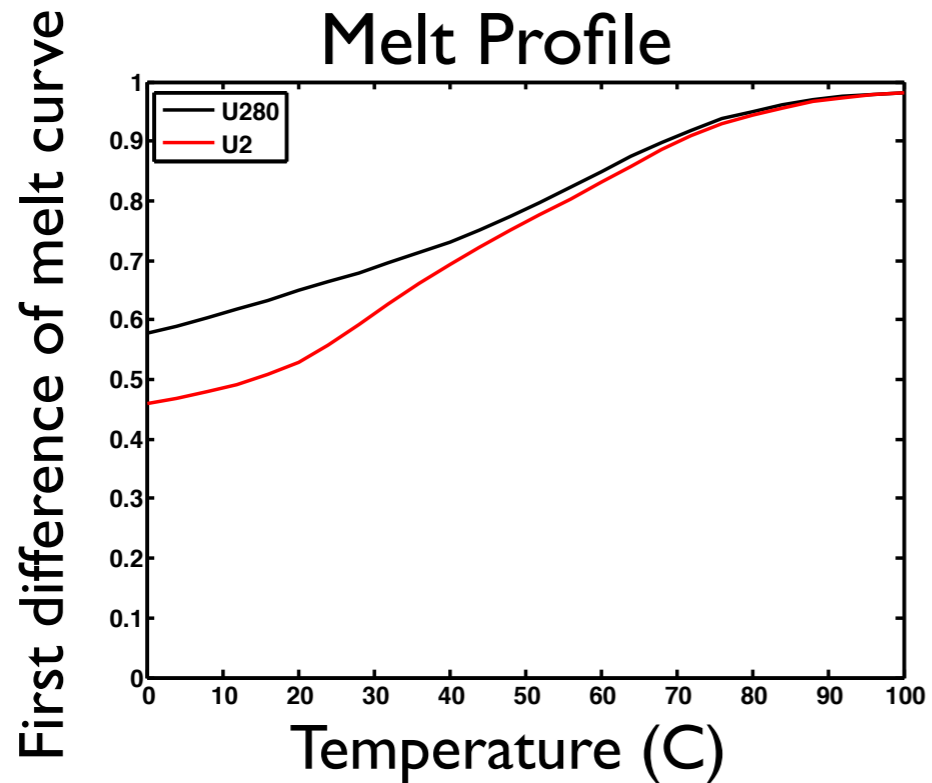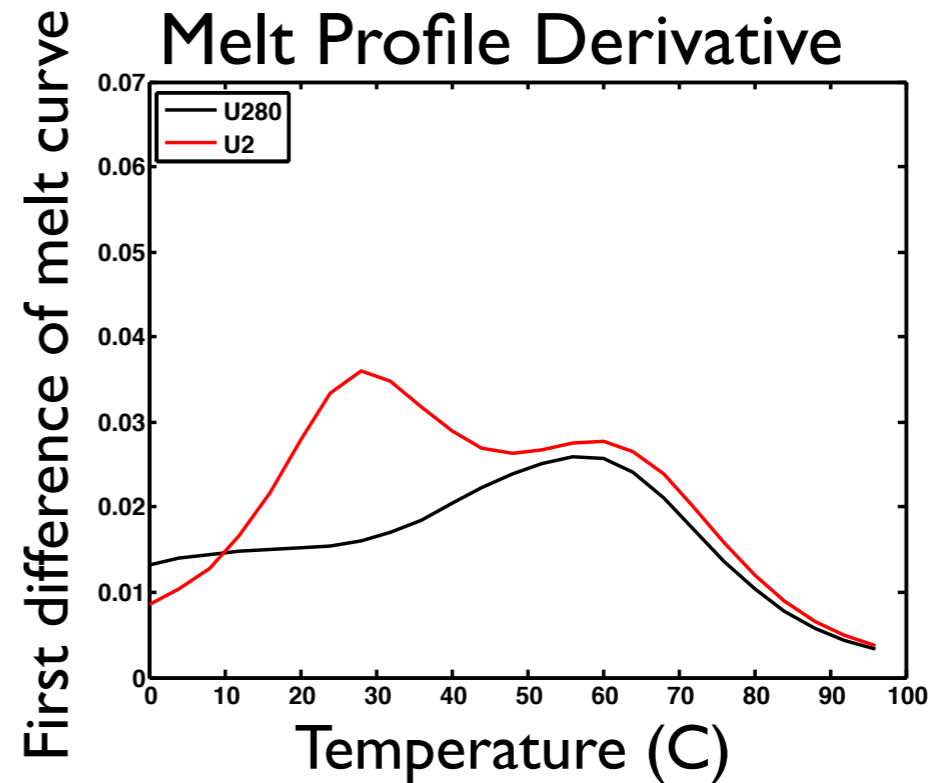

# U28A

Different - Linear

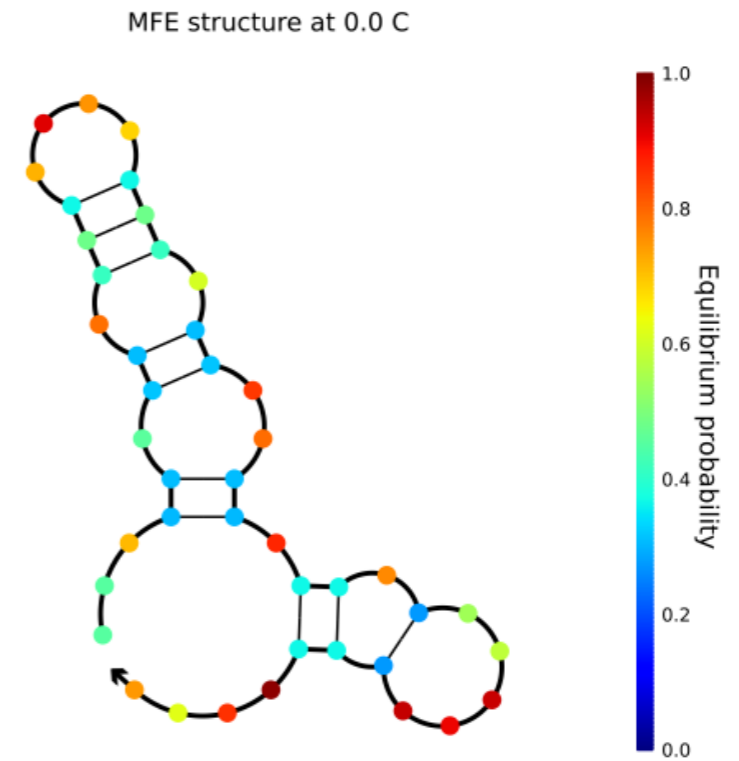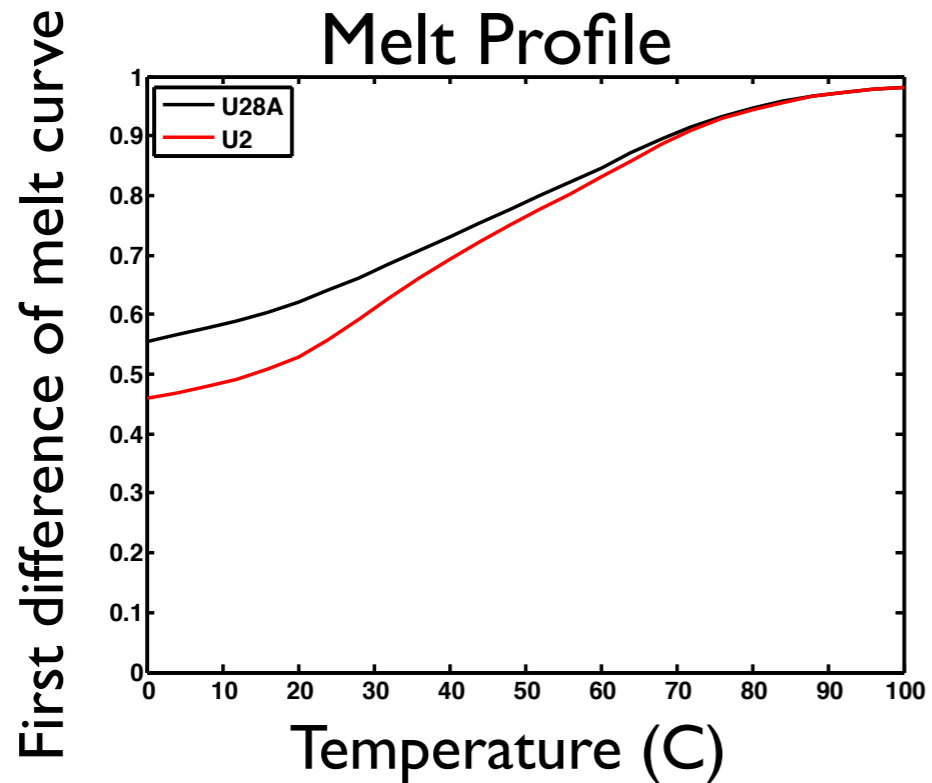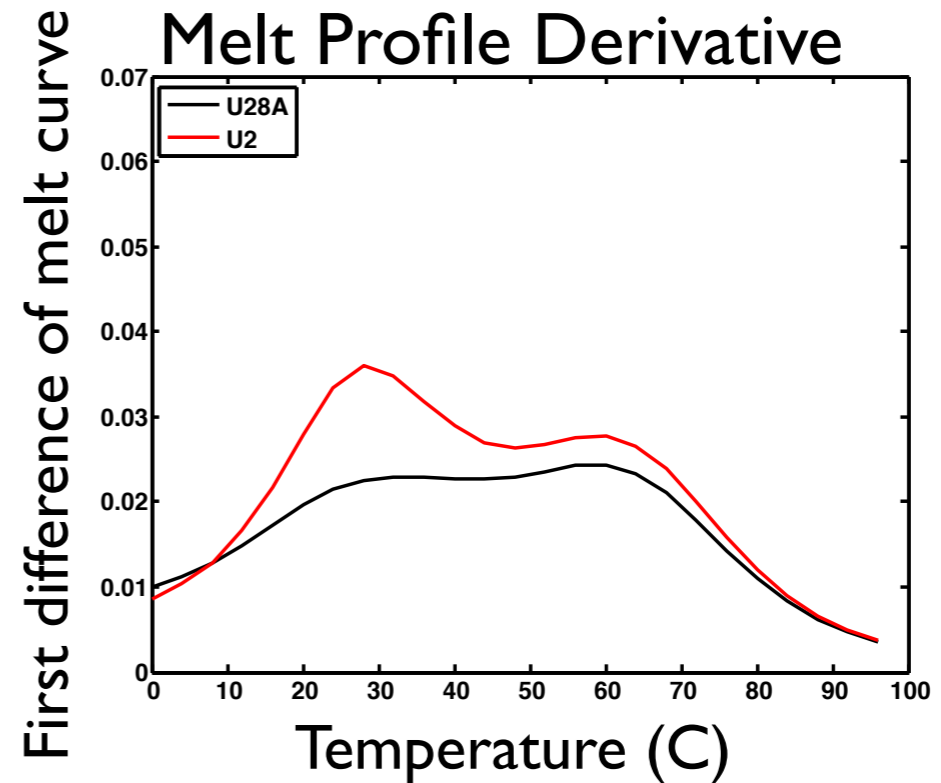

# U28C

Different - Linear

MFE structure at 0.0 C

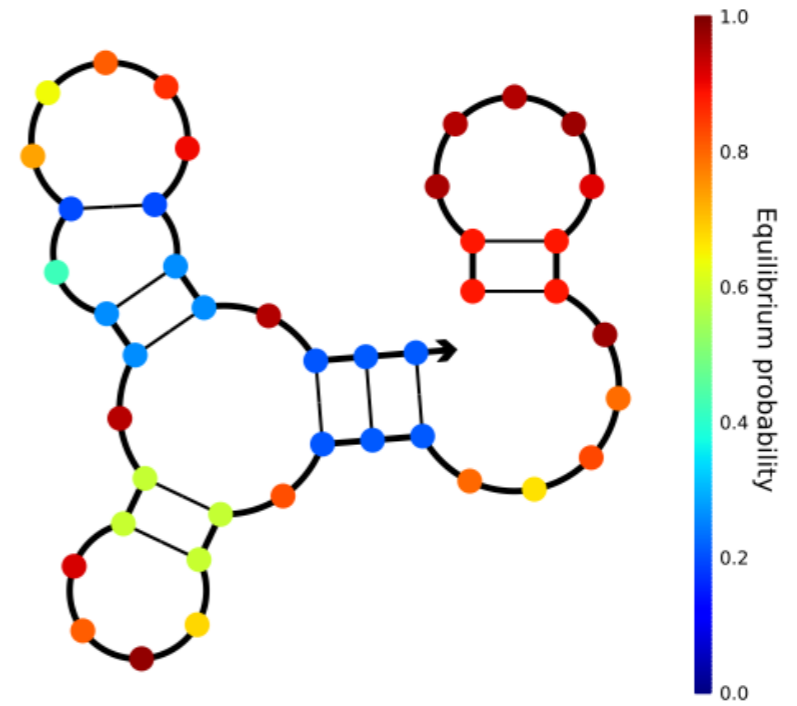

Free energy of secondary structure: -13.64 kcal/mol

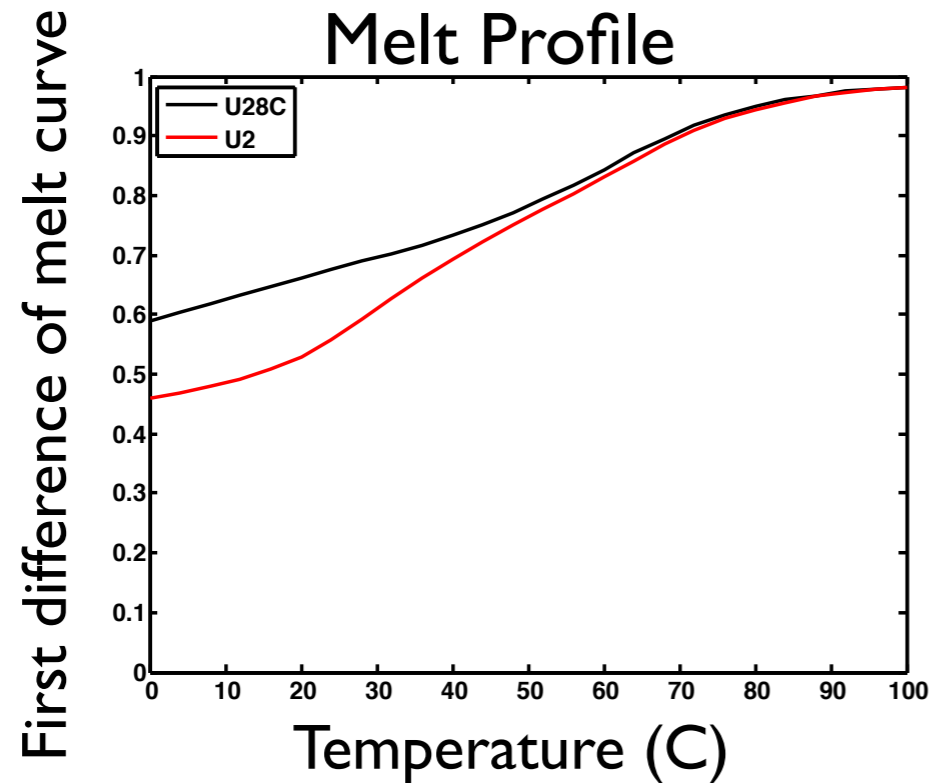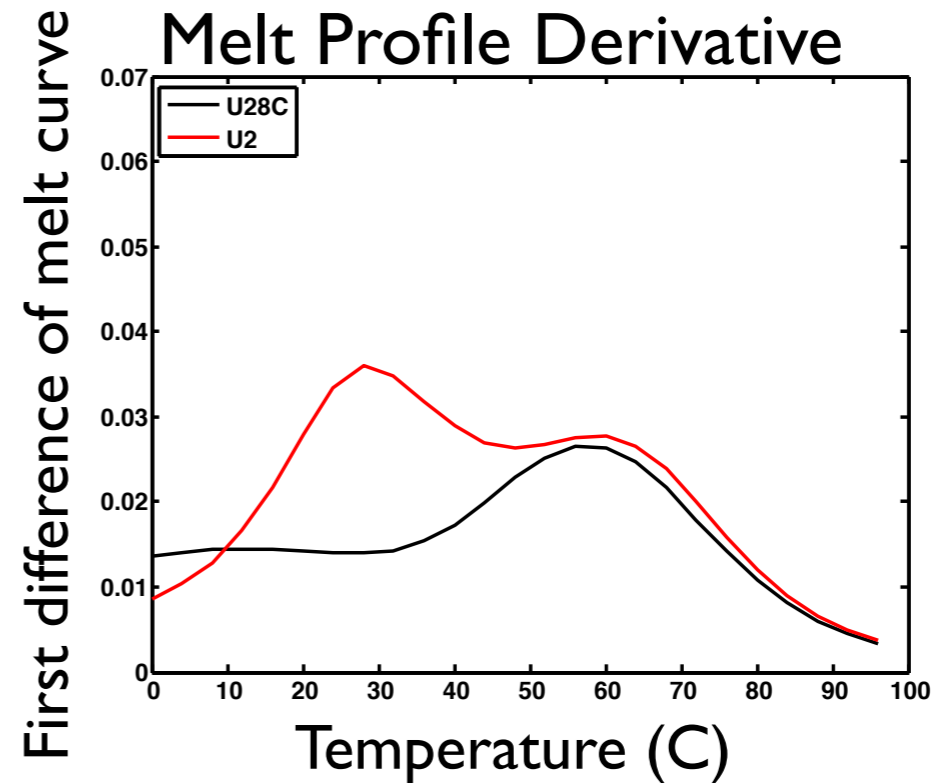

# U28G

Different

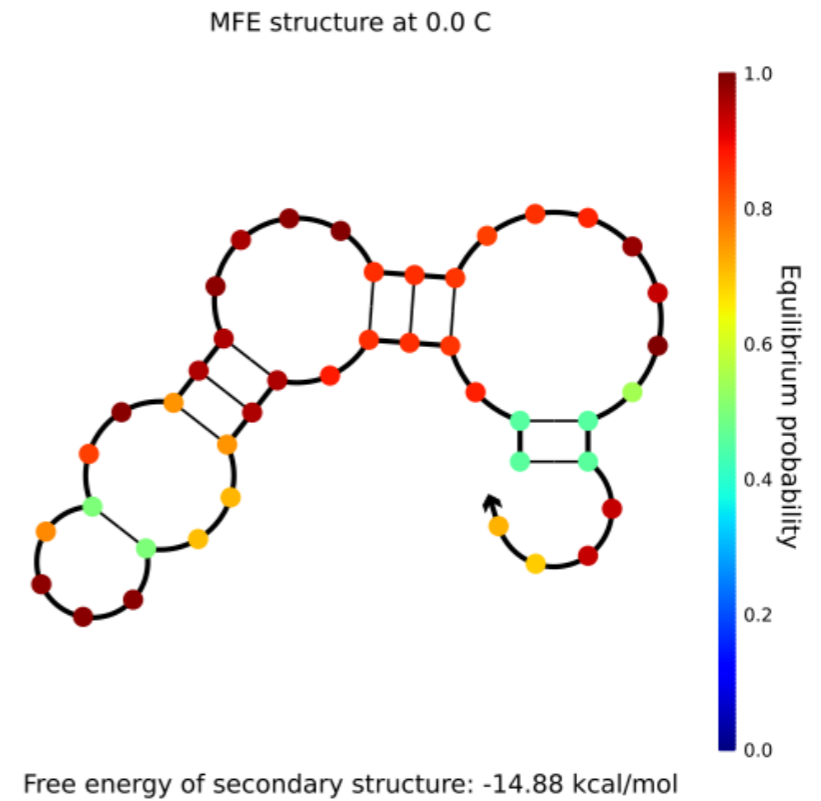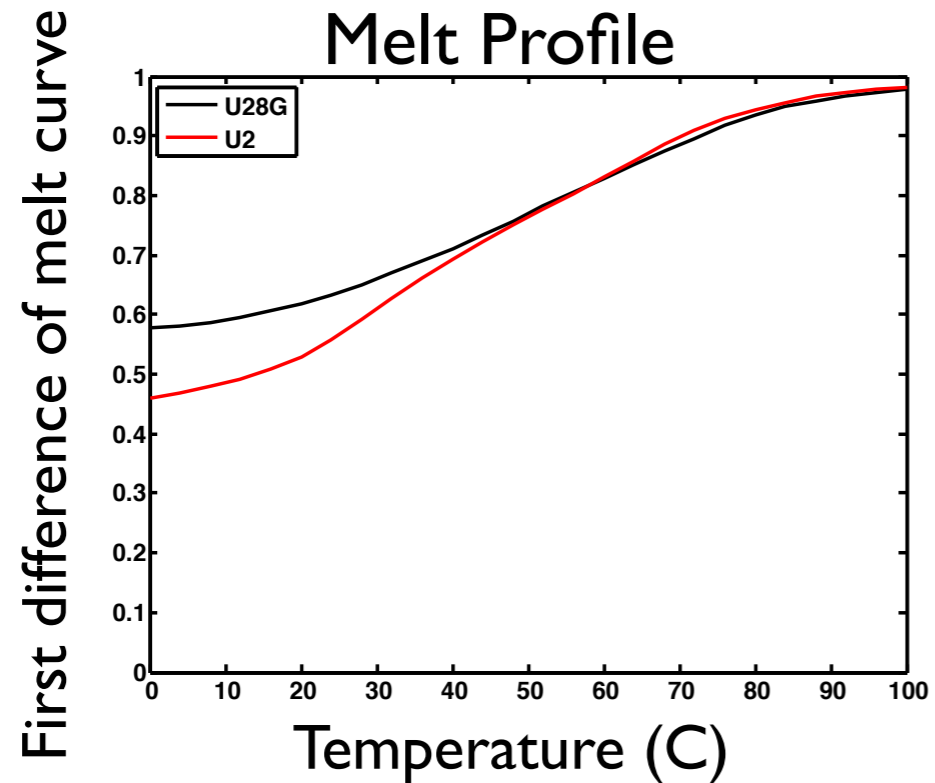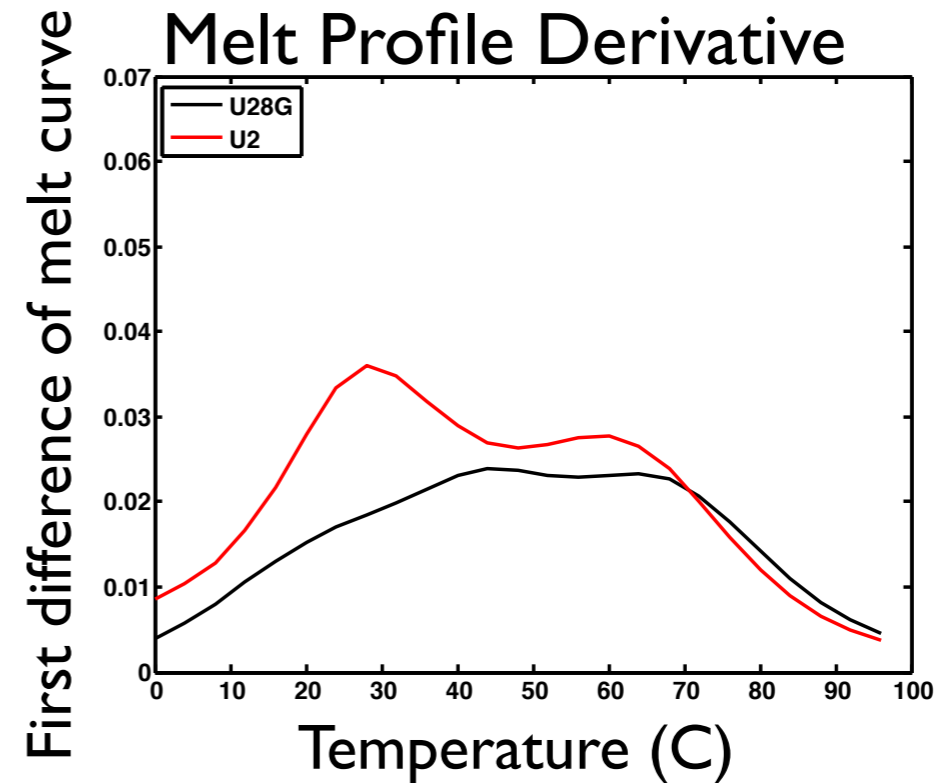

# U290

Different - Threshold, shifted

MFE structure at 0.0 C

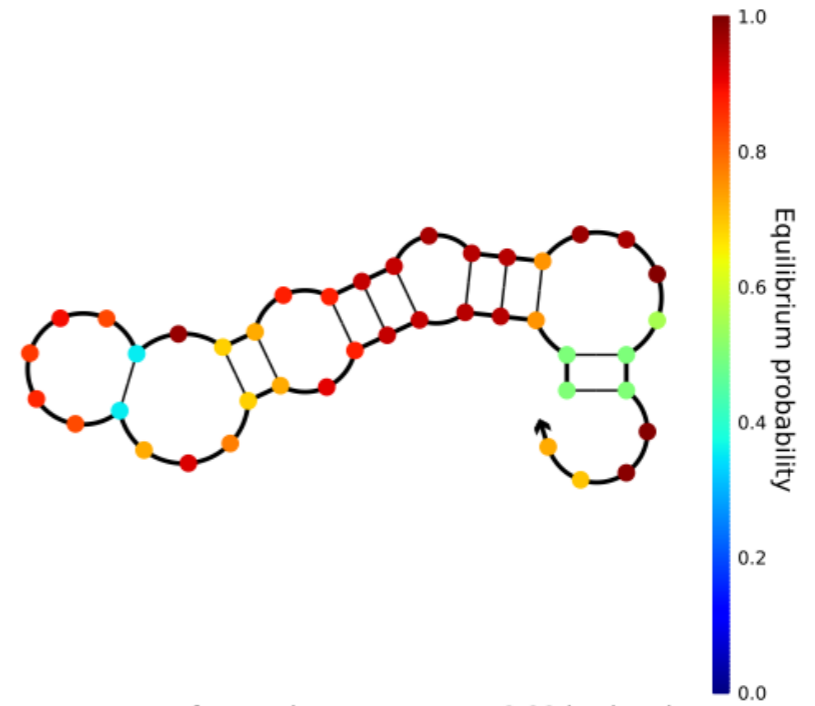

First difference of melt curve

## Melt Profile

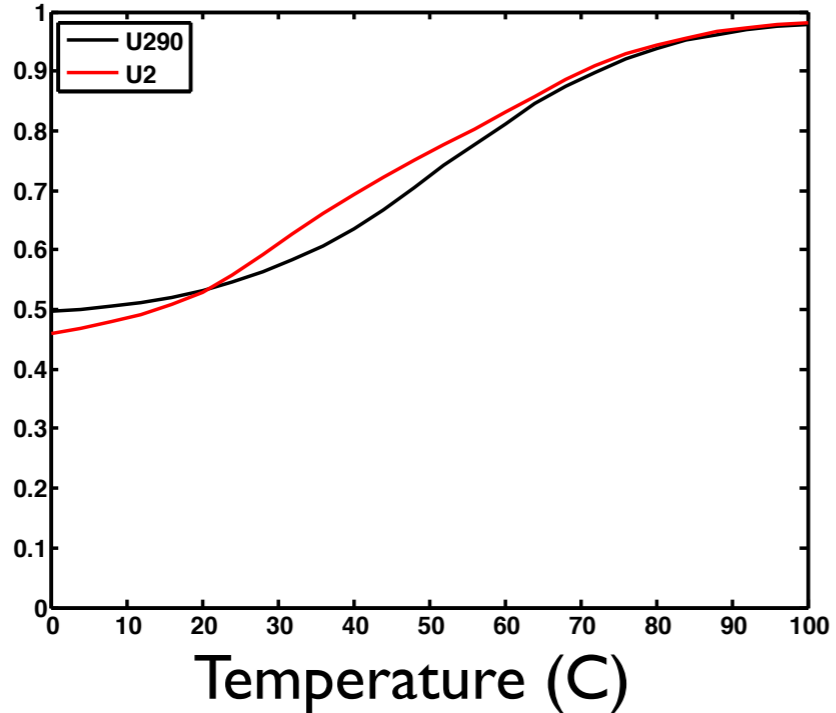

First difference of melt curve

## Melt Profile Derivative

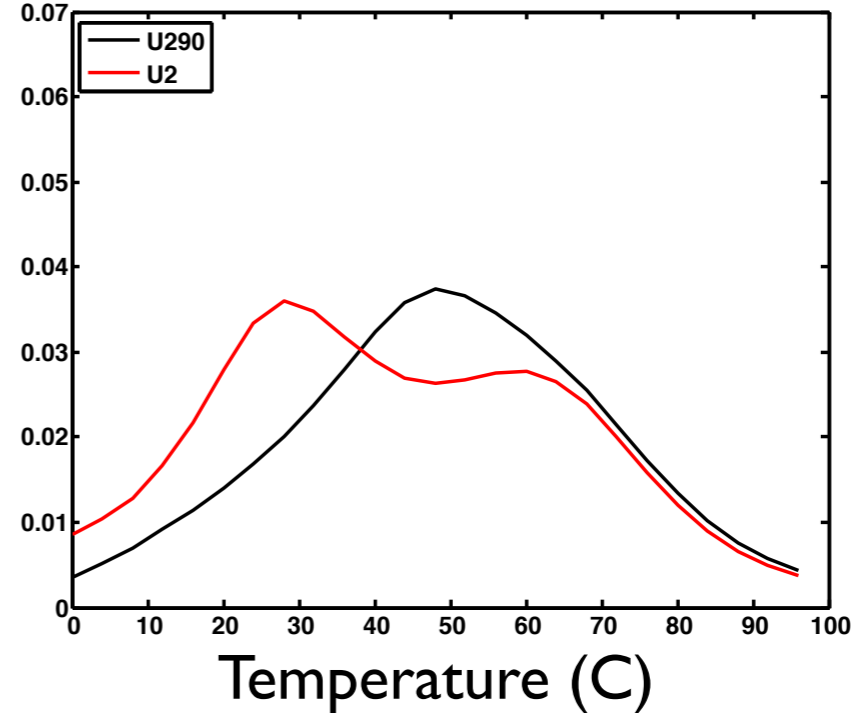



# U29A

Same

MFE structure at 0.0 C

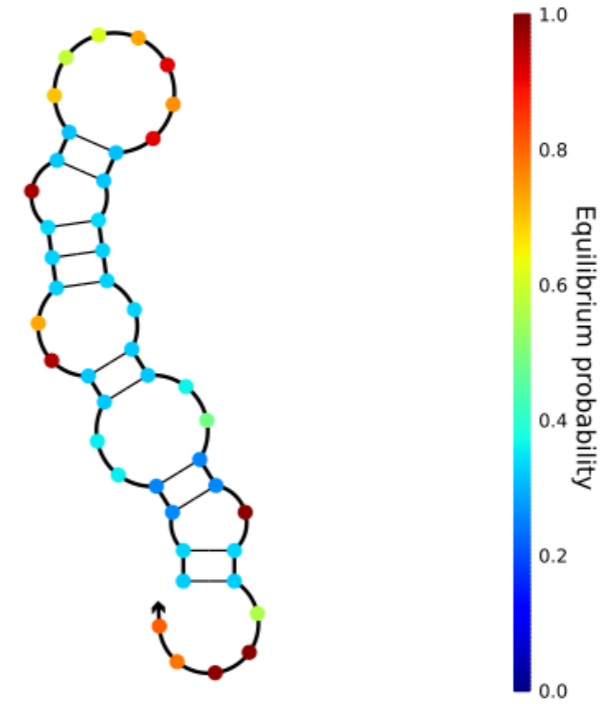

Free energy of secondary structure: -13.49 kcal/mol

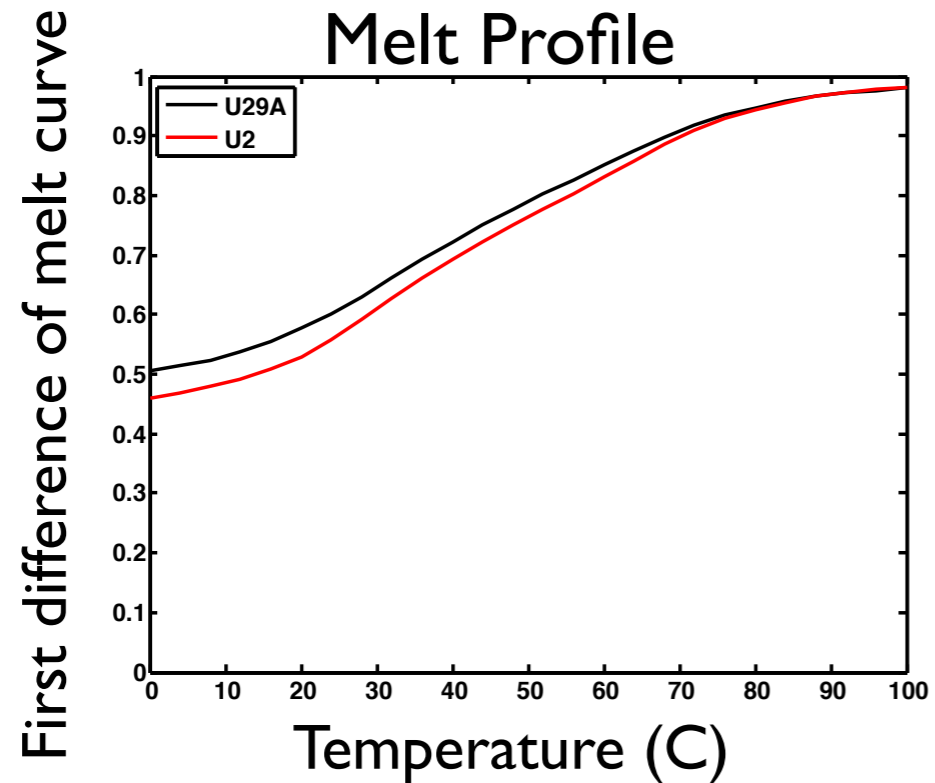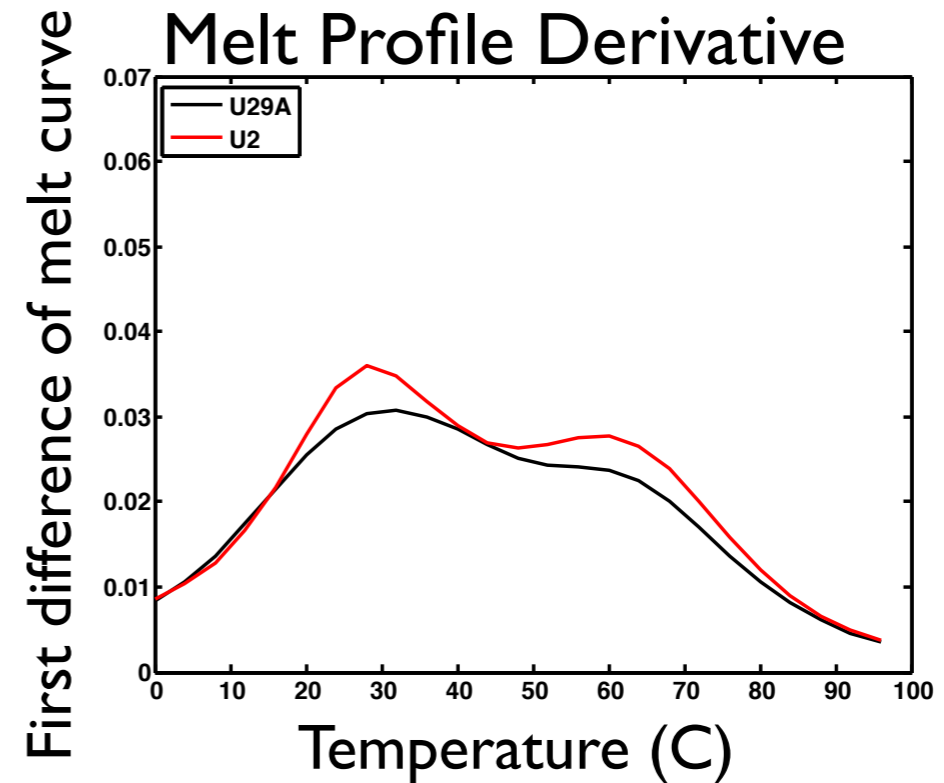

# U29G

Different - Threshold, shifted

MFE structure at 0.0 C

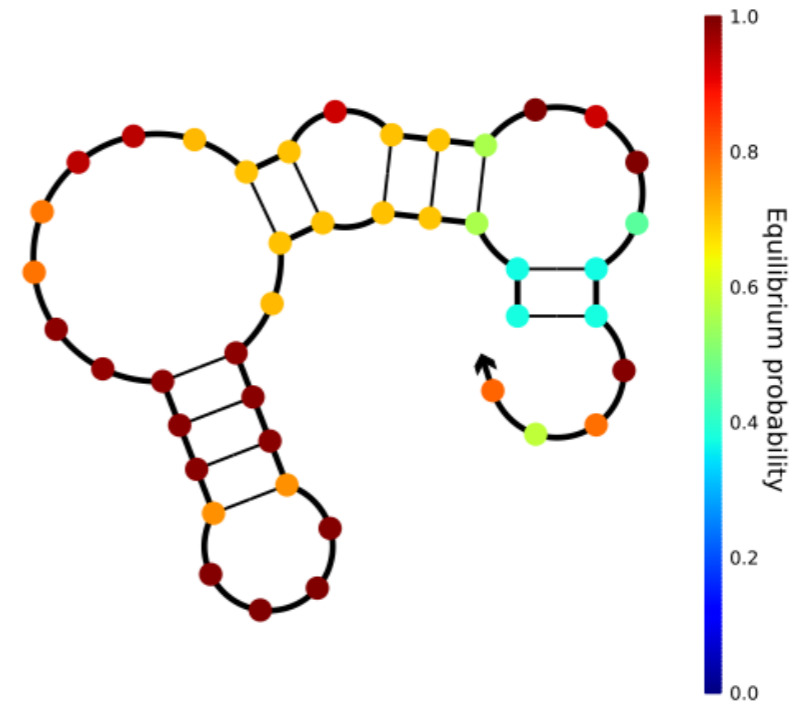

Free energy of secondary structure: -16.16 kcal/mol

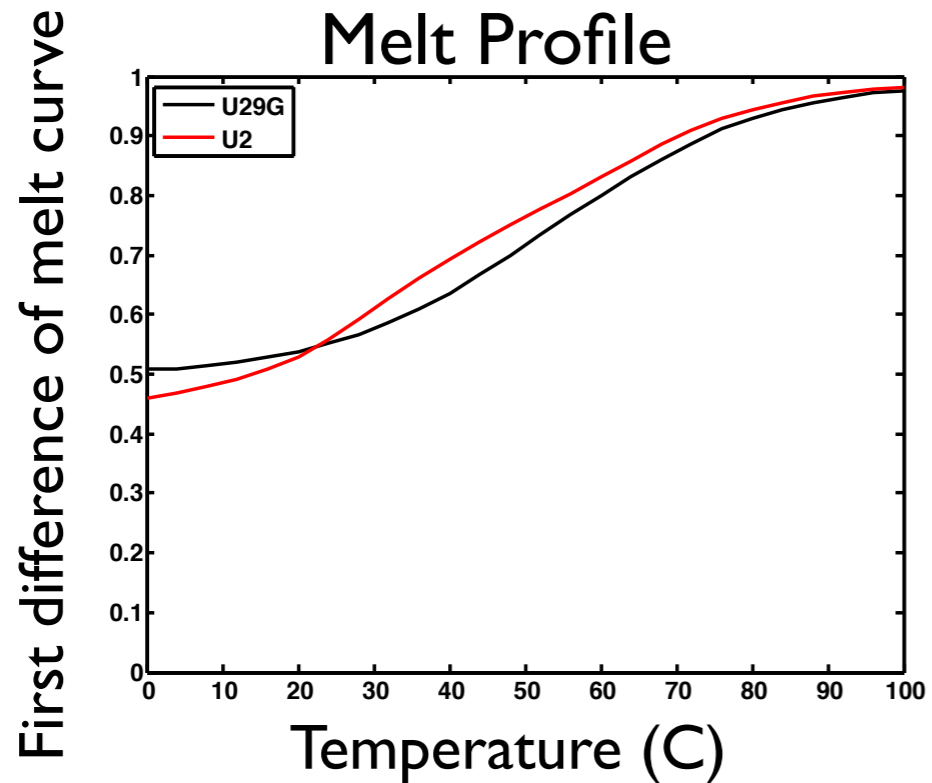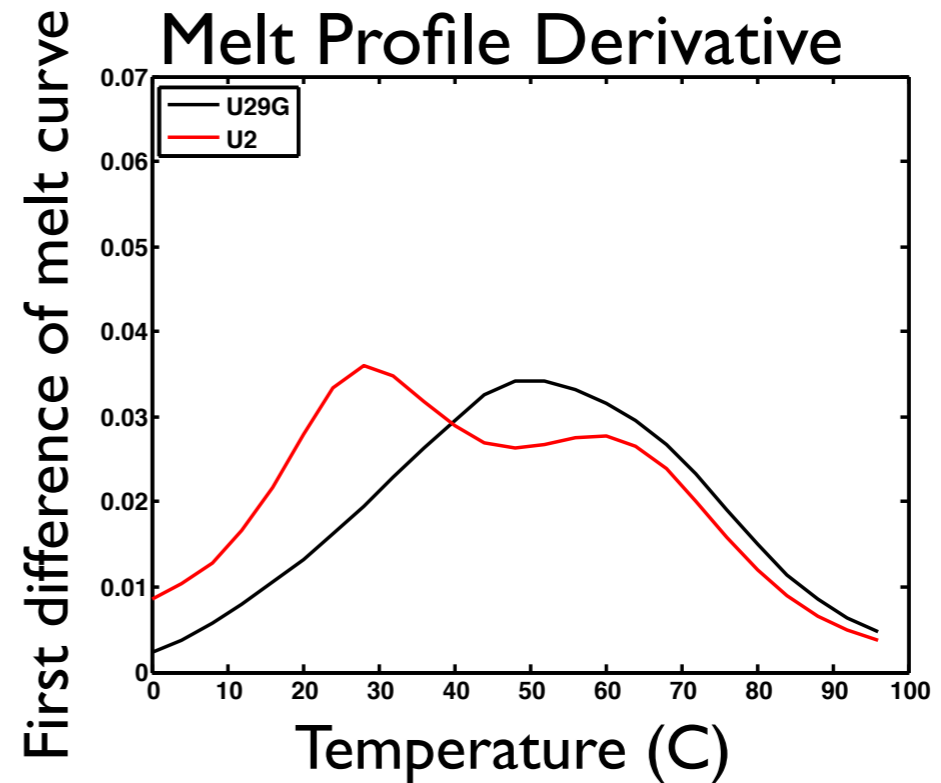

# U29U

Different

MFE structure at 0.0 C

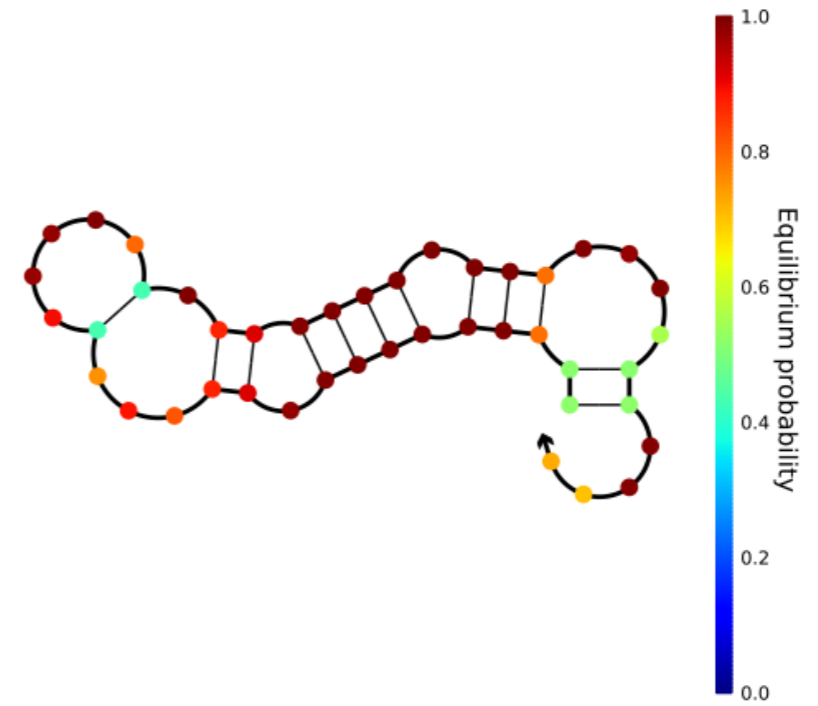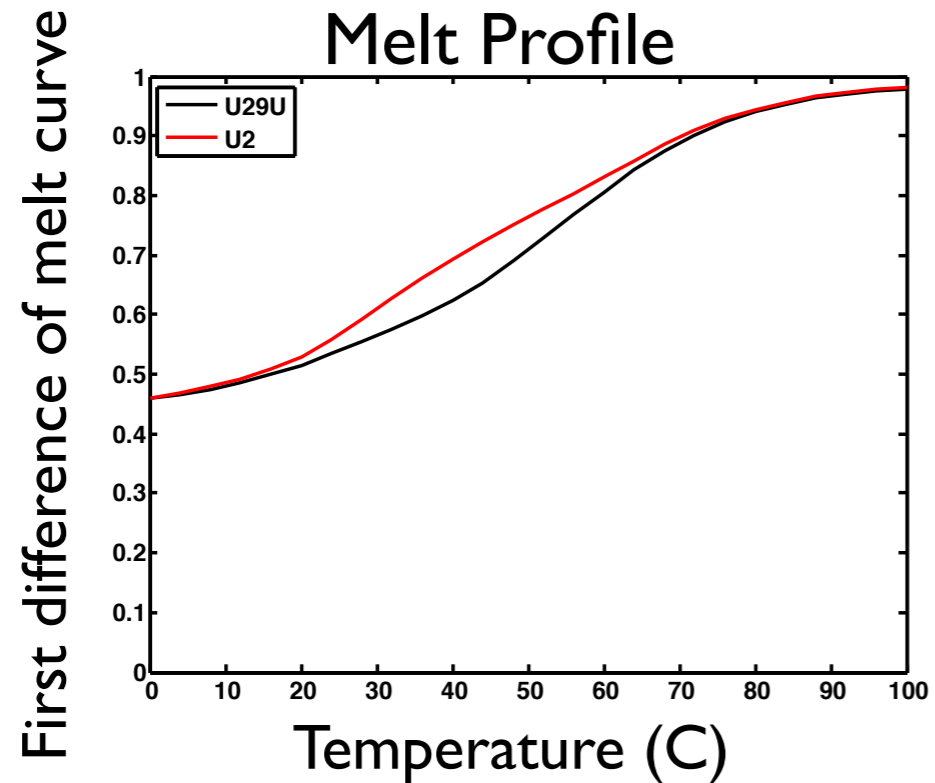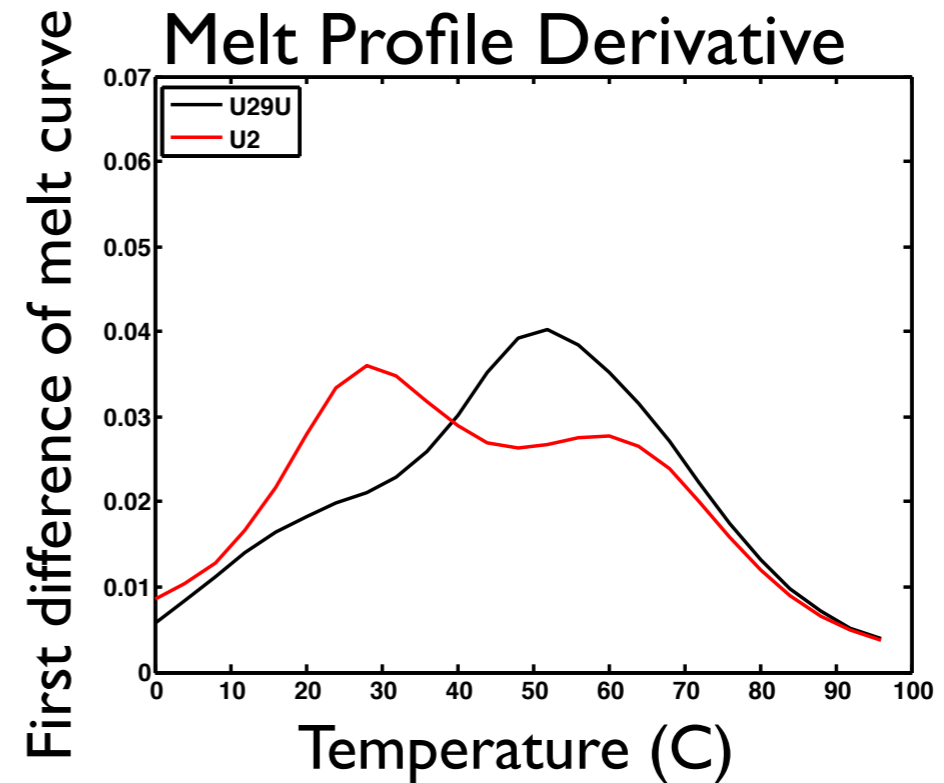

# U2110

Different - linear

MFE structure at 0.0 C

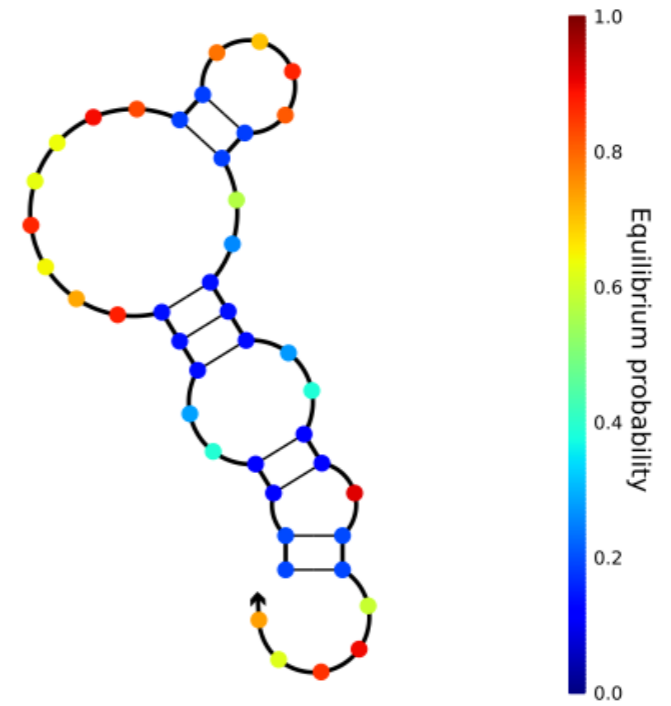

Free energy of secondary structure: -12.64 kcal/mol

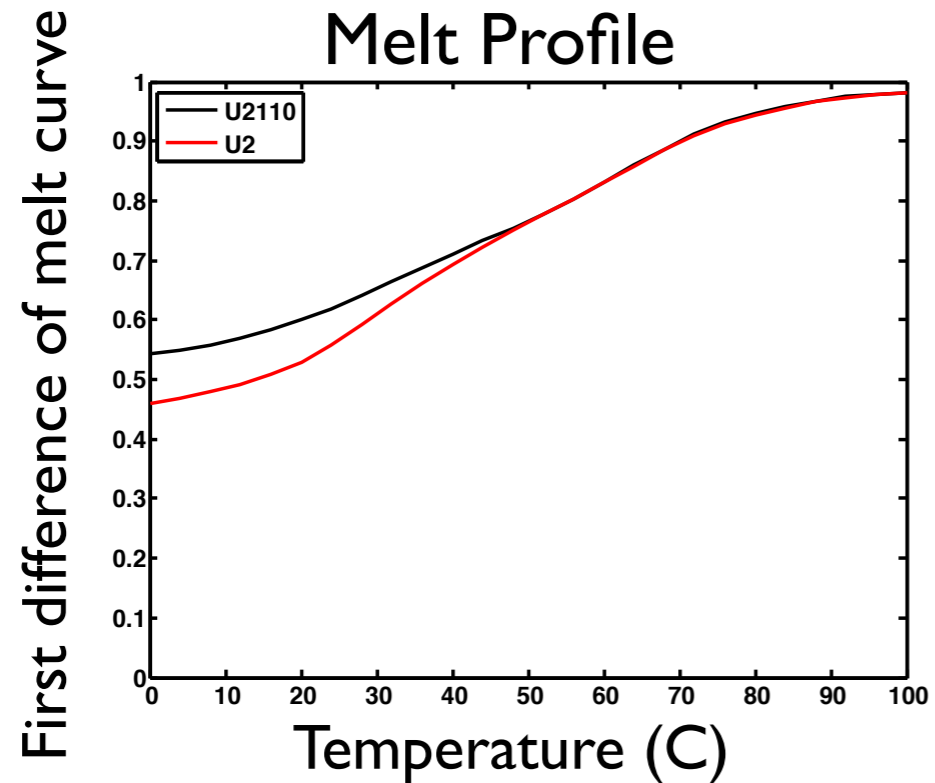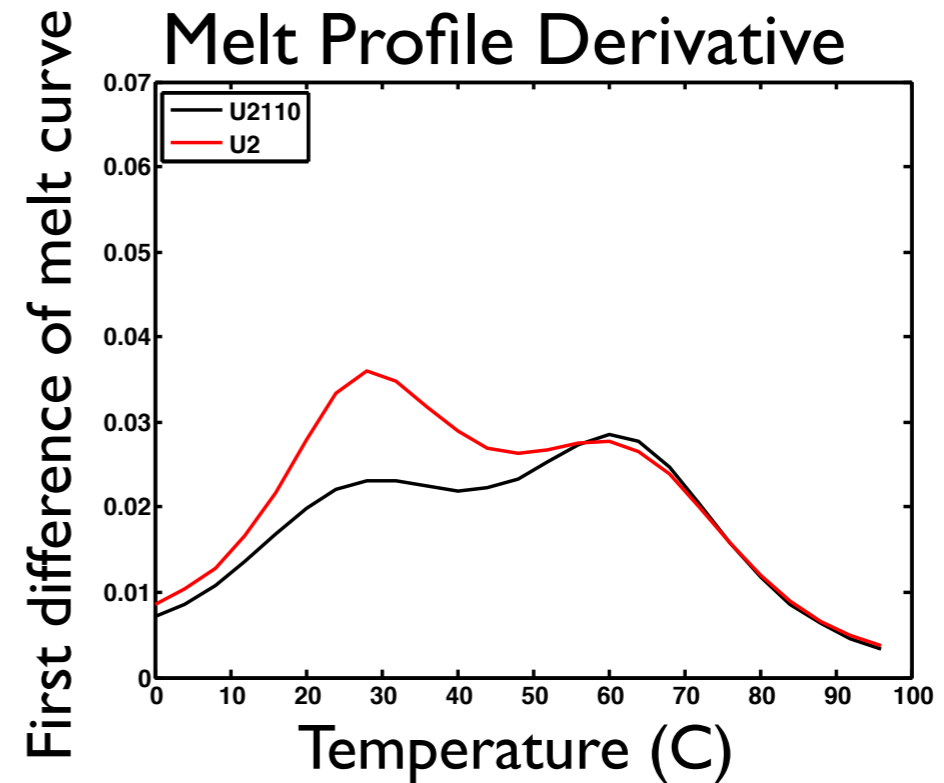

# U211A

Different - Linear

MFE structure at 0.0 C

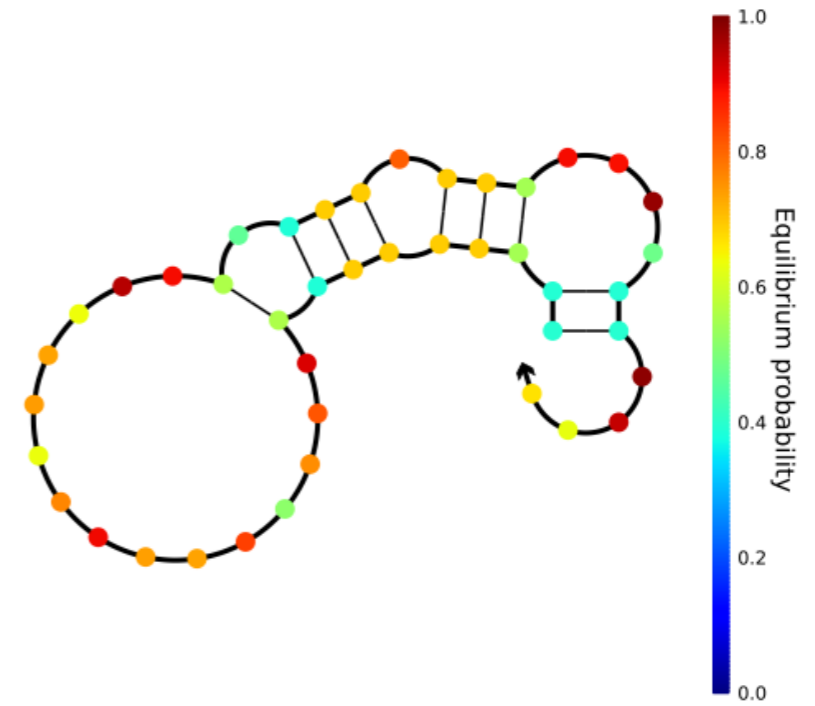

Free energy of secondary structure: -12.49 kcal/mol

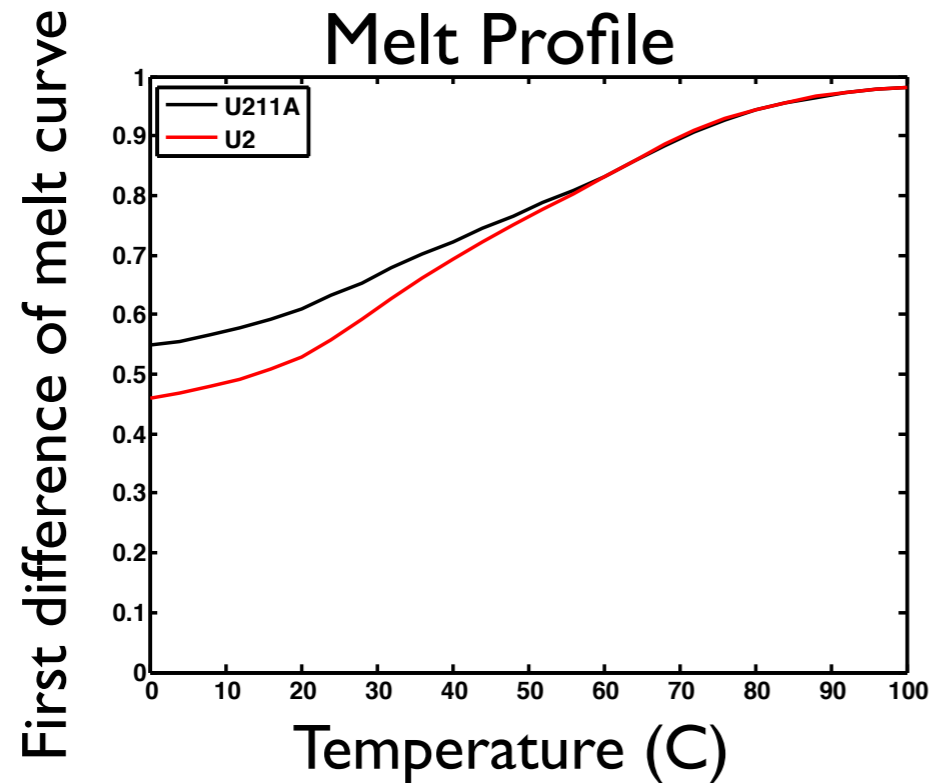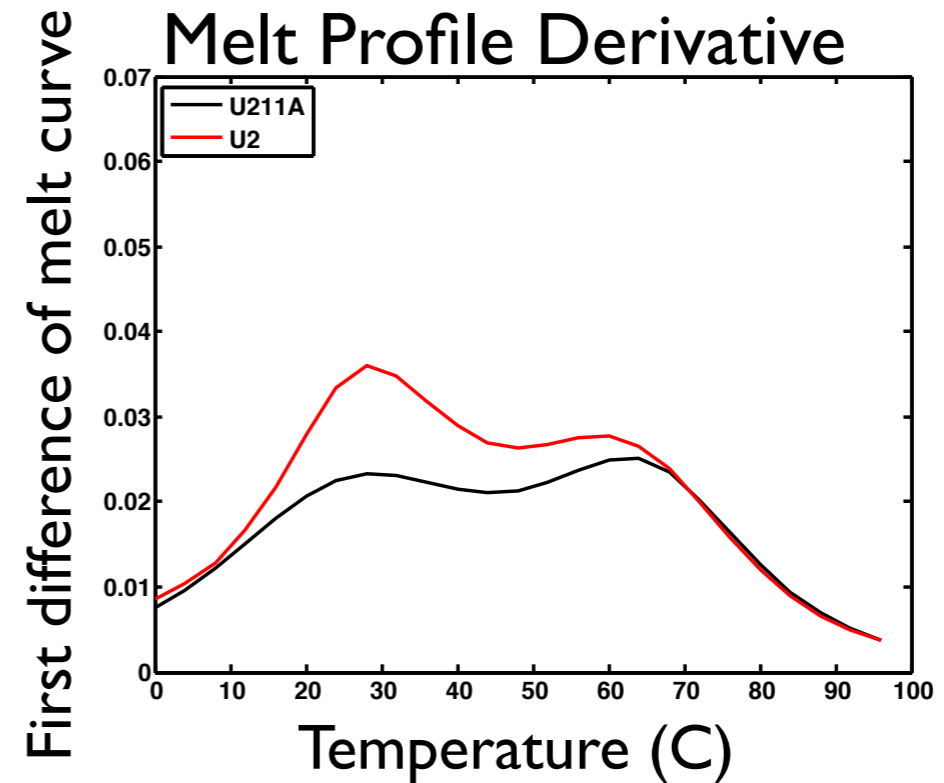

# U211G

Different - shifted down

MFE structure at 0.0 C

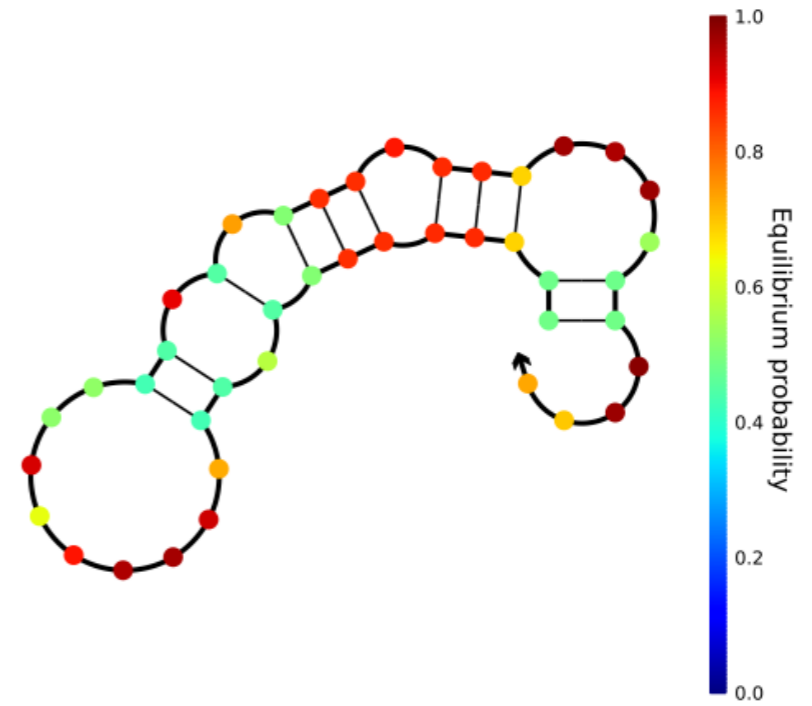

Free energy of secondary structure: -14.08 kcal/mol

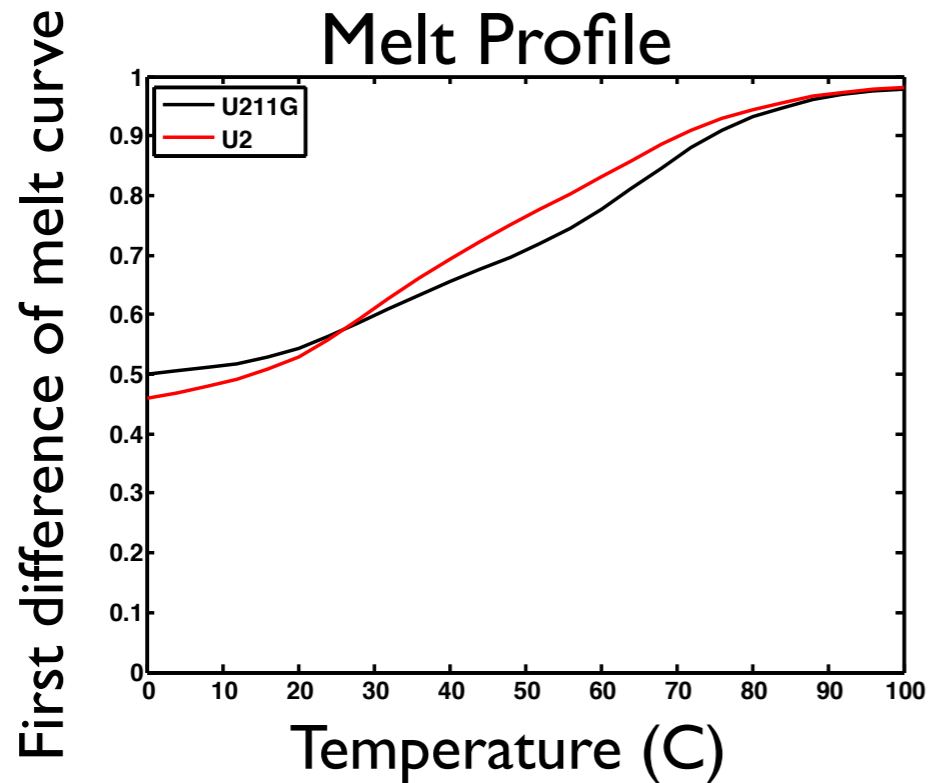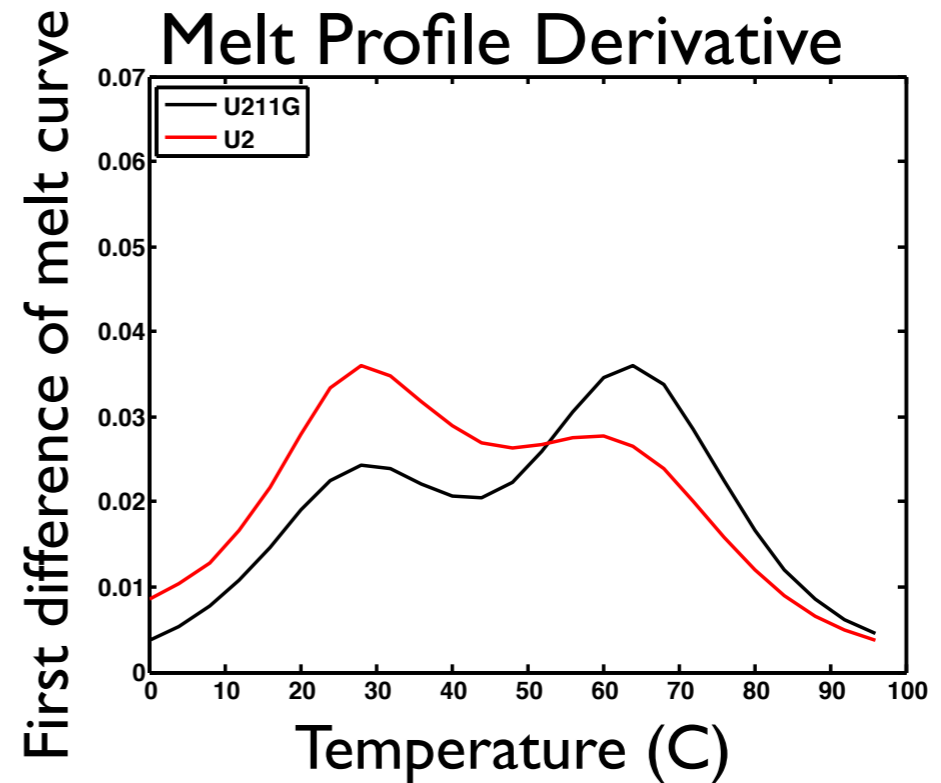

# U211U

Different - Linear

MFE structure at 0.0 C

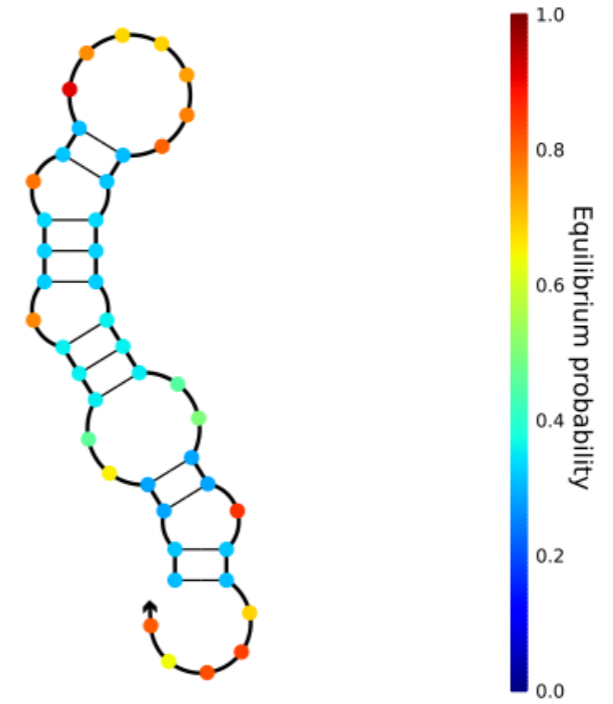

Free energy of secondary structure: -13.86 kcal/mol

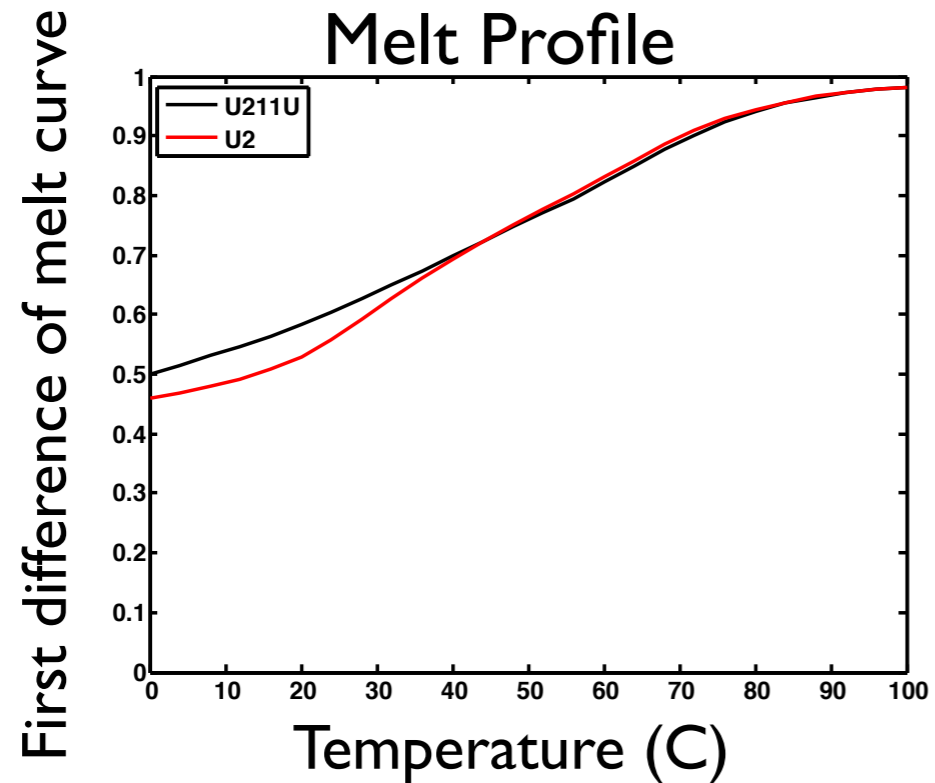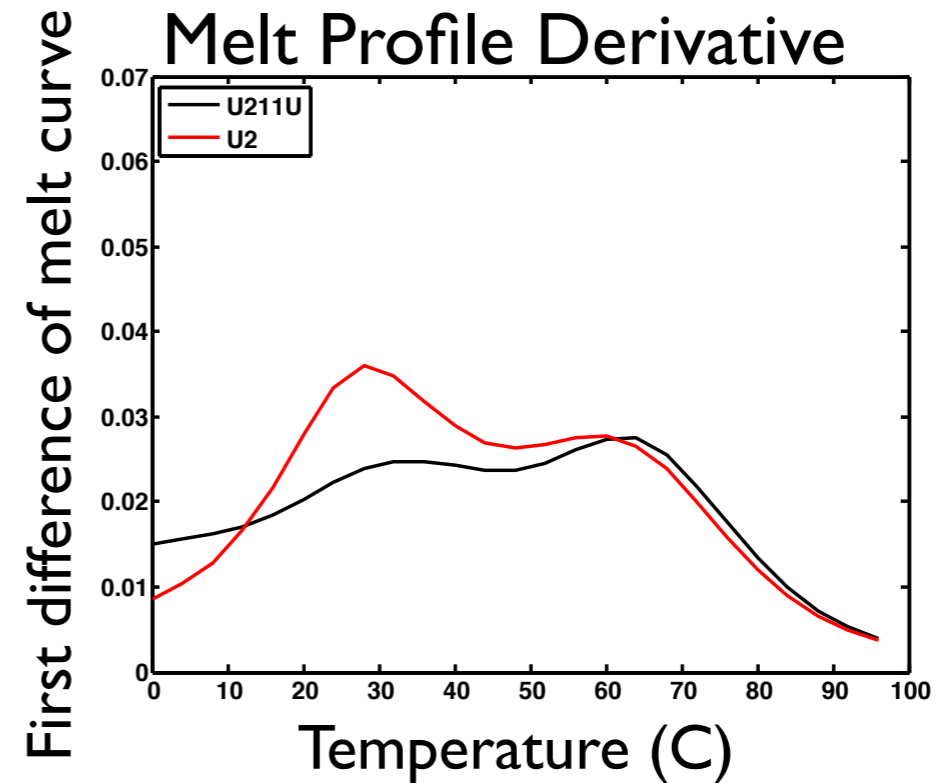

# U2120

Different - shifted

MFE structure at 0.0 C

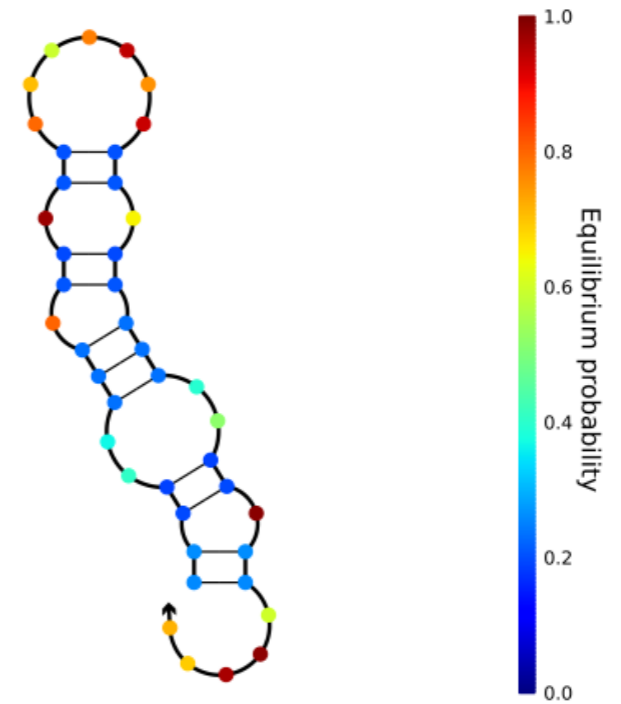

Free energy of secondary structure: -13.75 kcal/mol

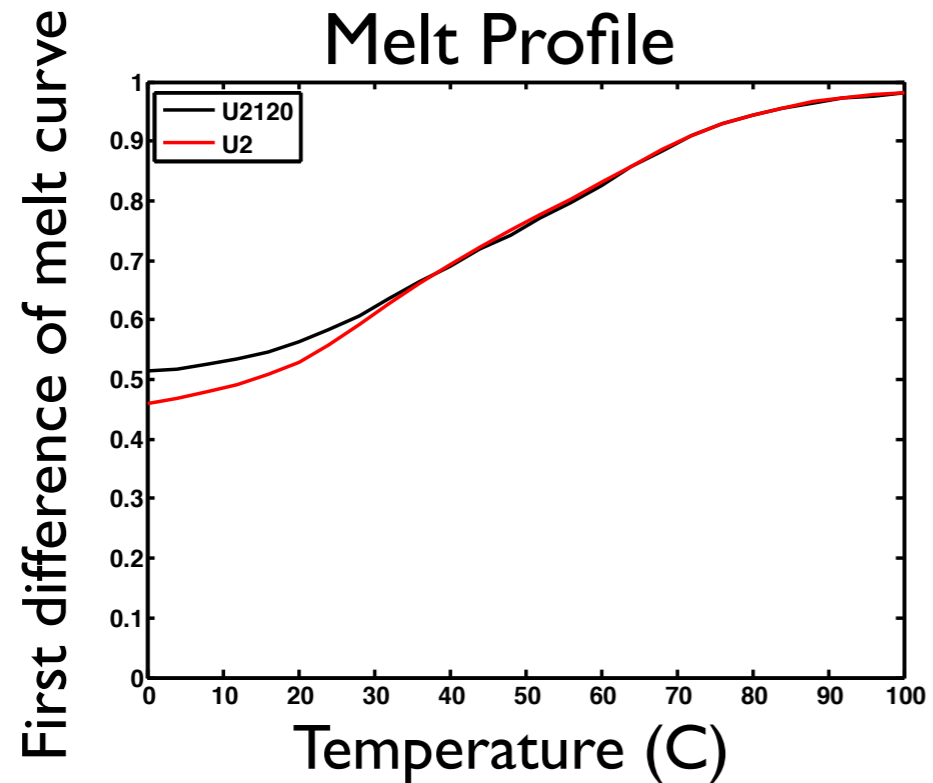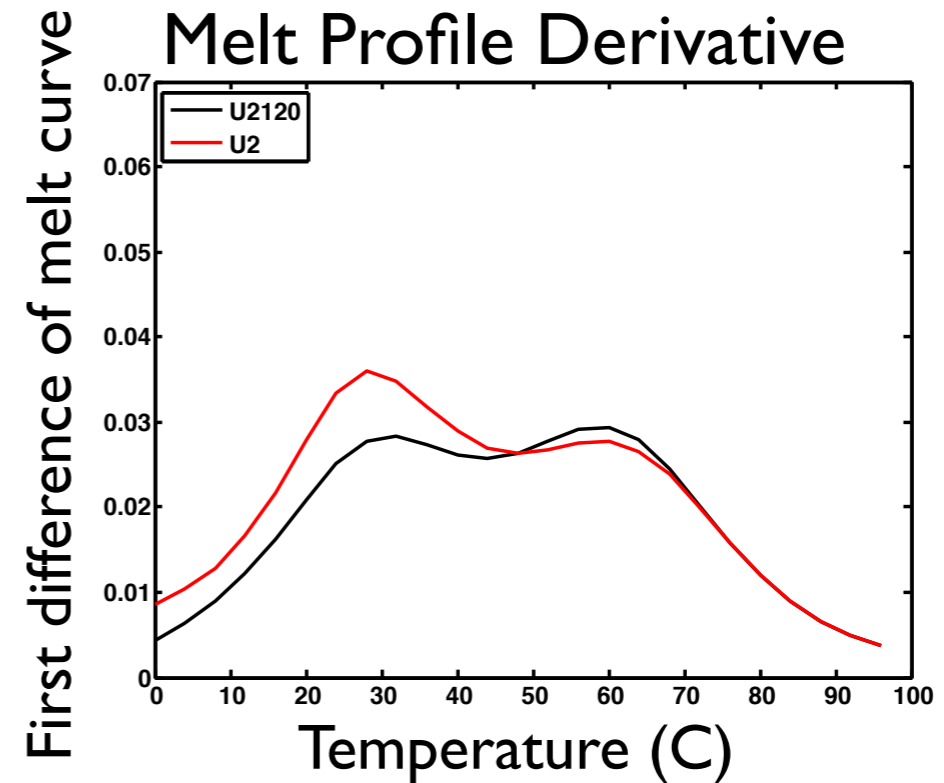



# U212A

Same

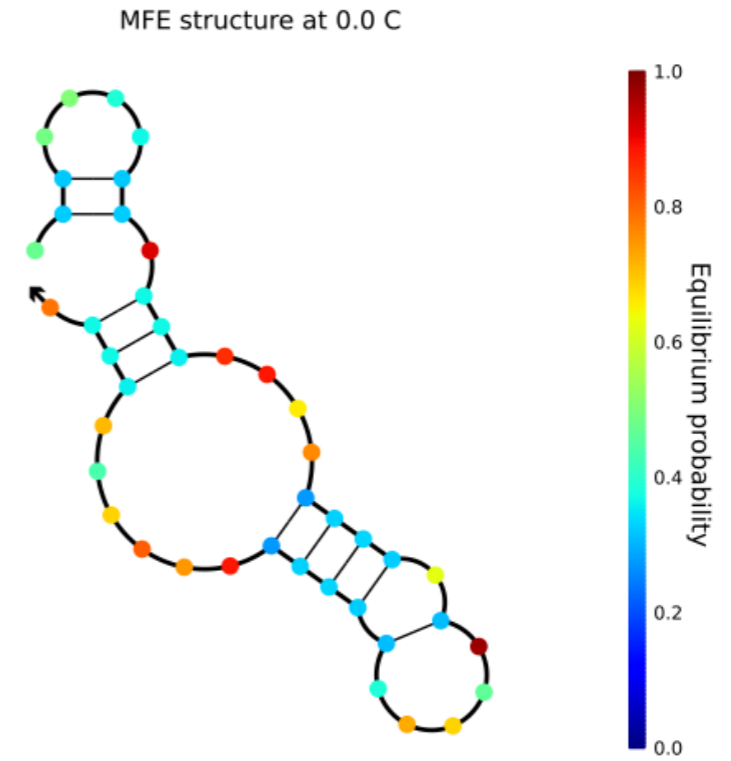

Free energy of secondary structure: -13.78 kcal/mol

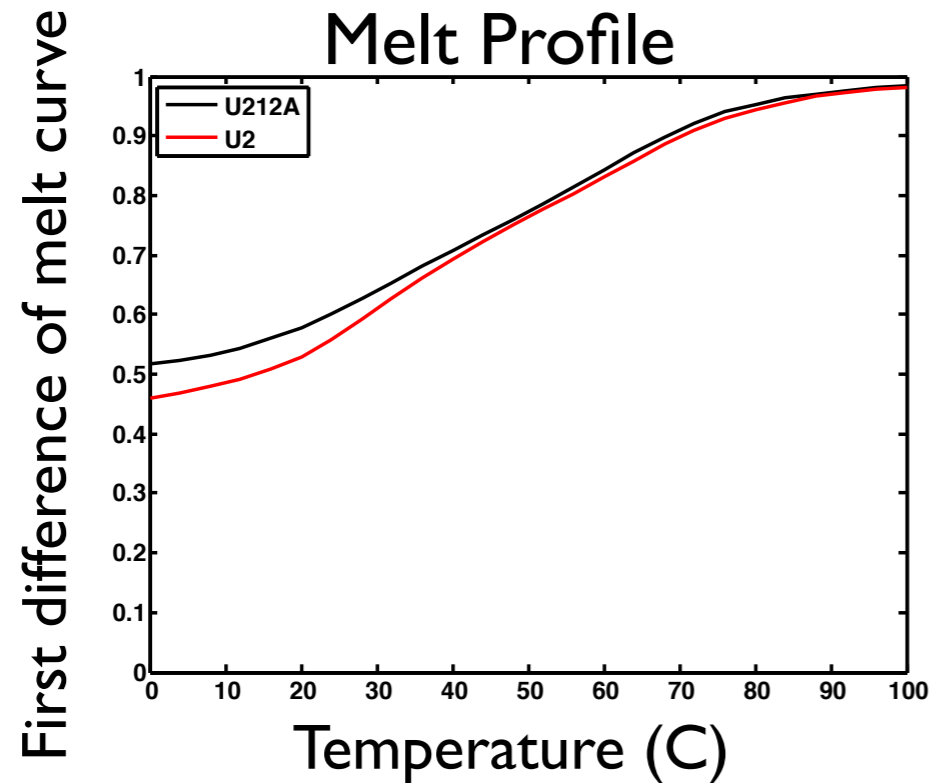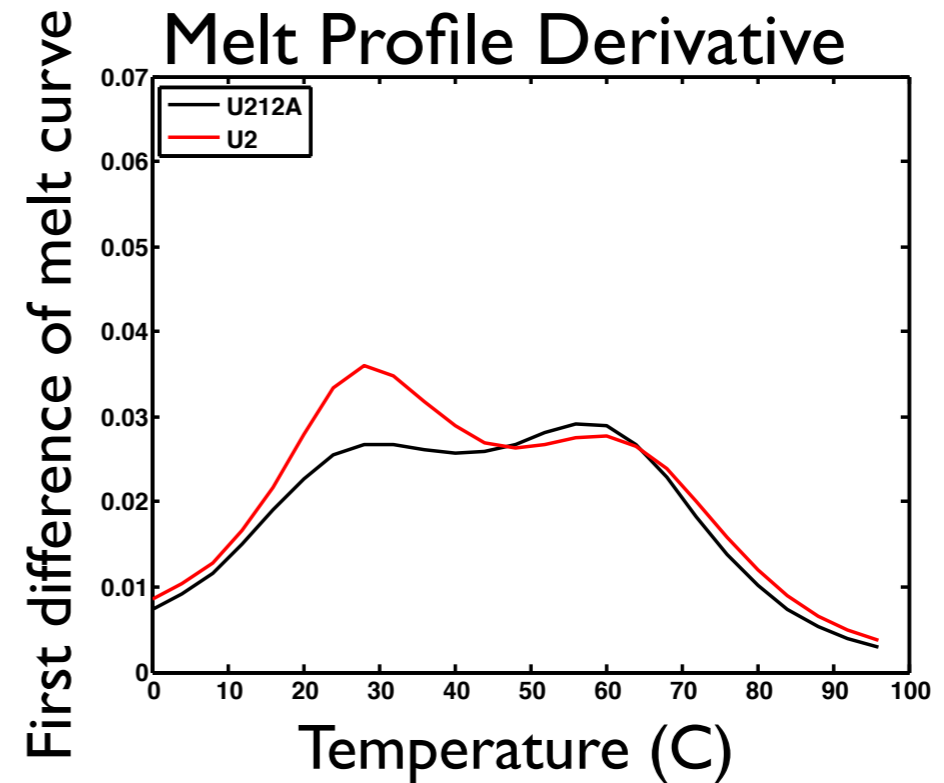

# U212C

Different - Linear  
Note Temperature Range

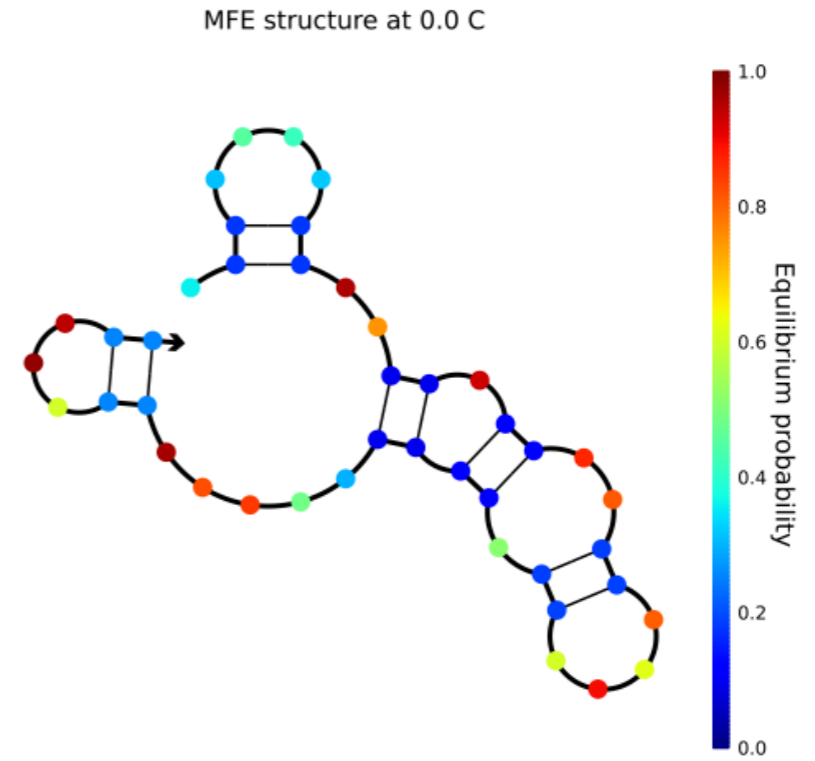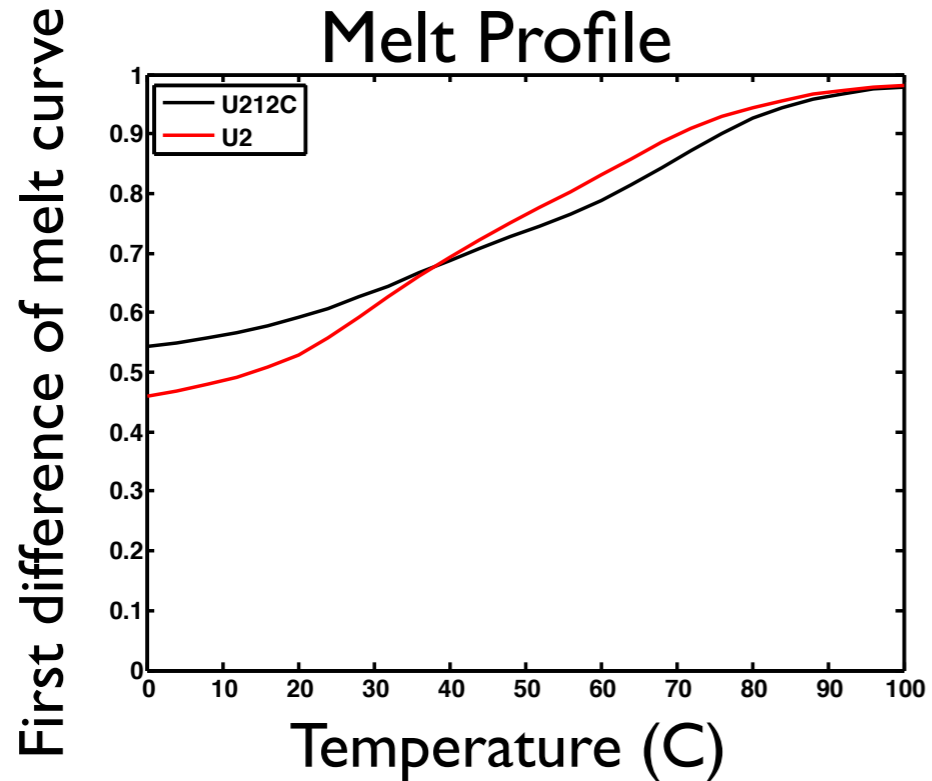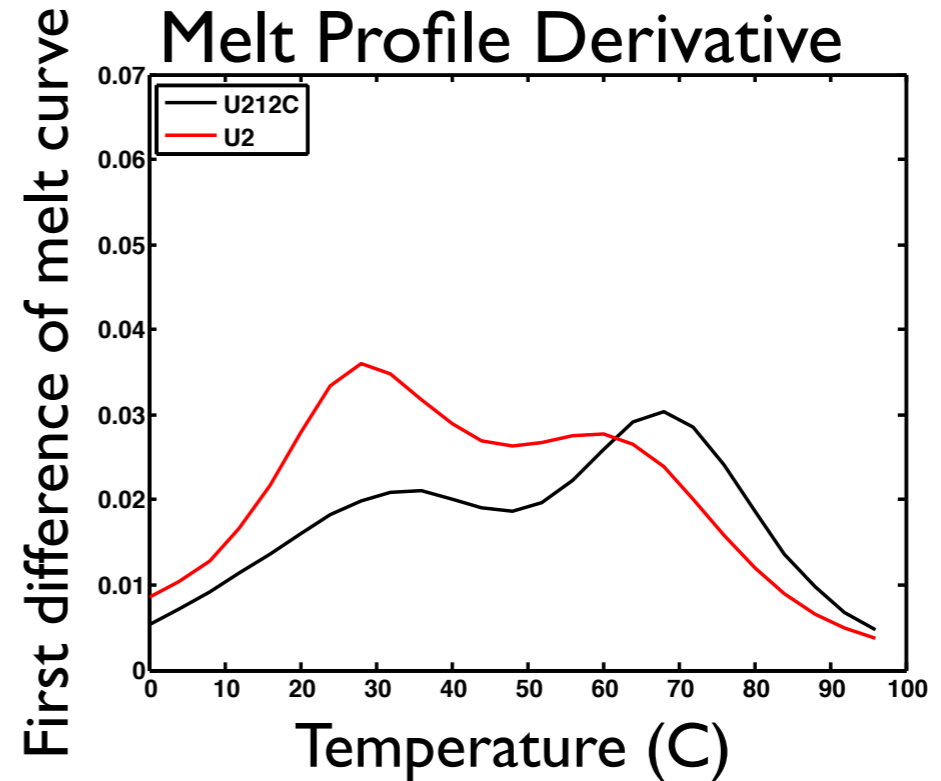

# U212G

Different - Linear

MFE structure at 0.0 C

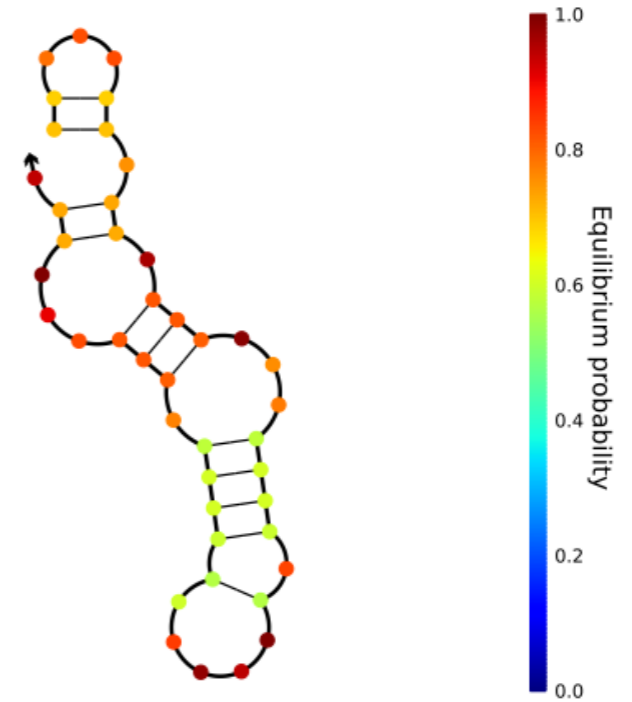

Free energy of secondary structure: -16.24 kcal/mol

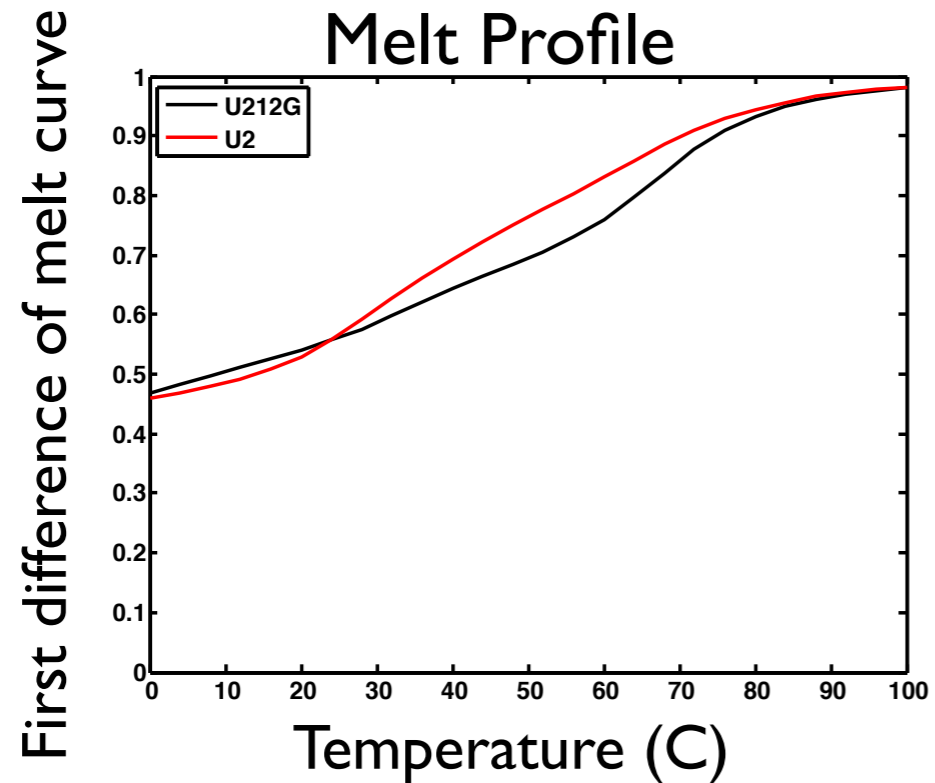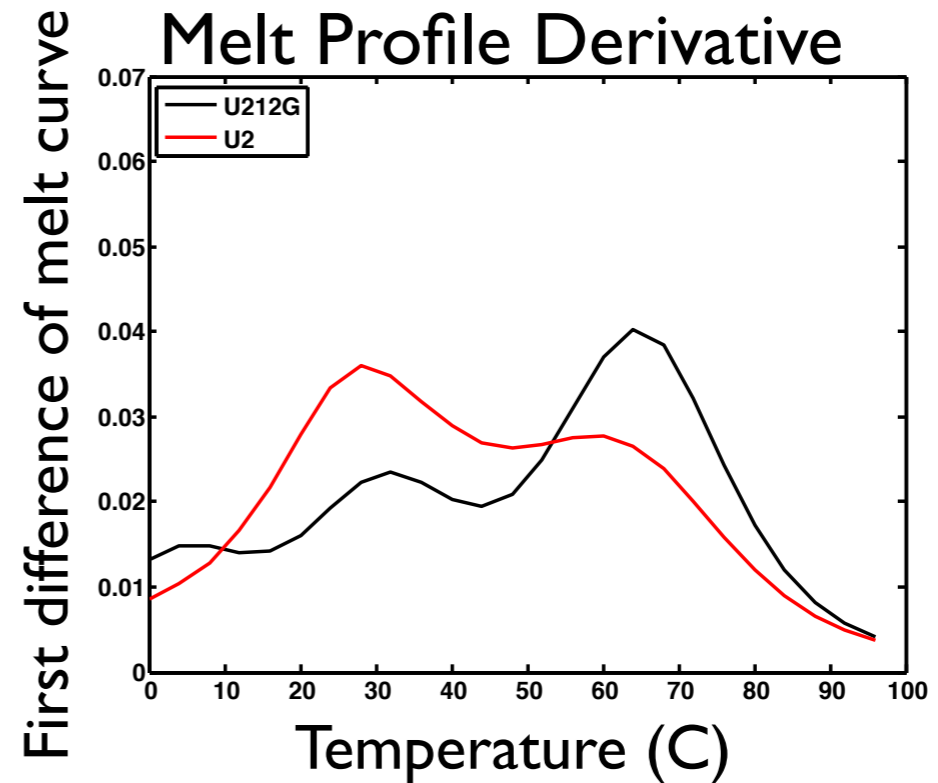

# U2130

Same

MFE structure at 0.0 C

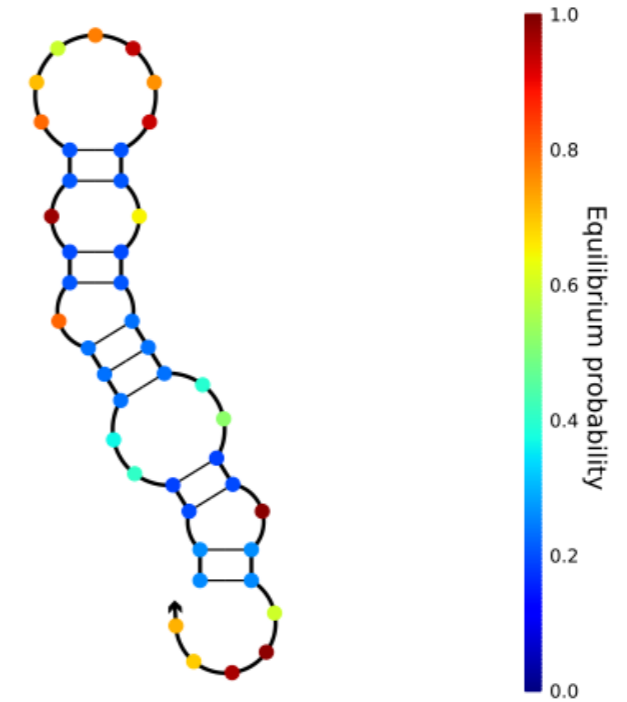

Free energy of secondary structure: -13.75 kcal/mol

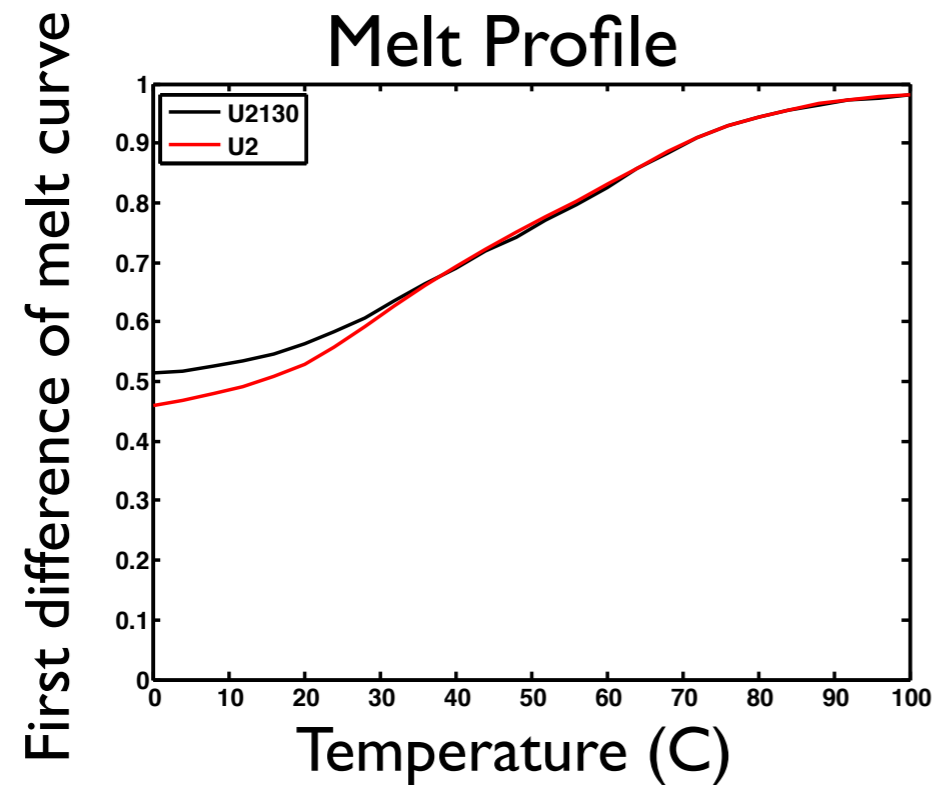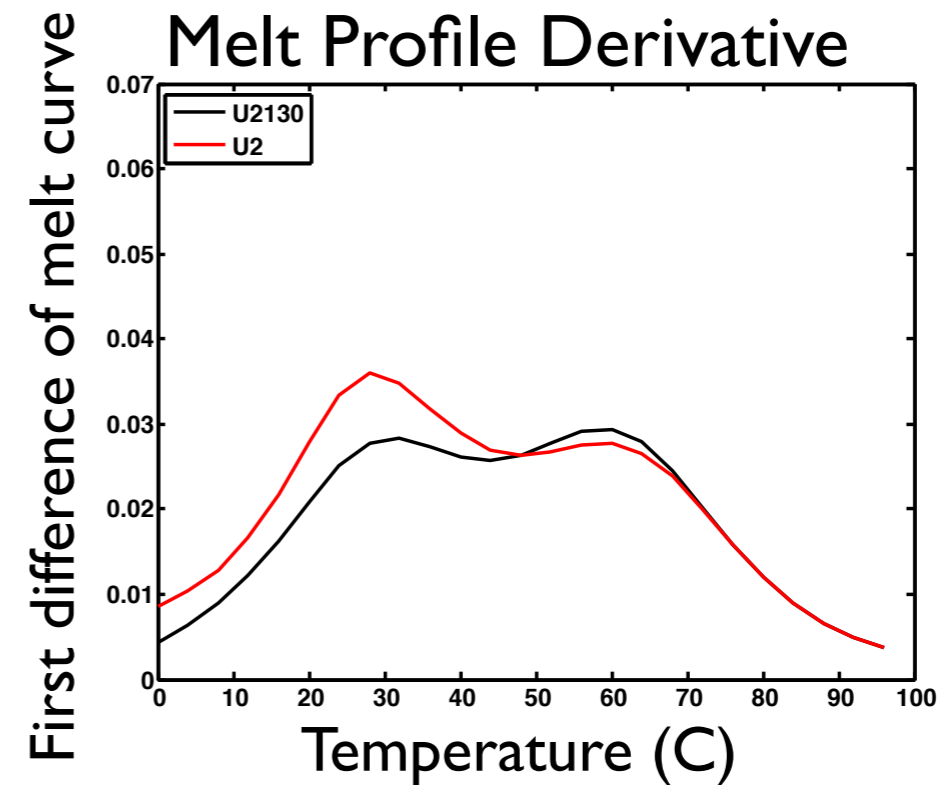

# U213A

Same

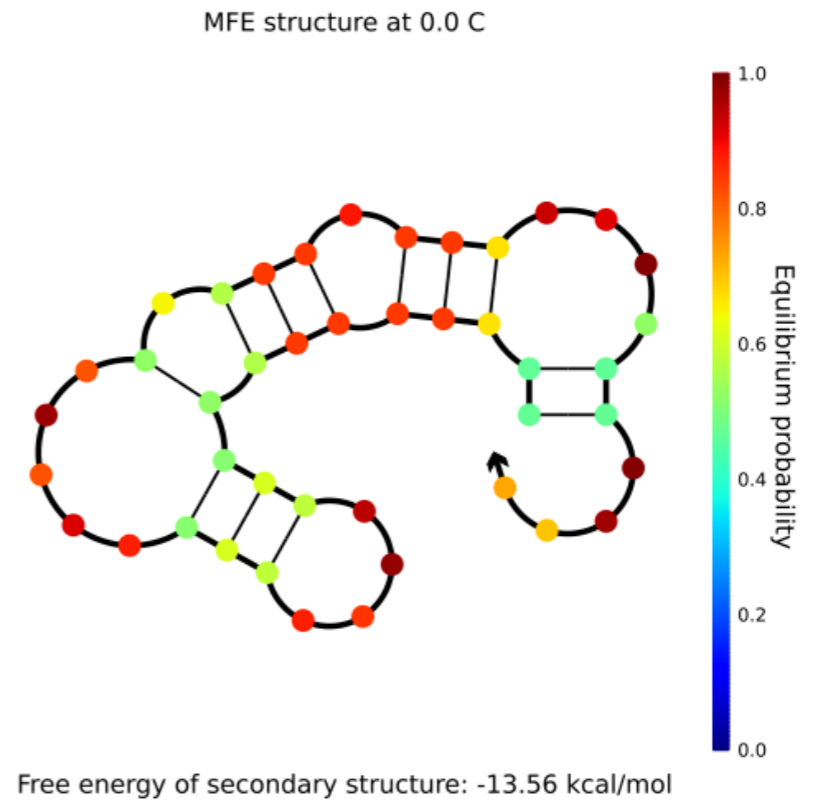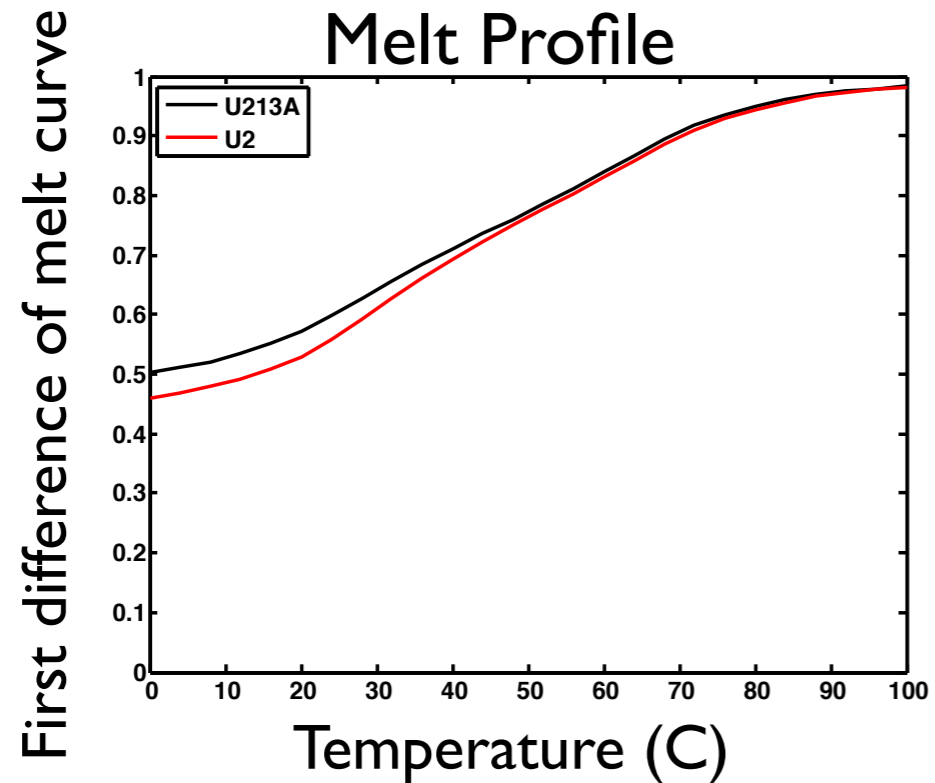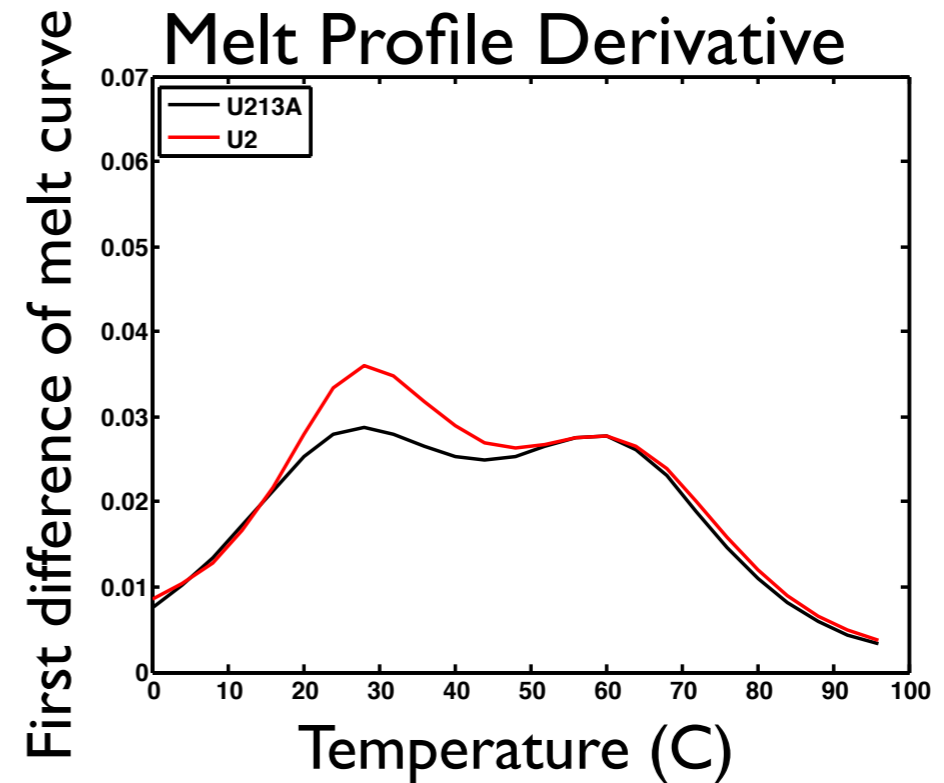

# U213C

Same

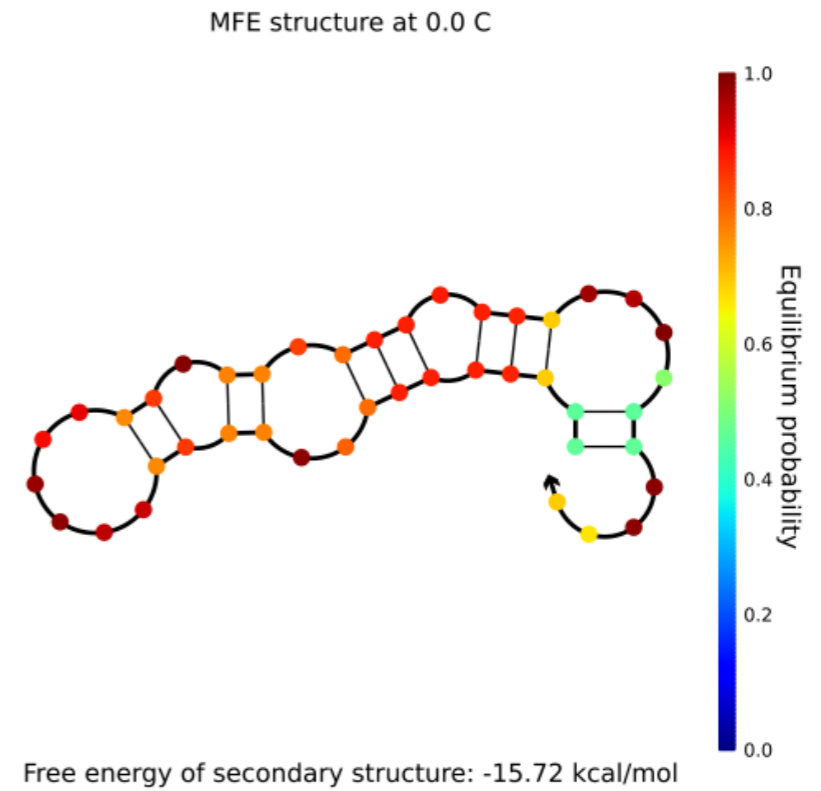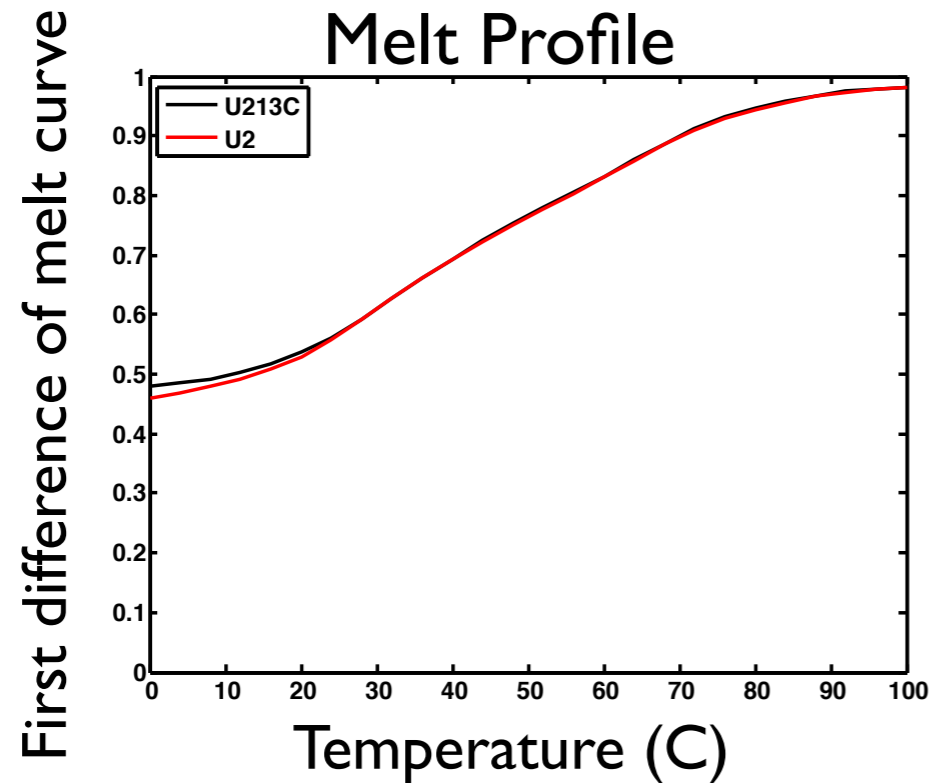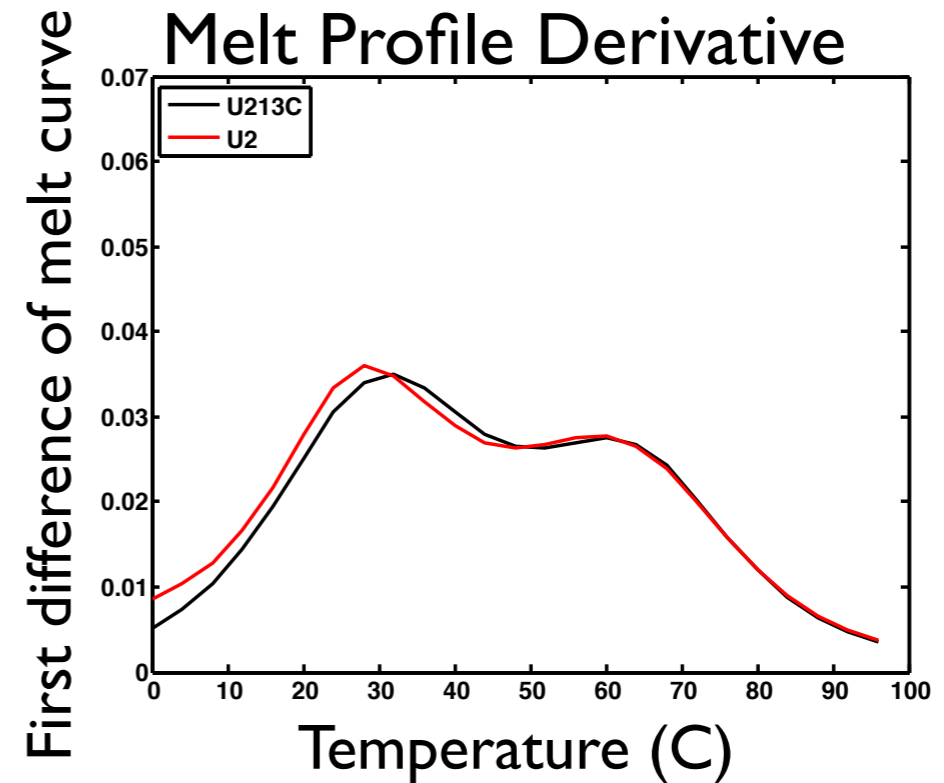

# U213G

Different - Threshold, shifted

MFE structure at 0.0 C

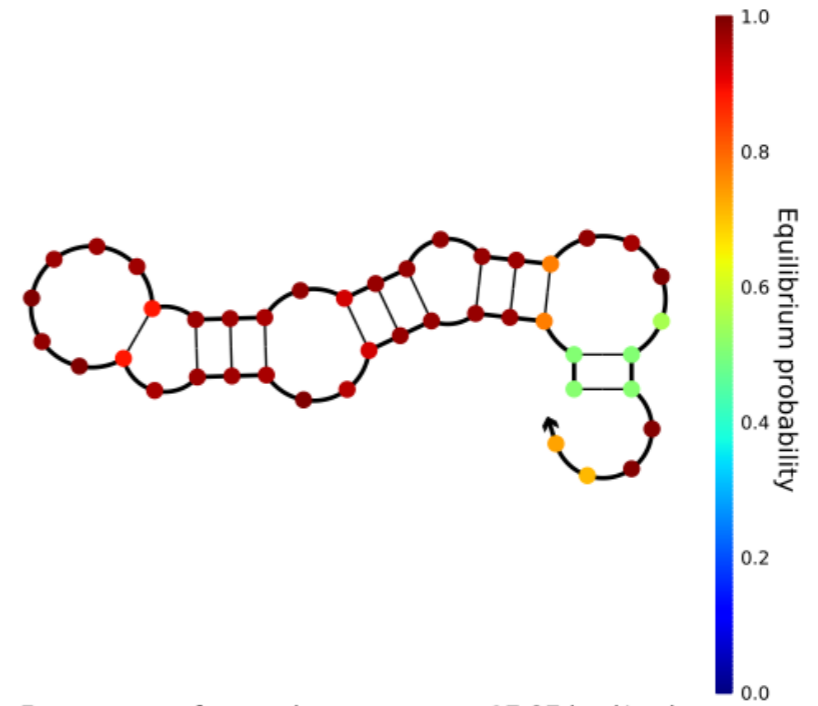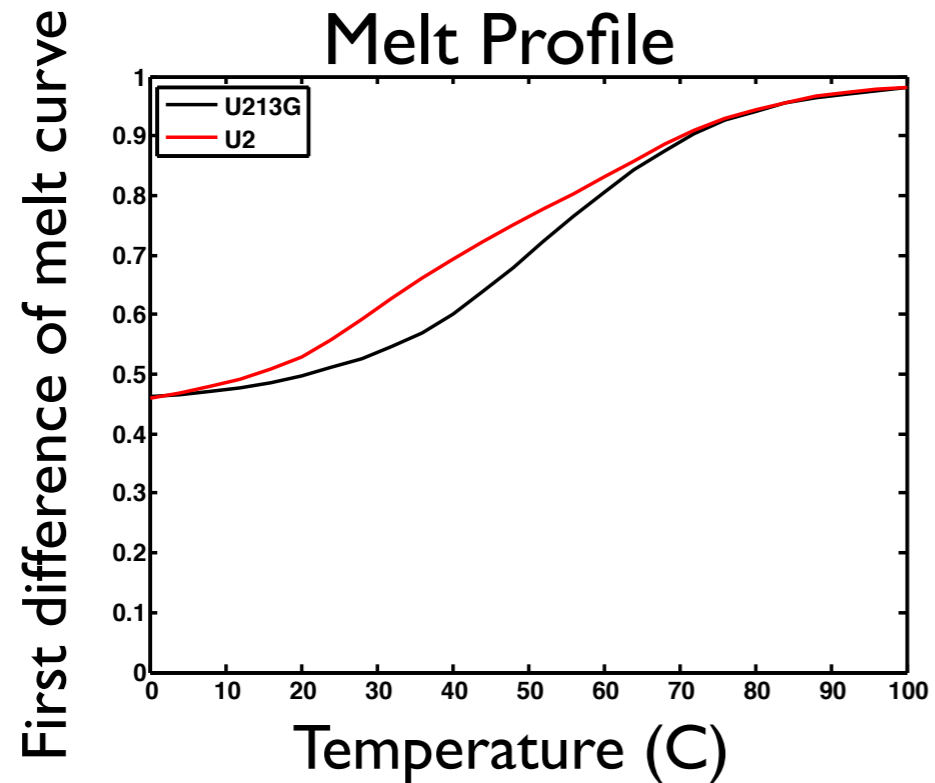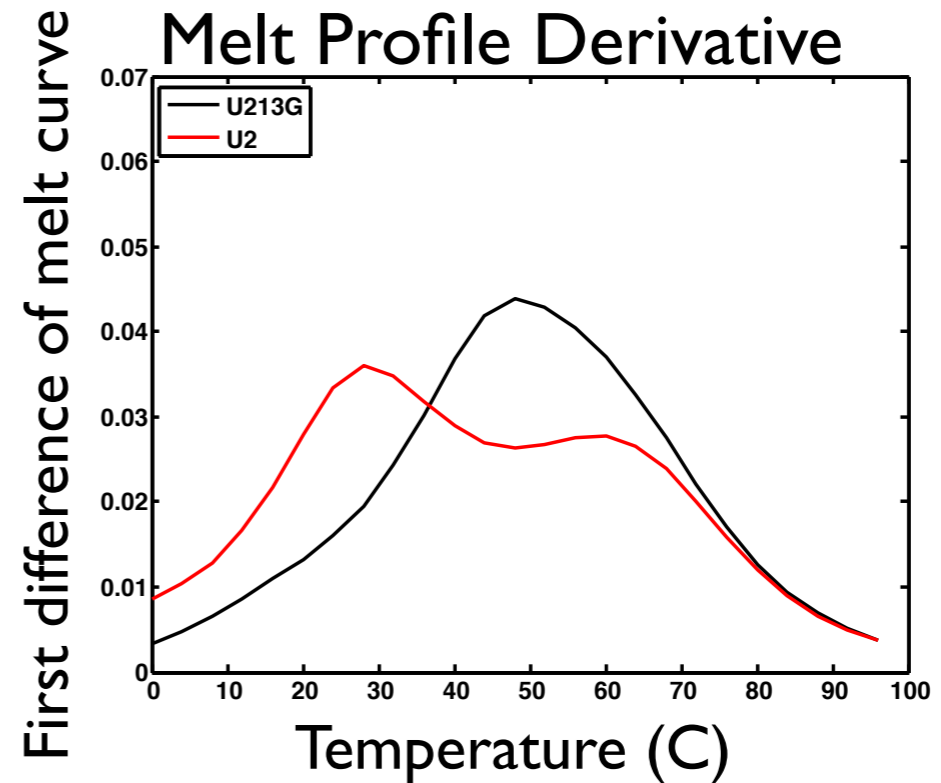

# U2150

Different - shifted

MFE structure at 0.0 C

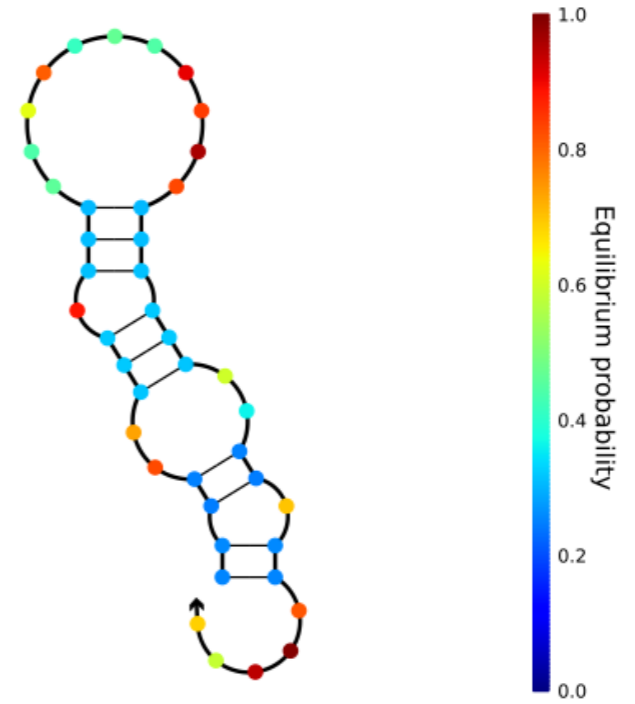

Free energy of secondary structure: -14.47 kcal/mol

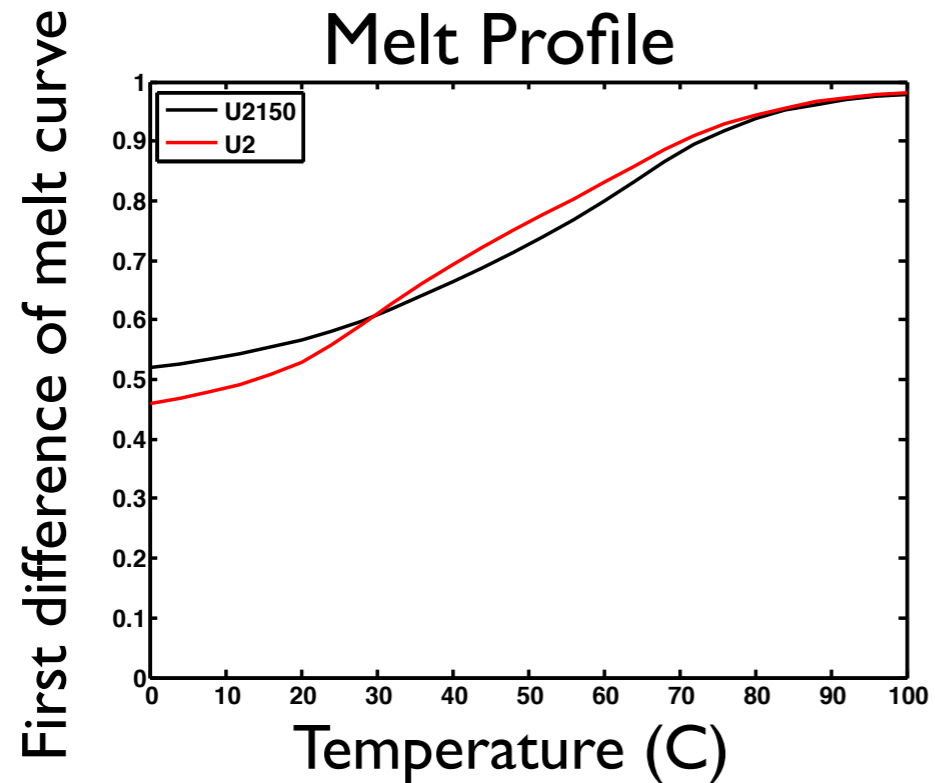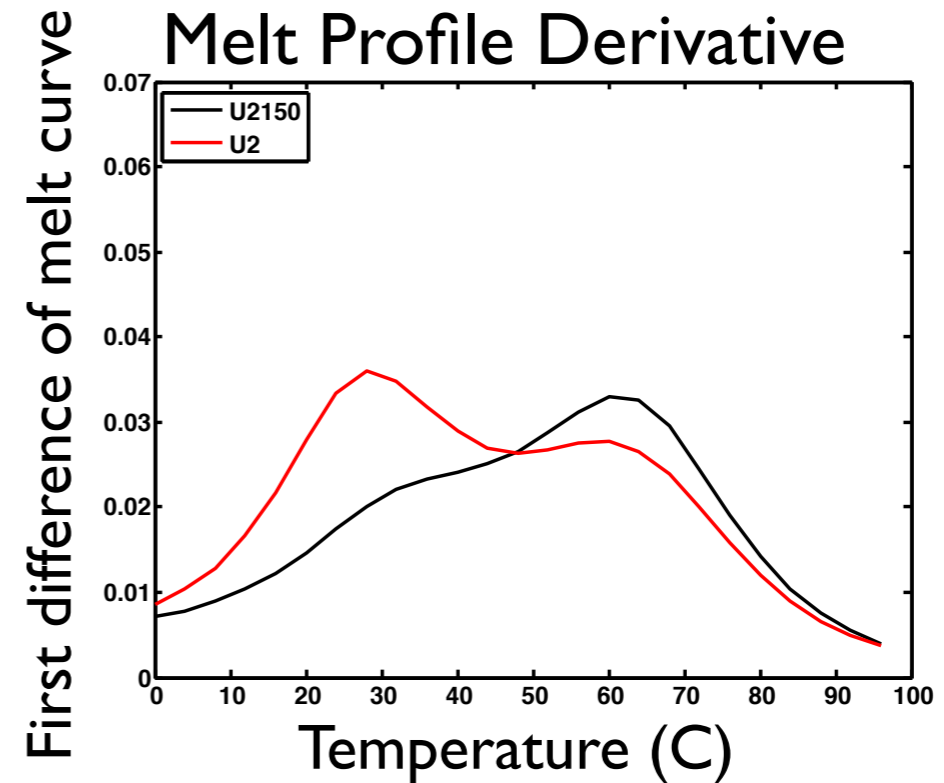



# U215A

Same

MFE structure at 0.0 C

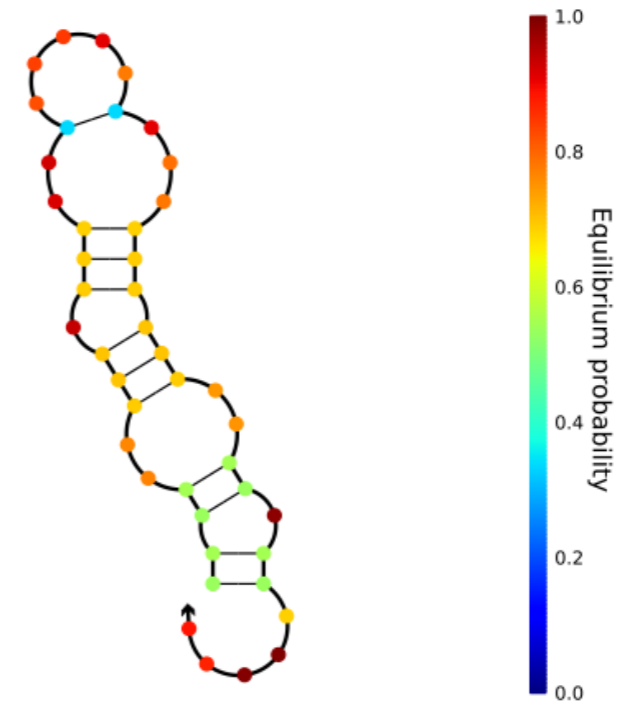

Free energy of secondary structure: -14.60 kcal/mol

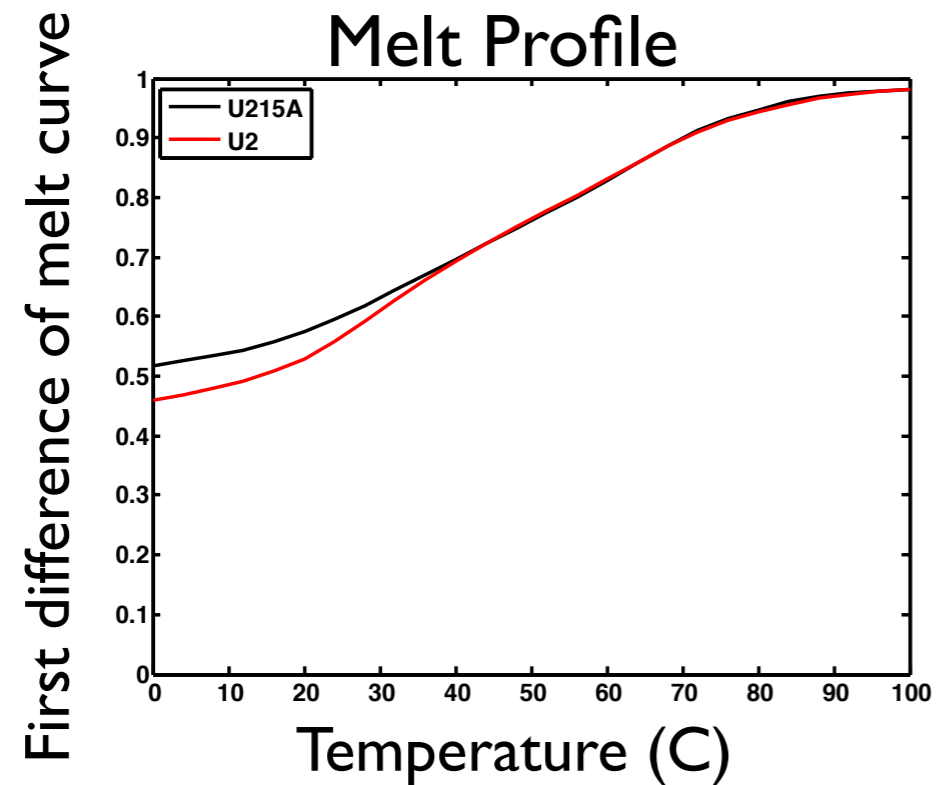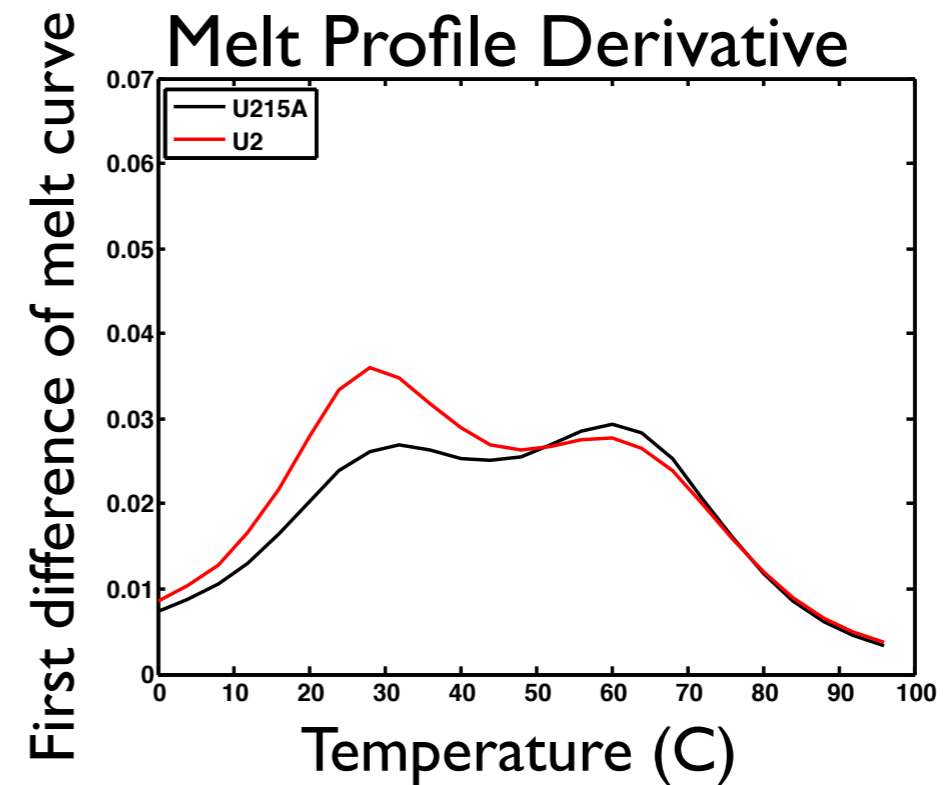

# U215G

Different - shifted

MFE structure at 0.0 C

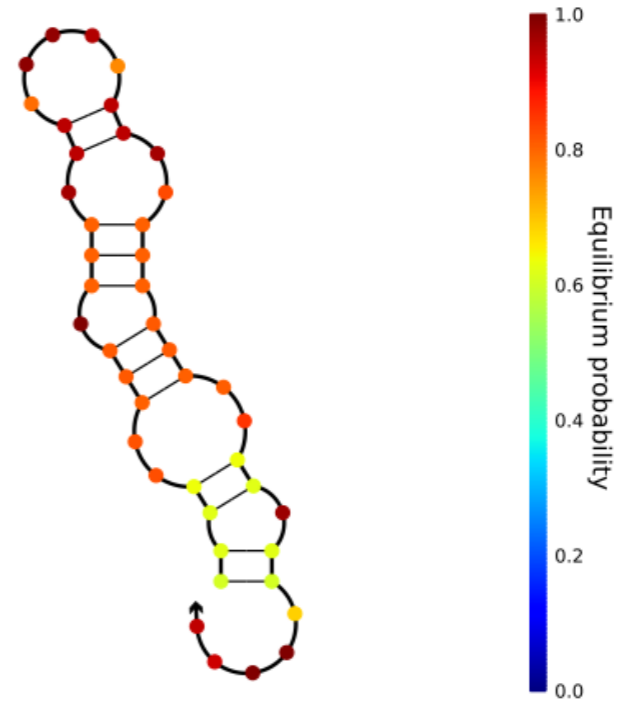

Free energy of secondary structure: -17.44 kcal/mol

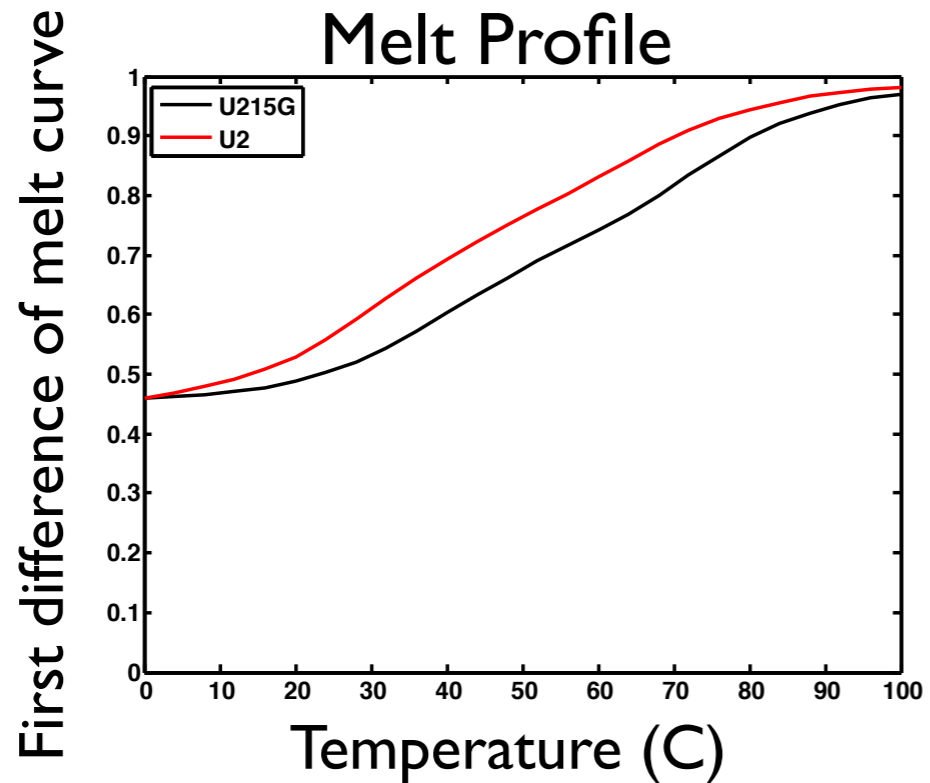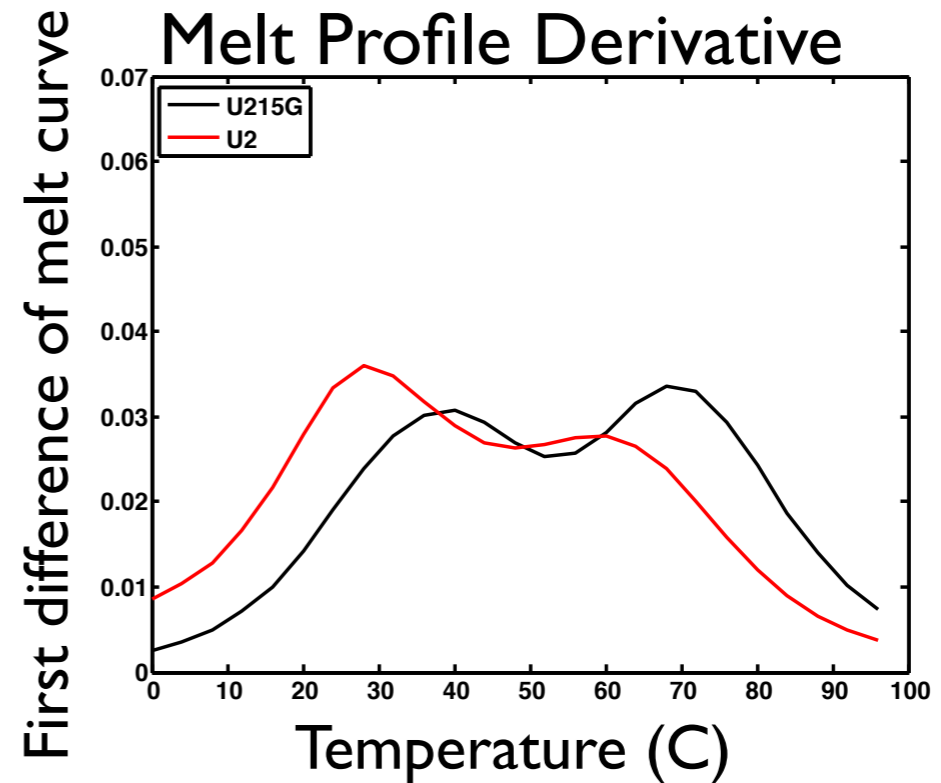

# U215U

Different

MFE structure at 0.0 C

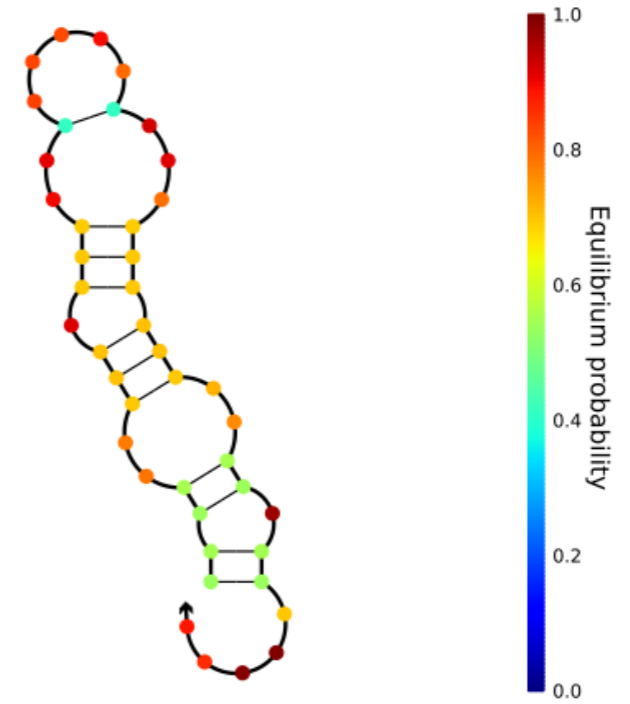

Free energy of secondary structure: -14.58 kcal/mol

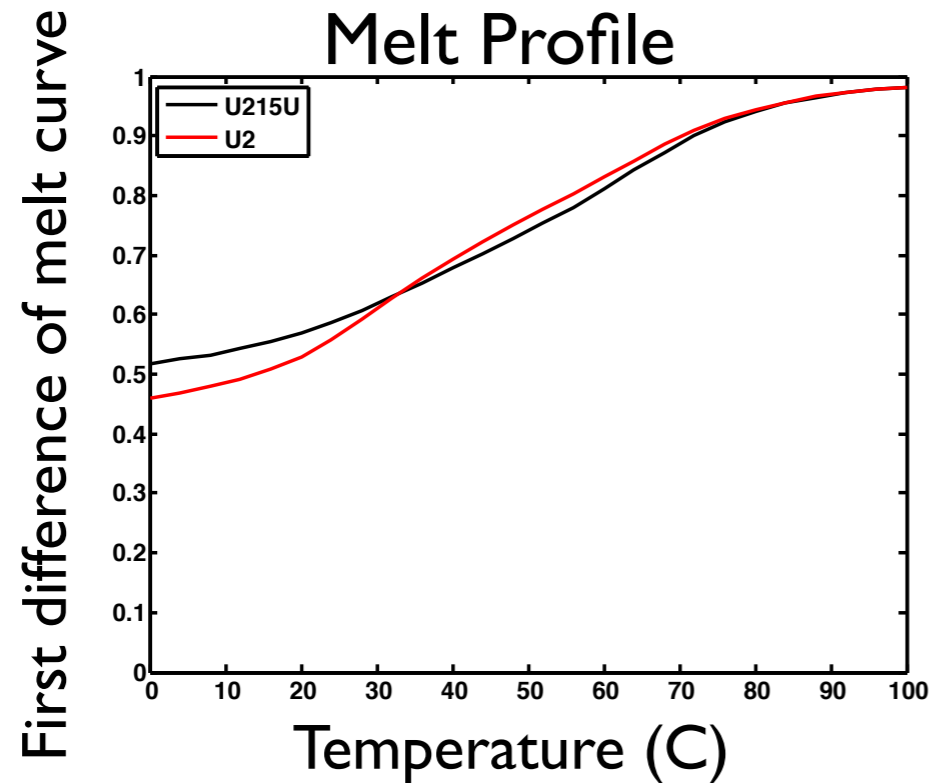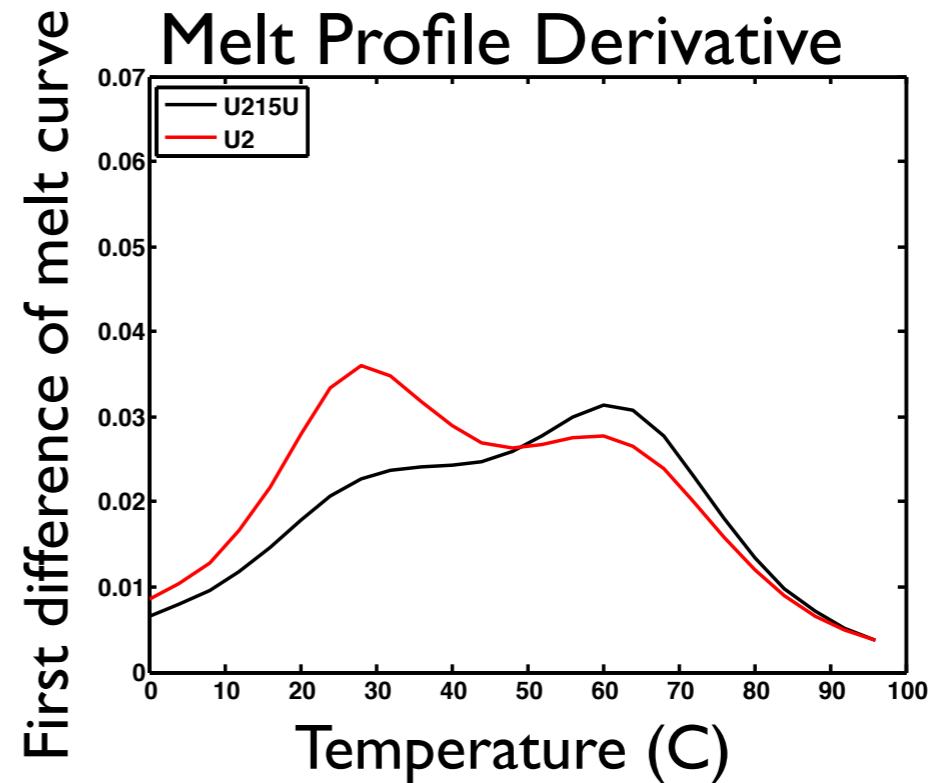

# U2160

Same

MFE structure at 0.0 C

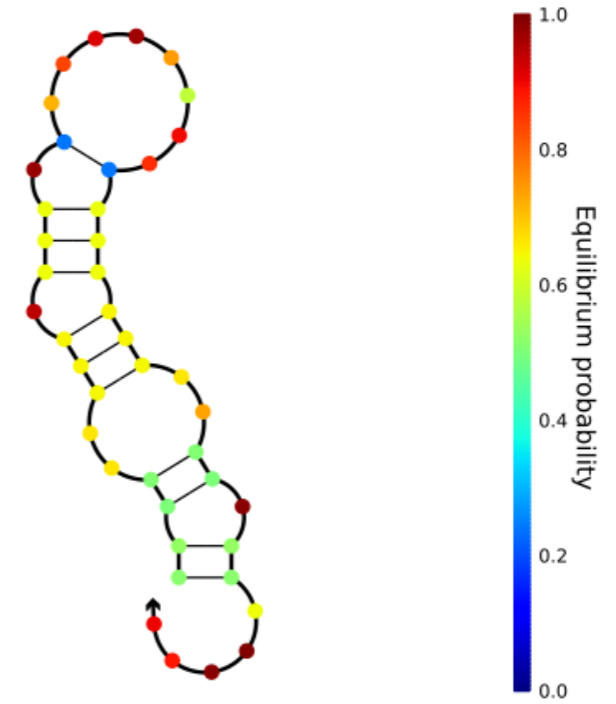

Free energy of secondary structure: -14.73 kcal/mol

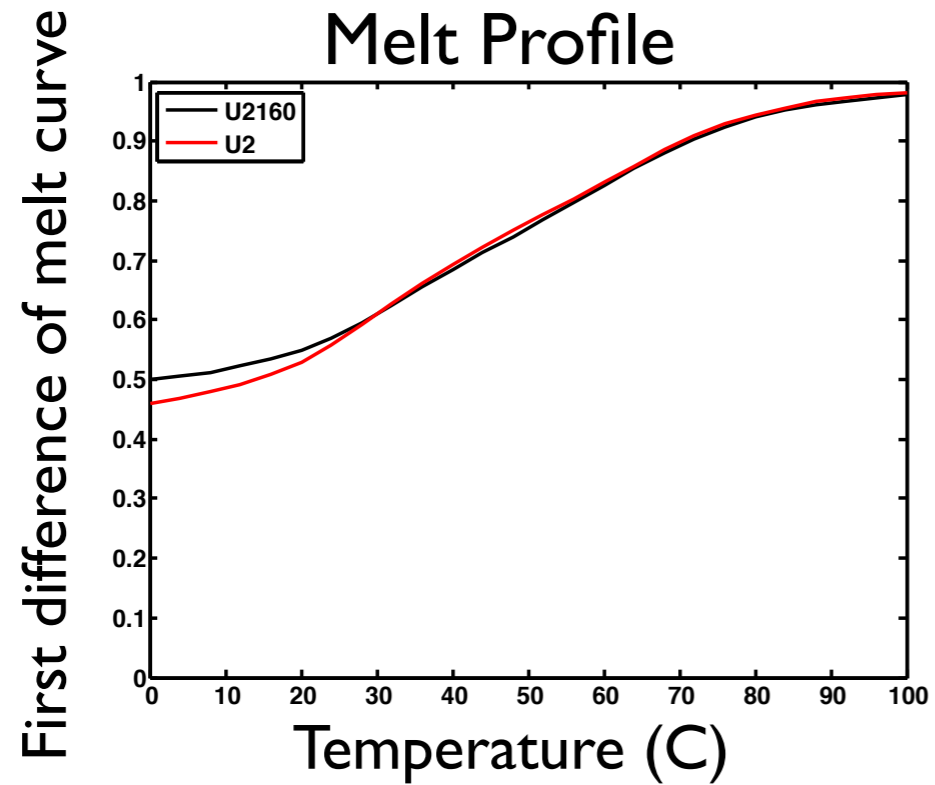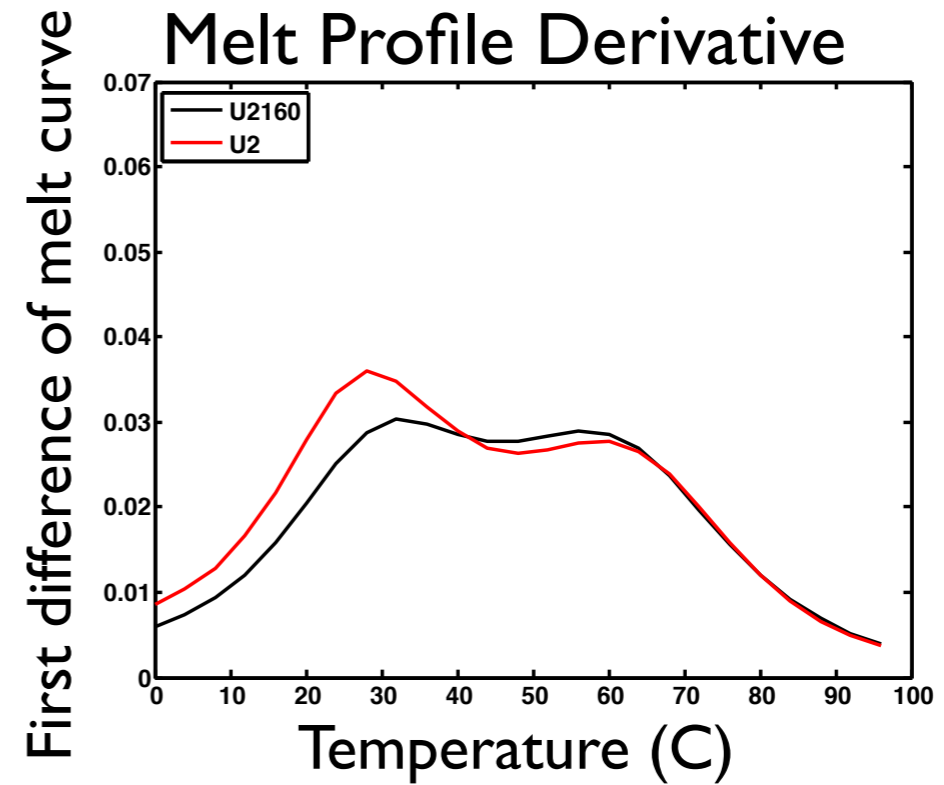

# U216A

Same

MFE structure at 0.0 C

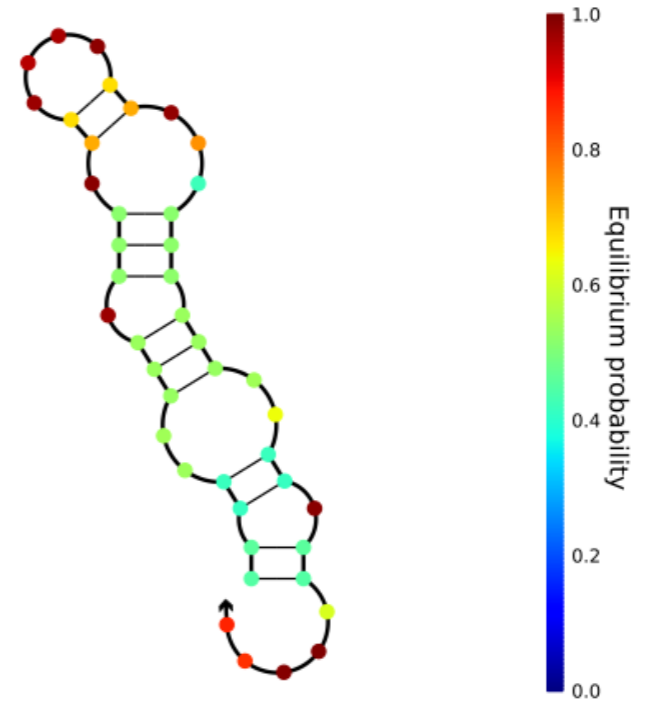

Free energy of secondary structure: -15.15 kcal/mol

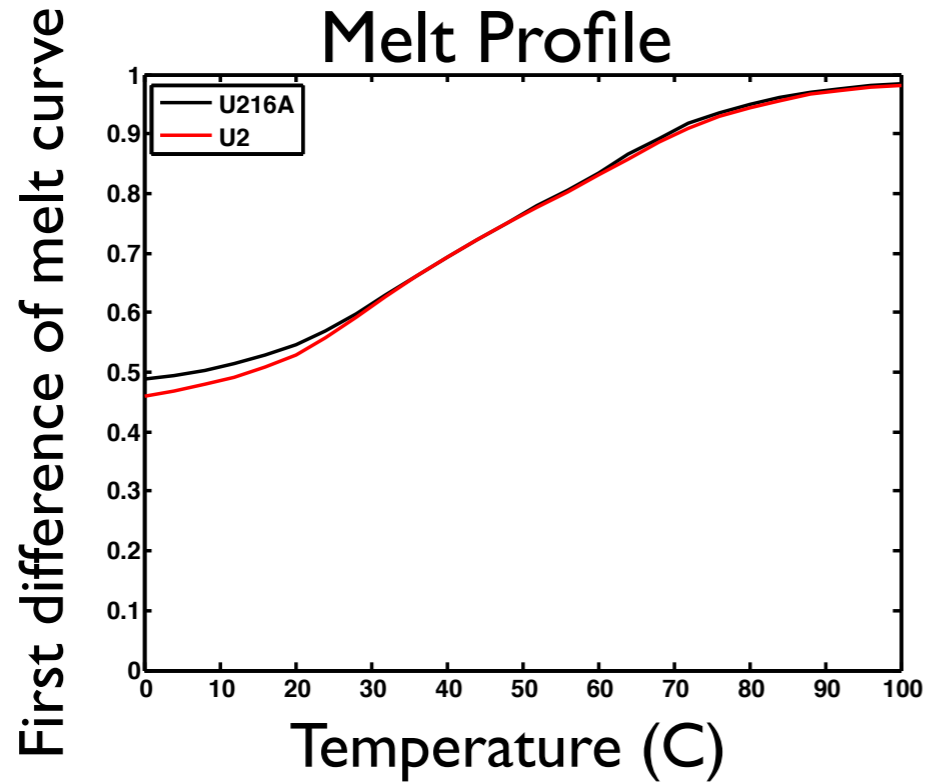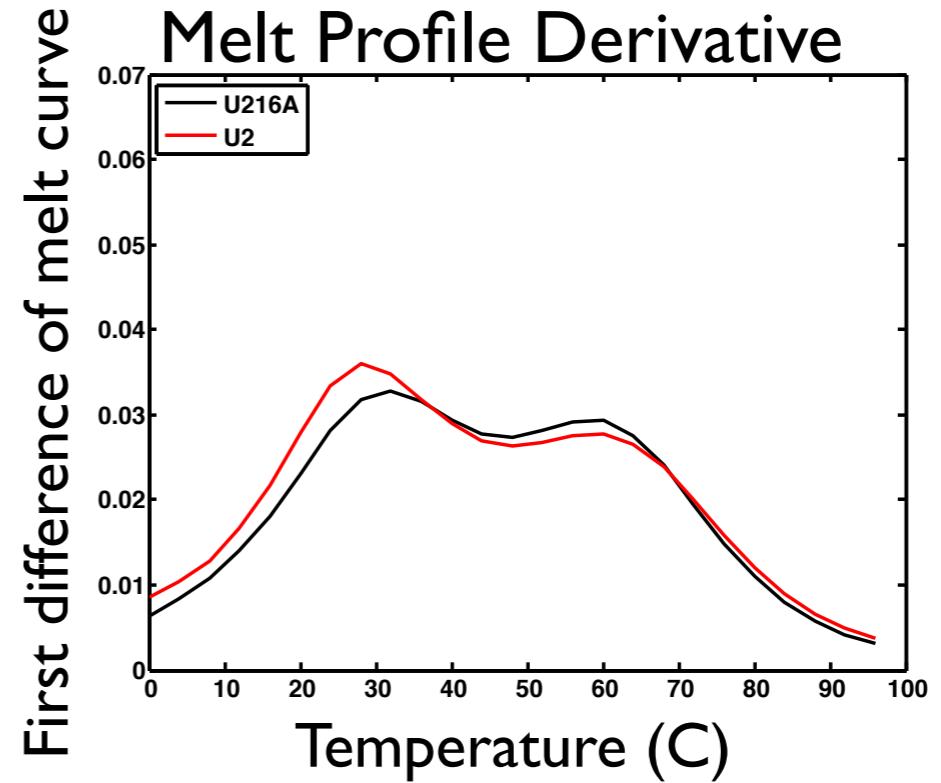

# U216C

Same

MFE structure at 0.0 C

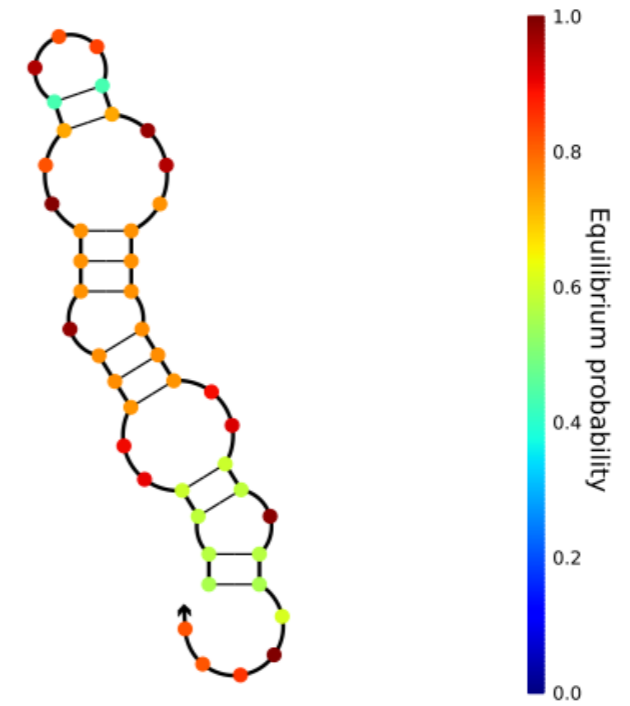

Free energy of secondary structure: -15.56 kcal/mol

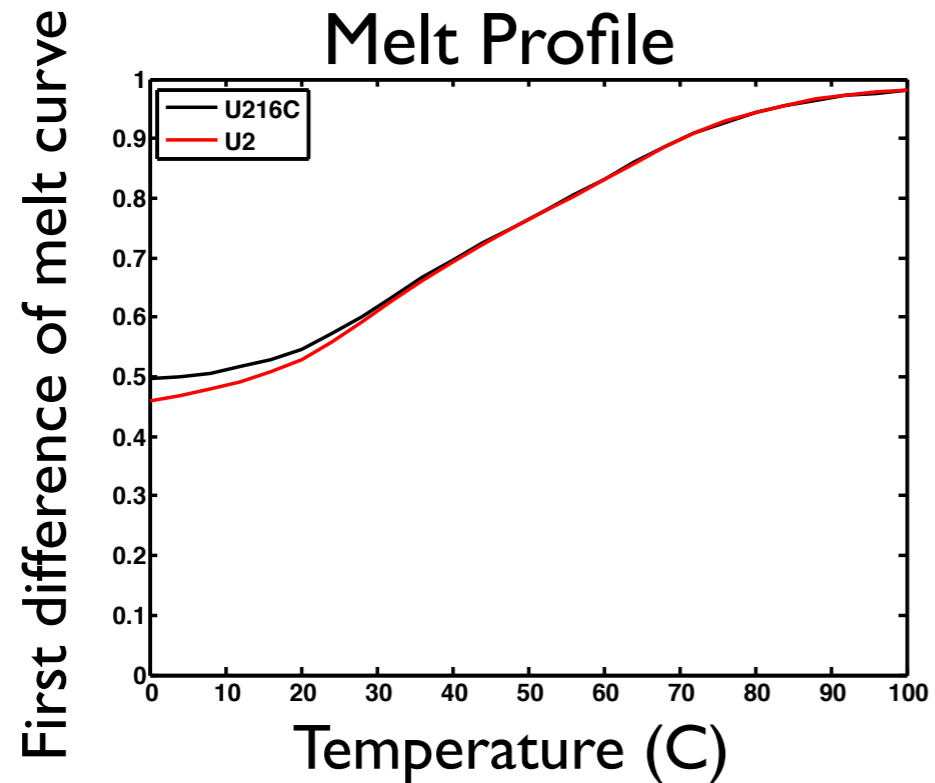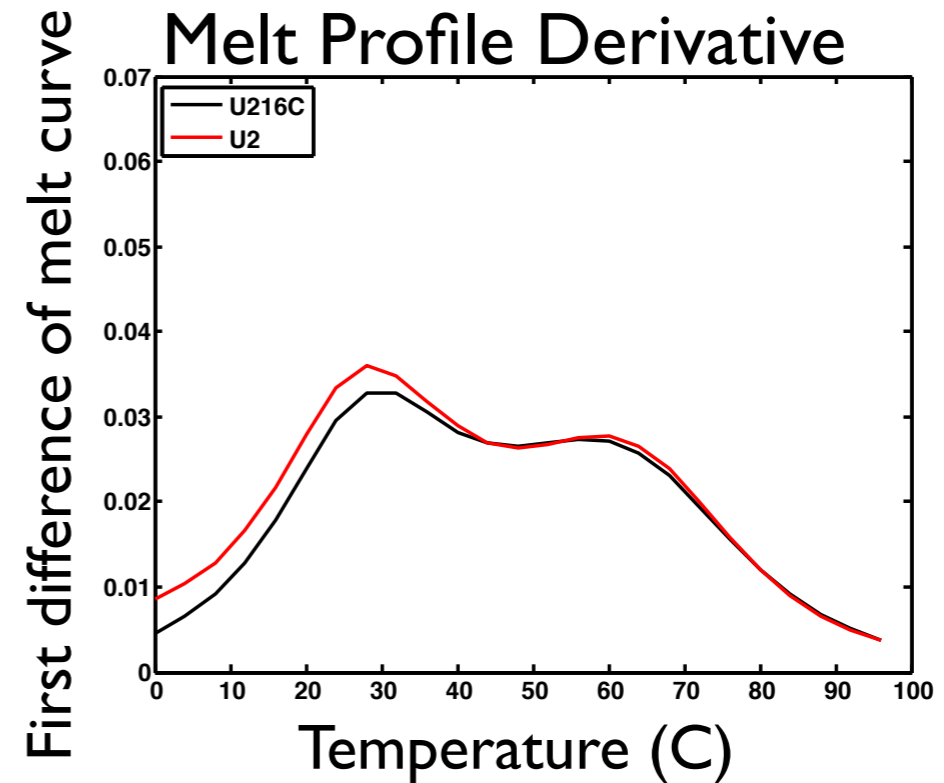

# U216G

Same

MFE structure at 0.0 C

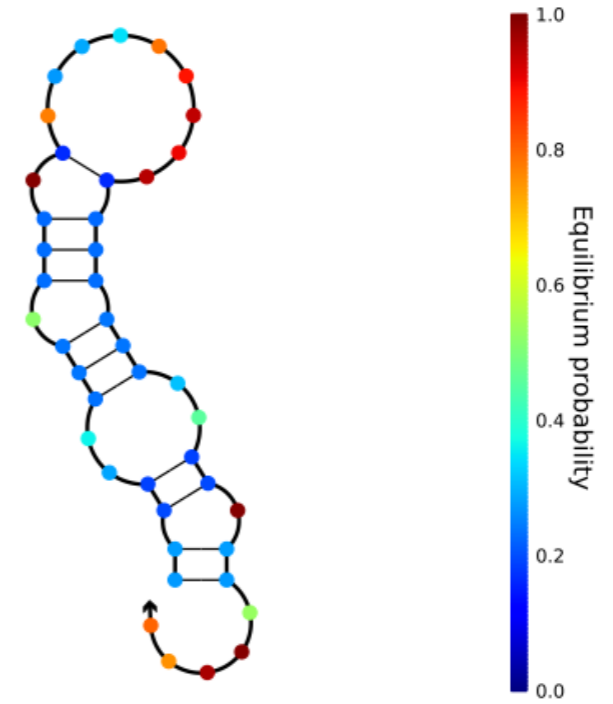

Free energy of secondary structure: -15.15 kcal/mol

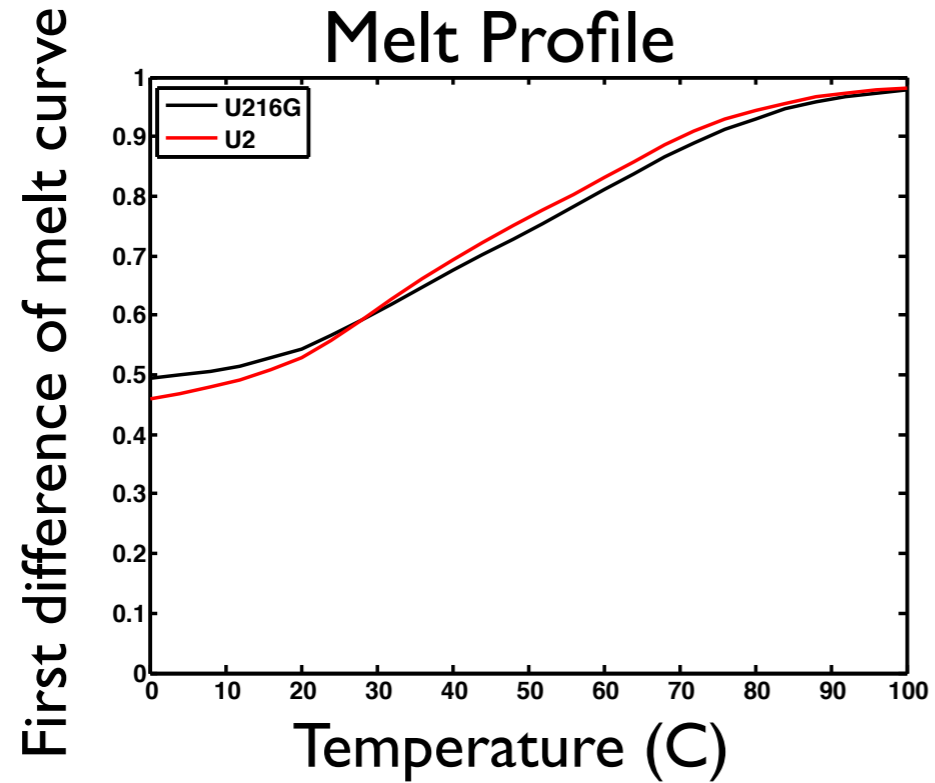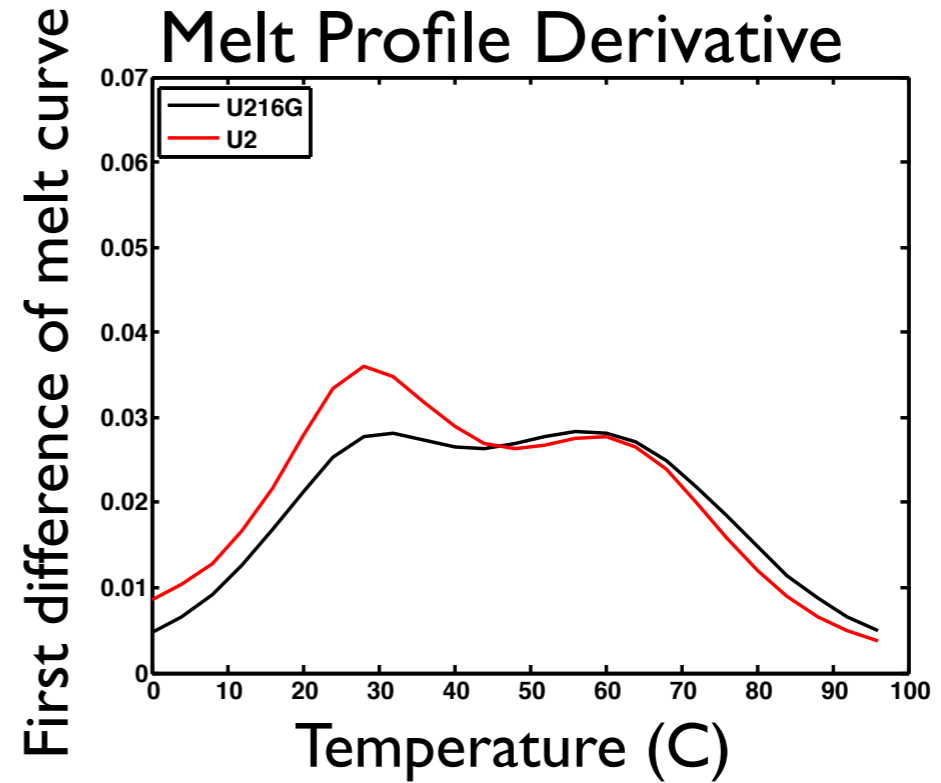

# U2240

Same

MFE structure at 0.0 C

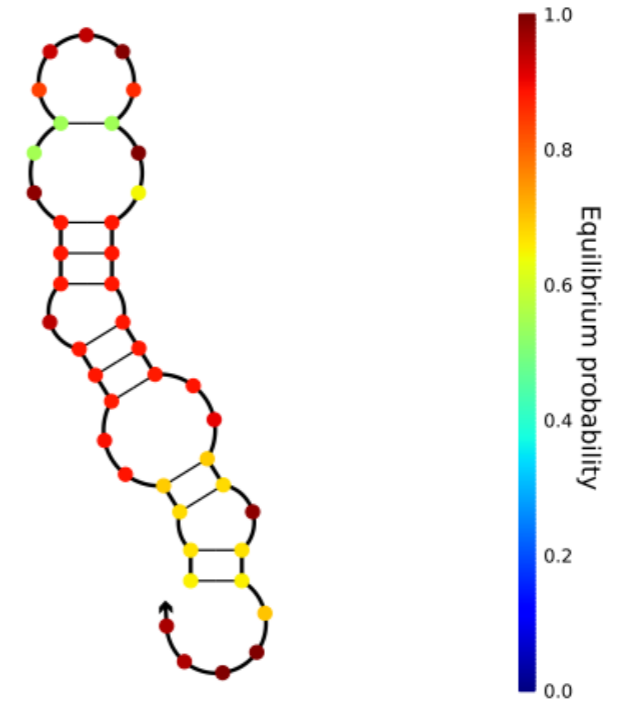

Free energy of secondary structure: -15.19 kcal/mol

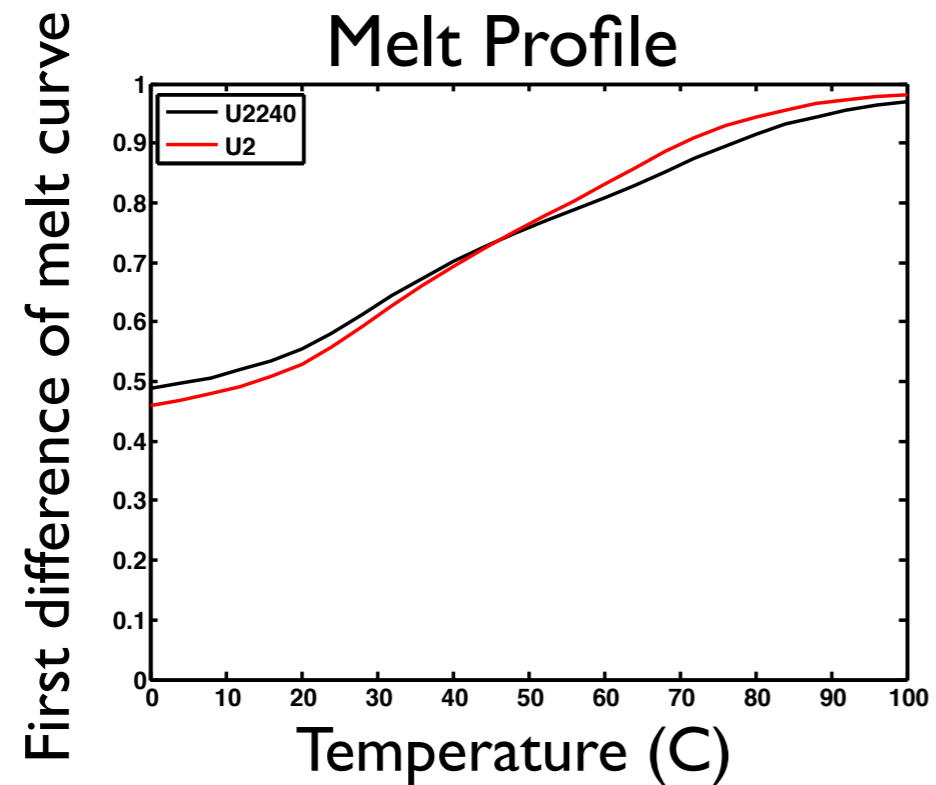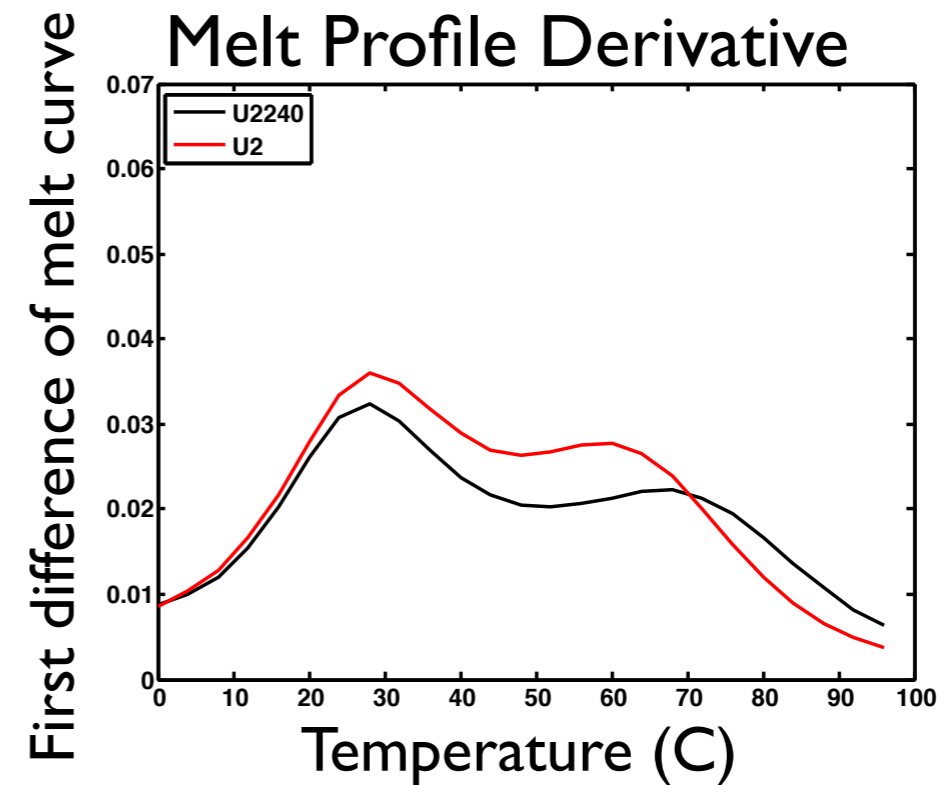



# U224C

Same

MFE structure at 0.0 C

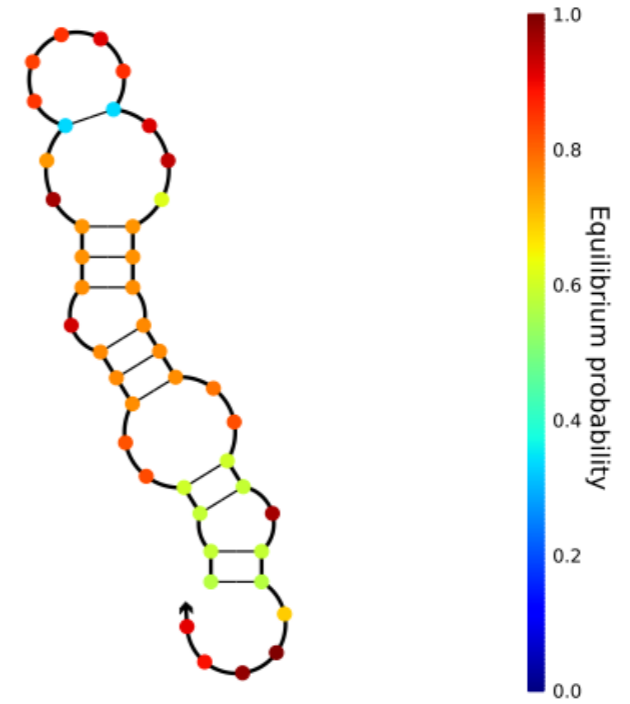

Free energy of secondary structure: -14.58 kcal/mol

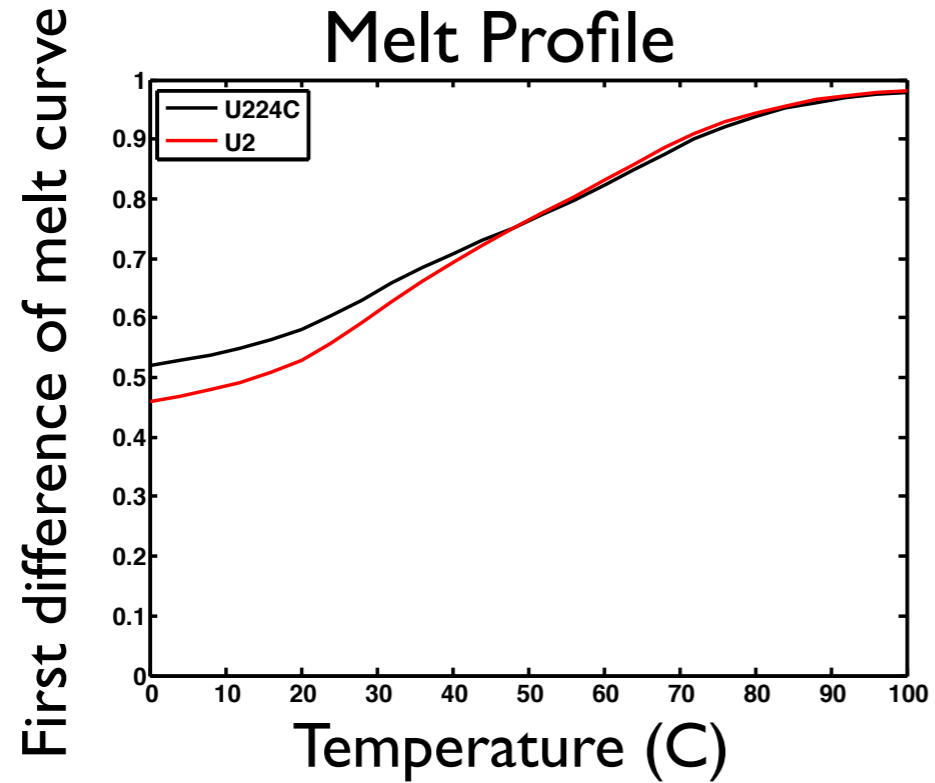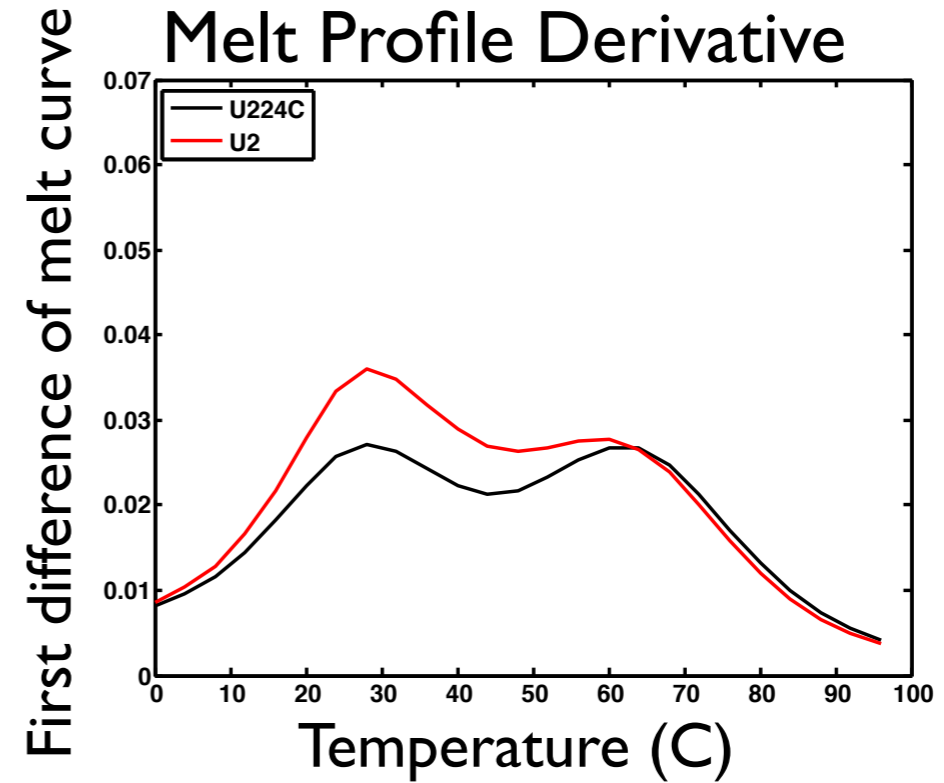

# U224G

Different - shifted

MFE structure at 0.0 C

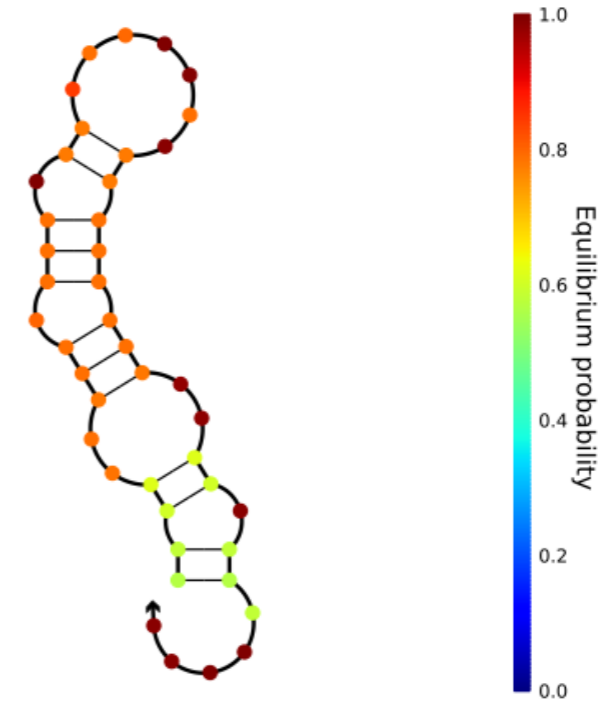

Free energy of secondary structure: -17.72 kcal/mol

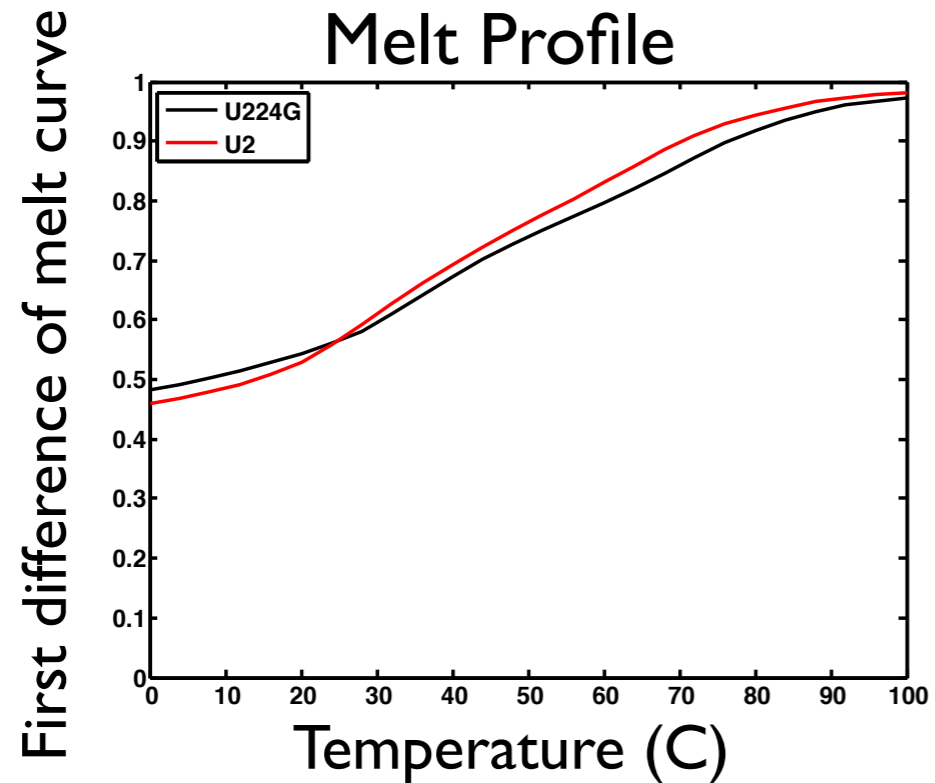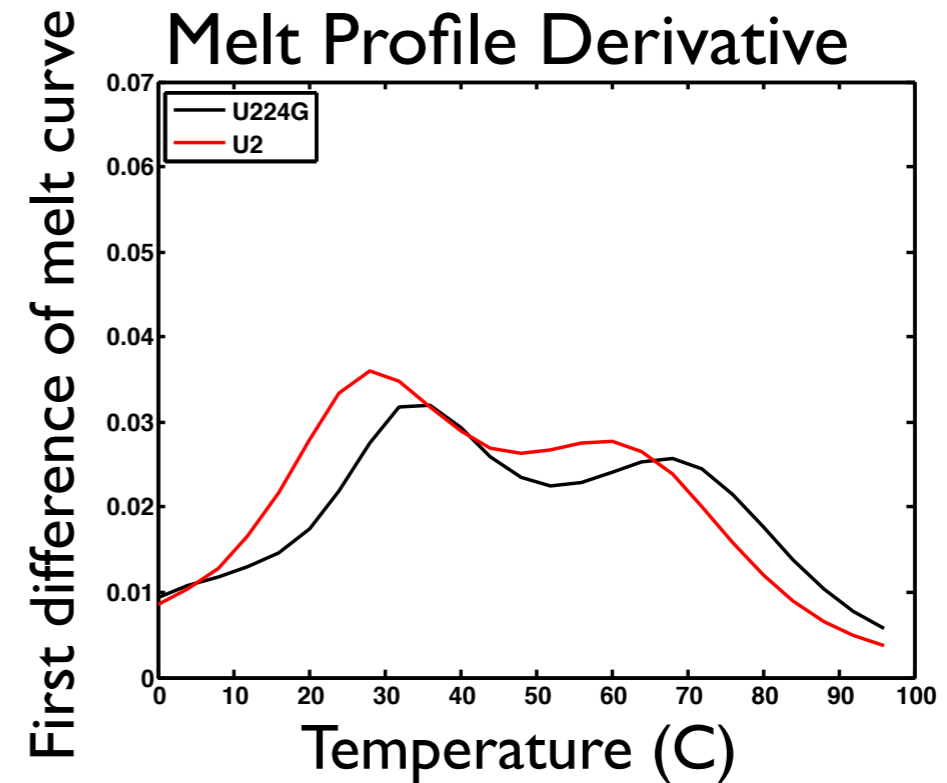

# U224U

Different - Threshold

MFE structure at 0.0 C

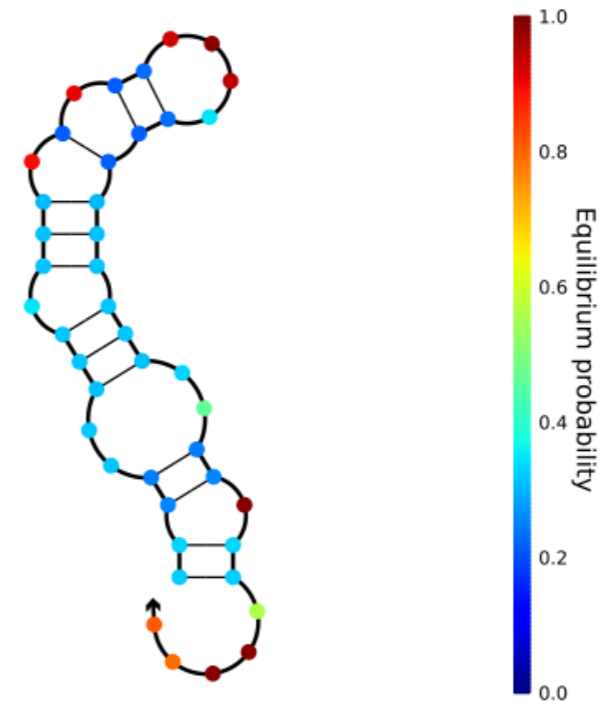

Free energy of secondary structure: -15.55 kcal/mol

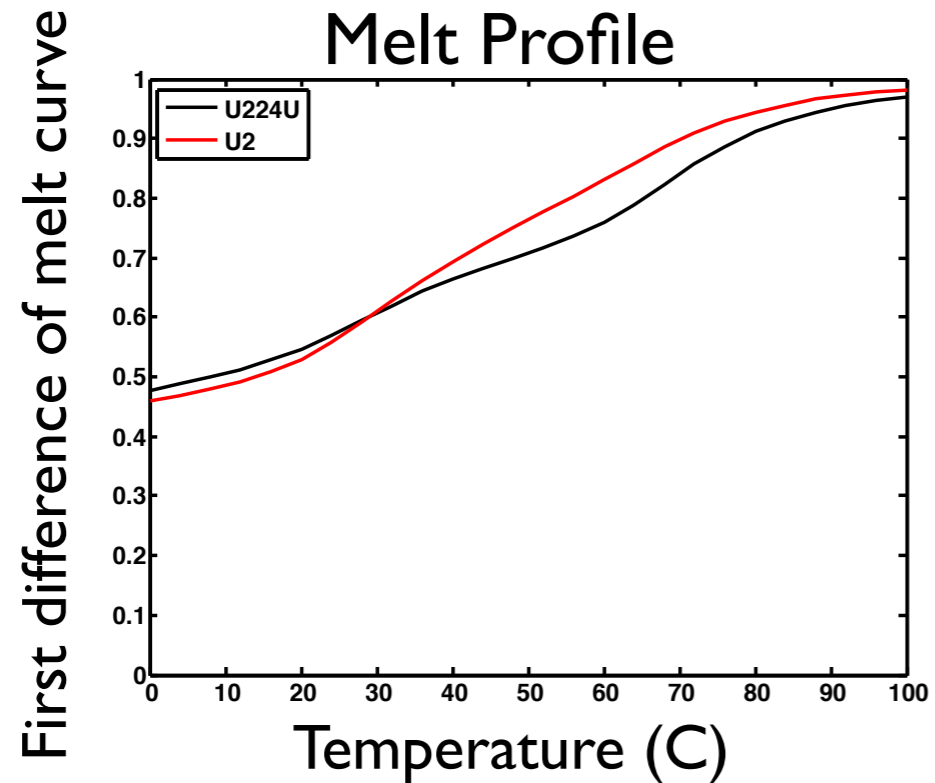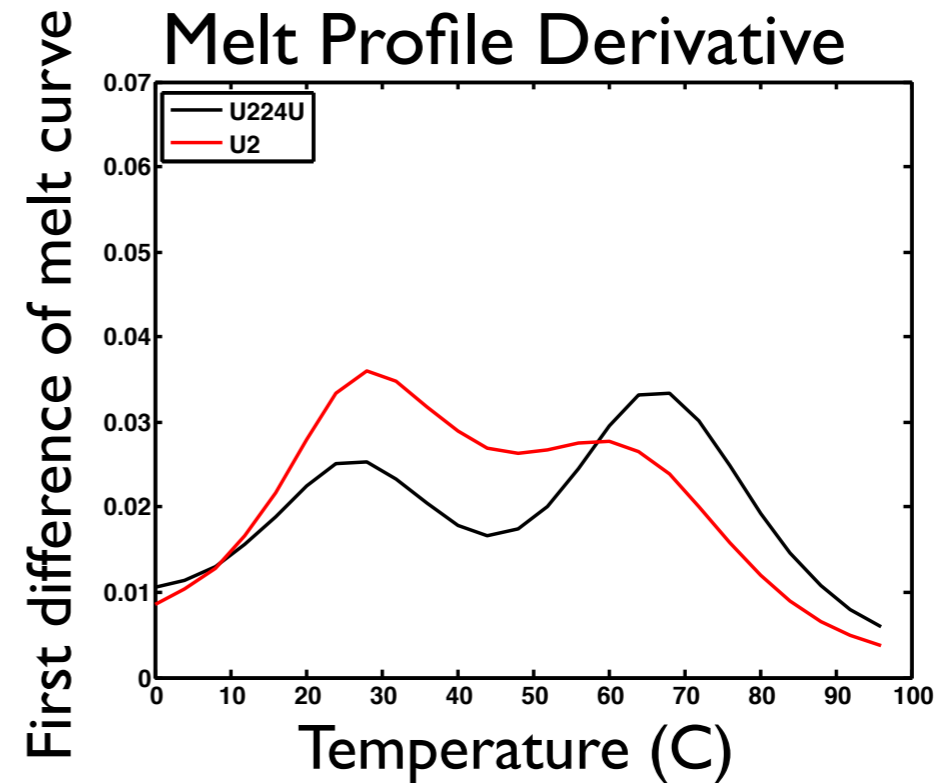

# U2250

Different - Threshold

MFE structure at 0.0 C

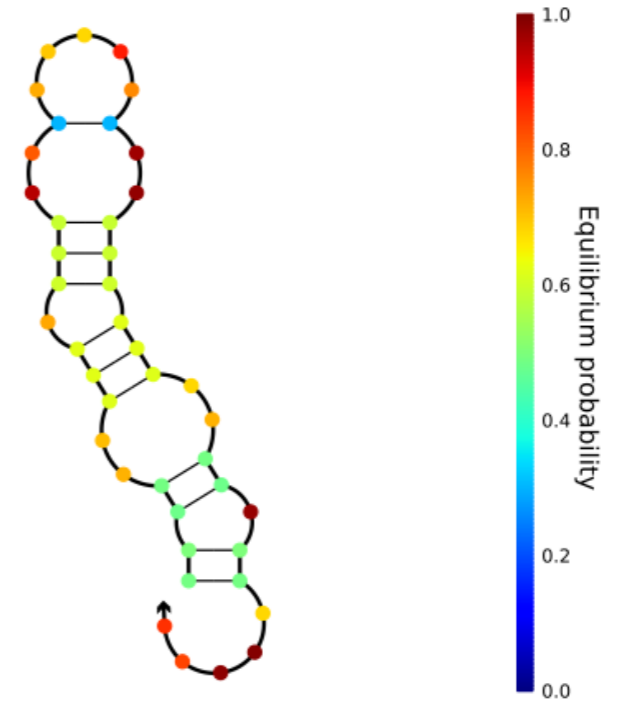

Free energy of secondary structure: -13.55 kcal/mol

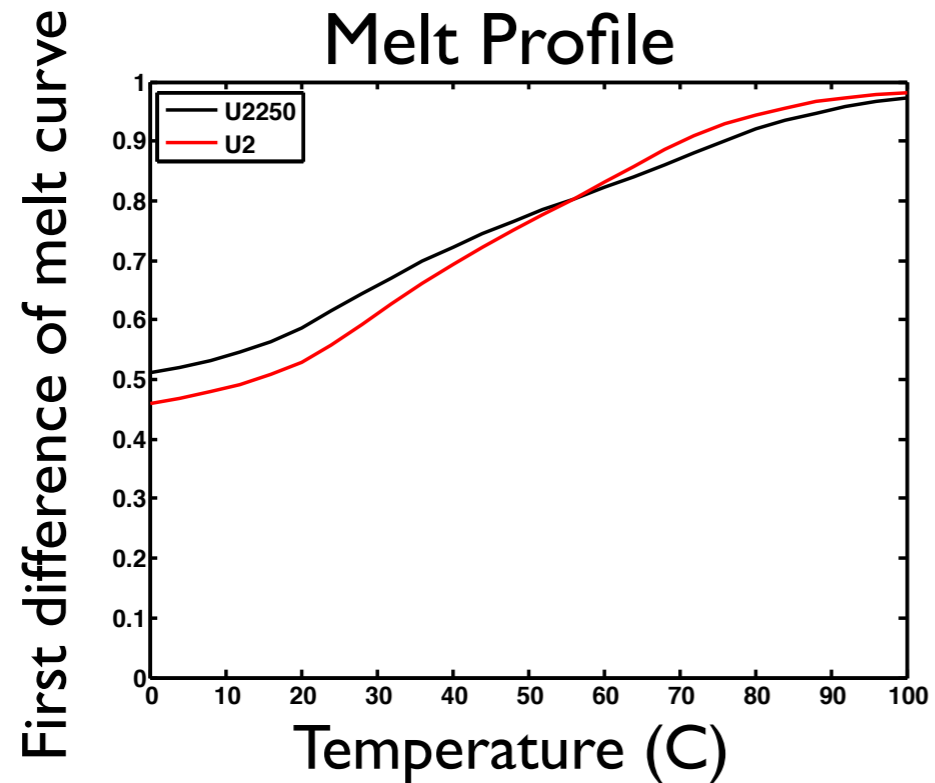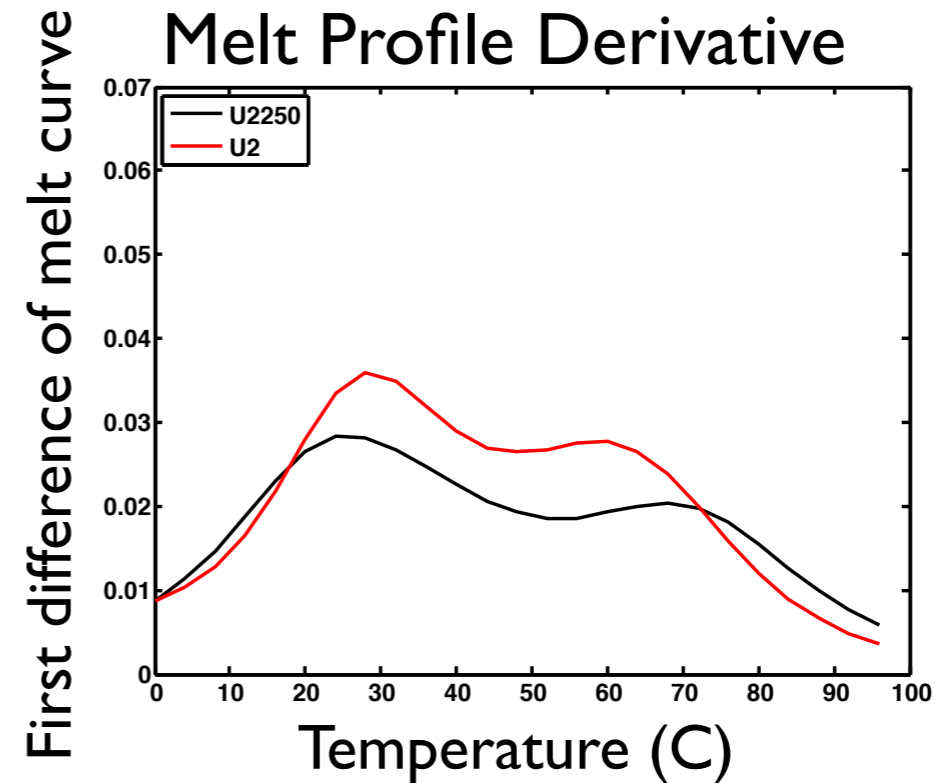

# U225A

Same

MFE structure at 0.0 C

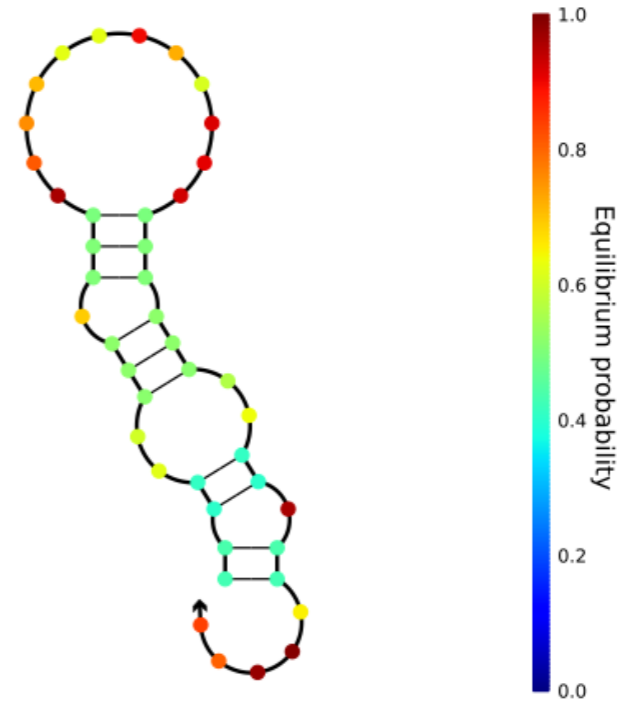

Free energy of secondary structure: -13.09 kcal/mol

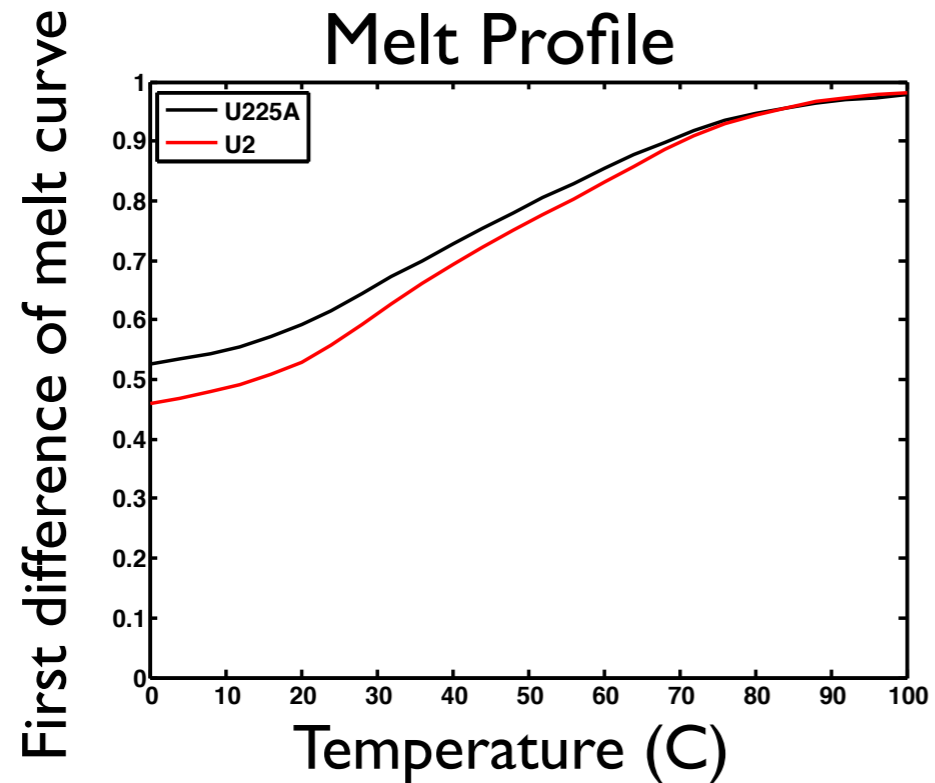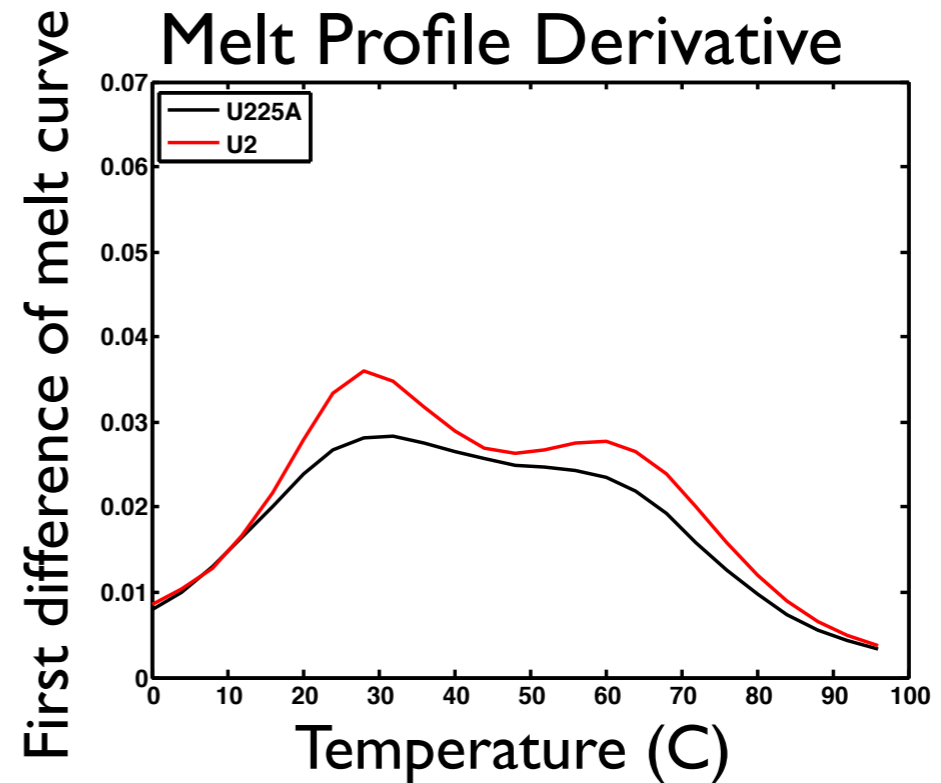

# U225C

Different

MFE structure at 0.0 C

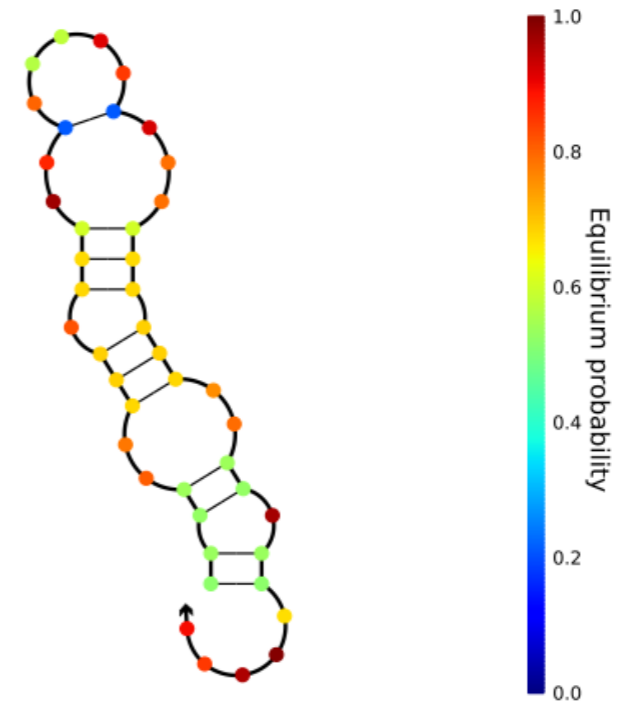

Free energy of secondary structure: -13.21 kcal/mol

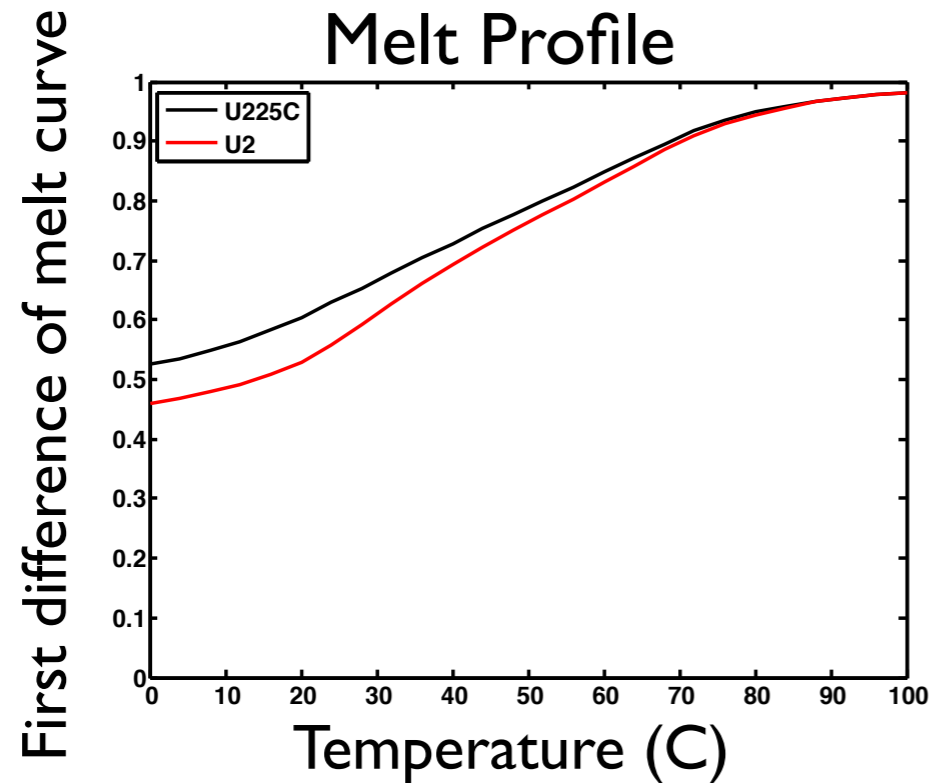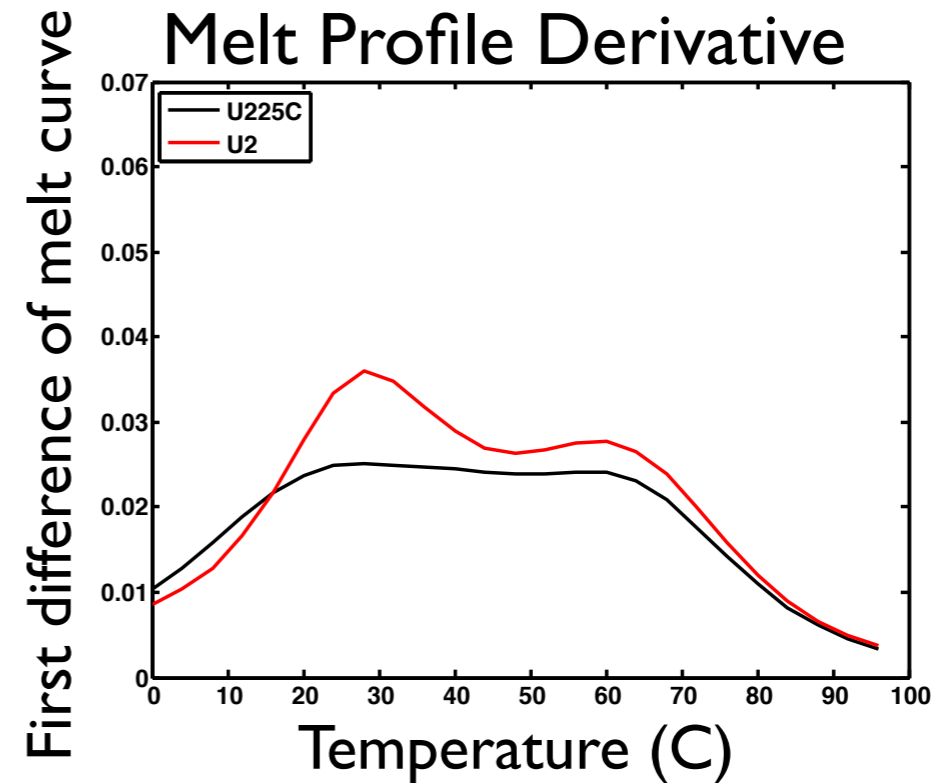

# U225U

Same

MFE structure at 0.0 C

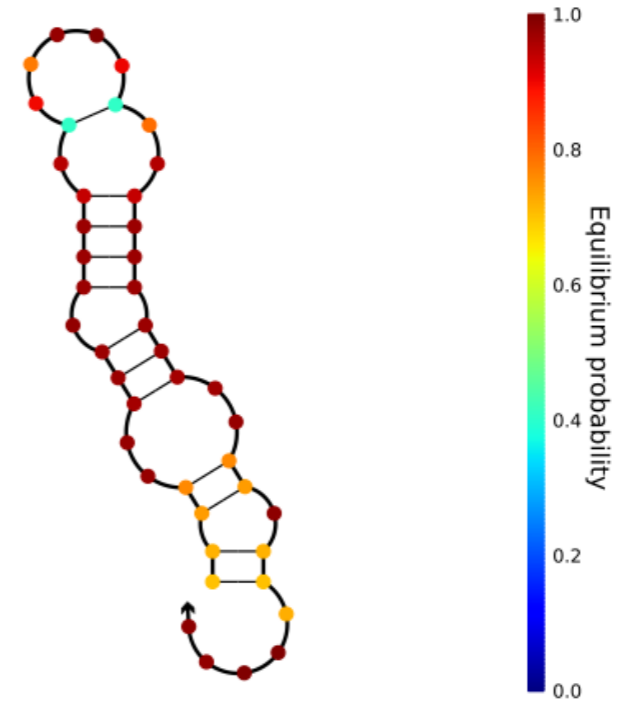

Free energy of secondary structure: -14.88 kcal/mol

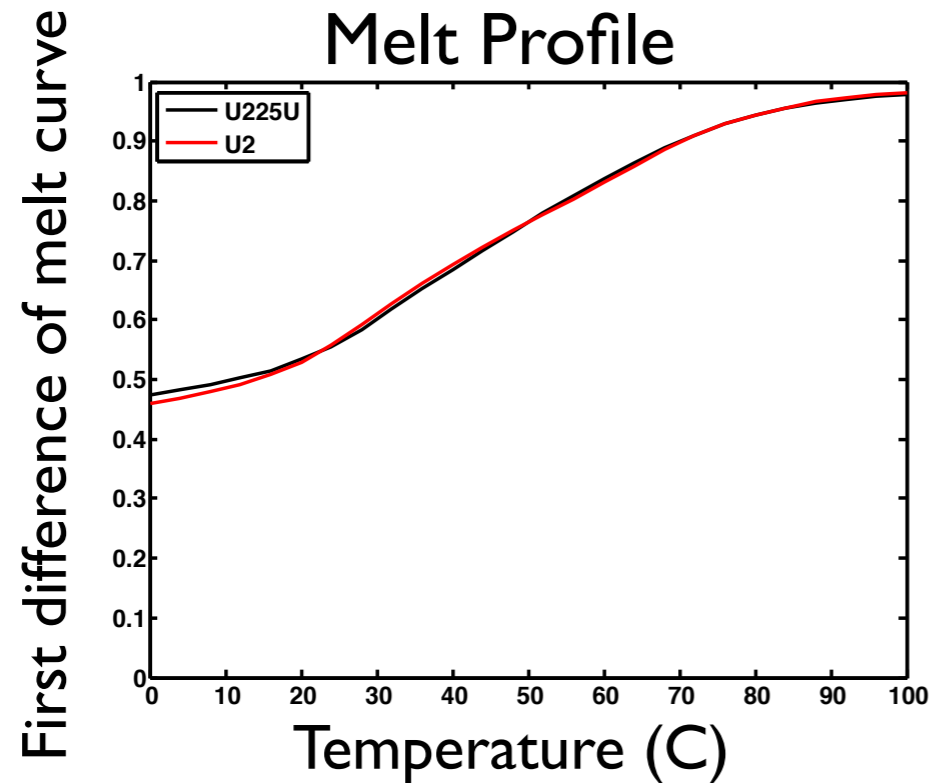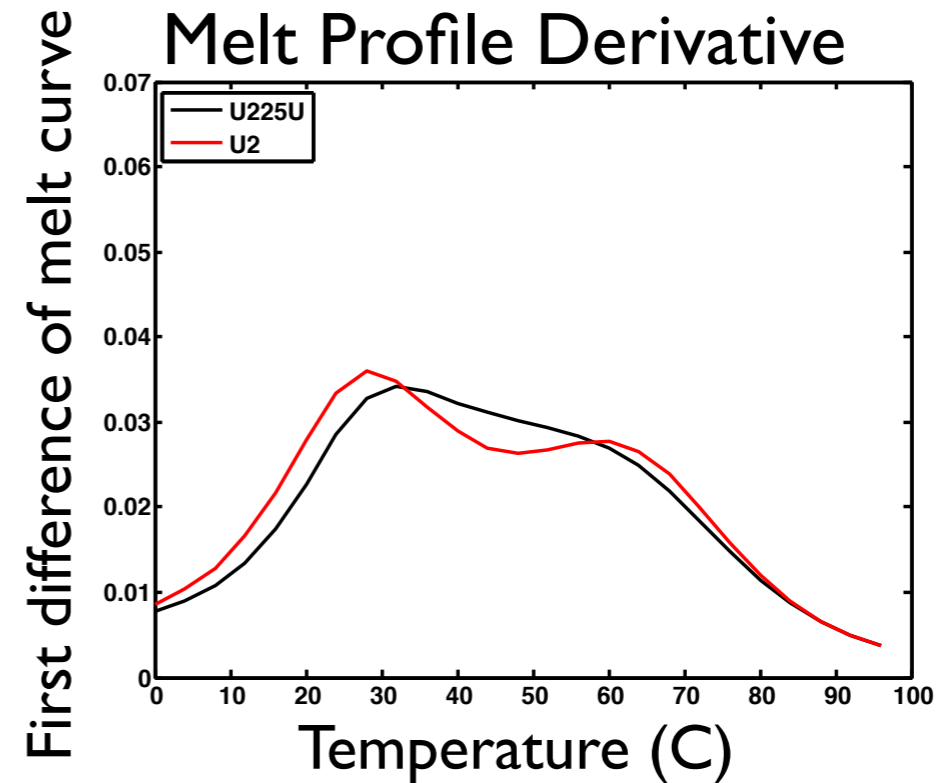

# U2340

Different - shifted

MFE structure at 0.0 C

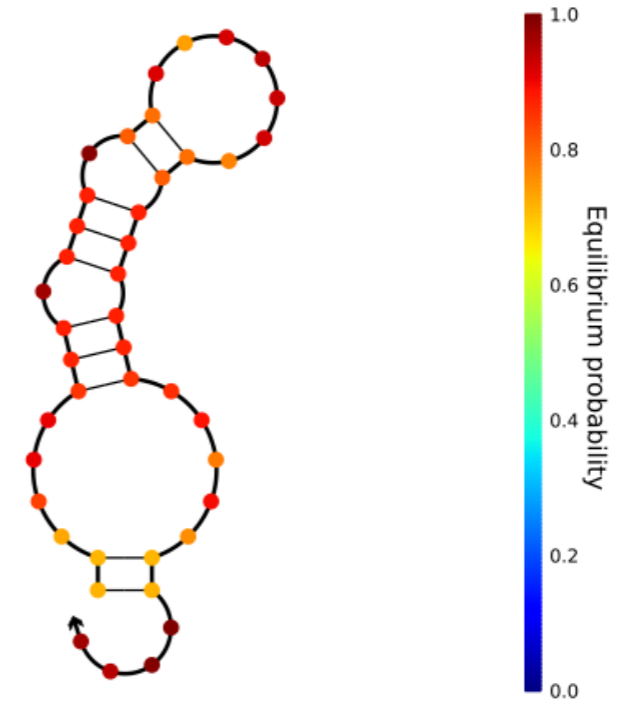

Free energy of secondary structure: -15.89 kcal/mol

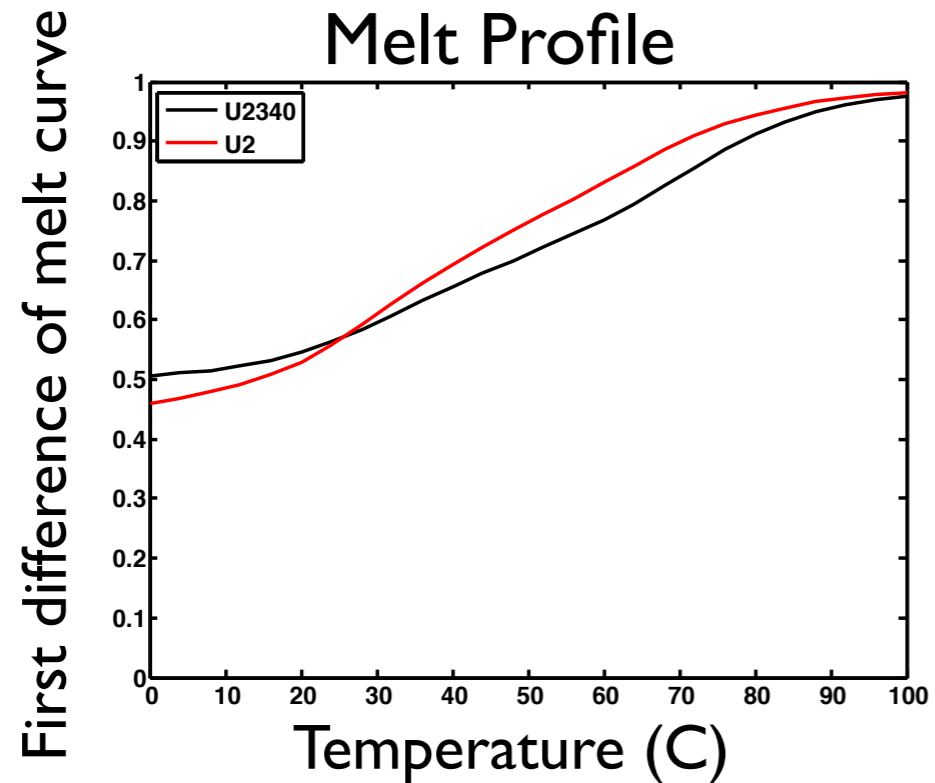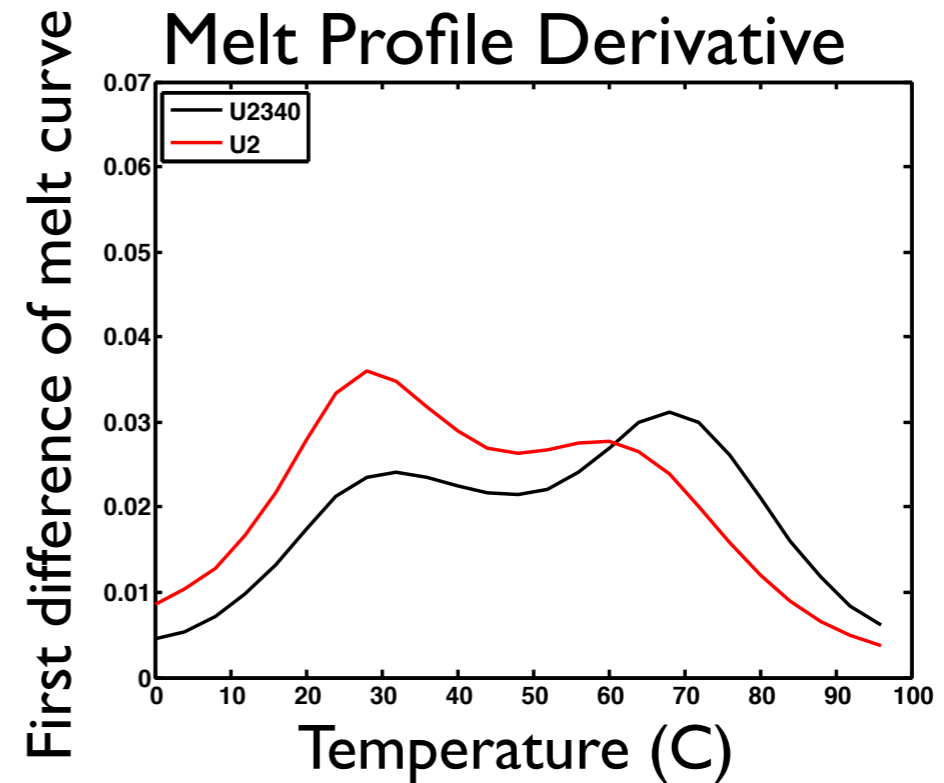



# U234C

Different - Threshold, shifted

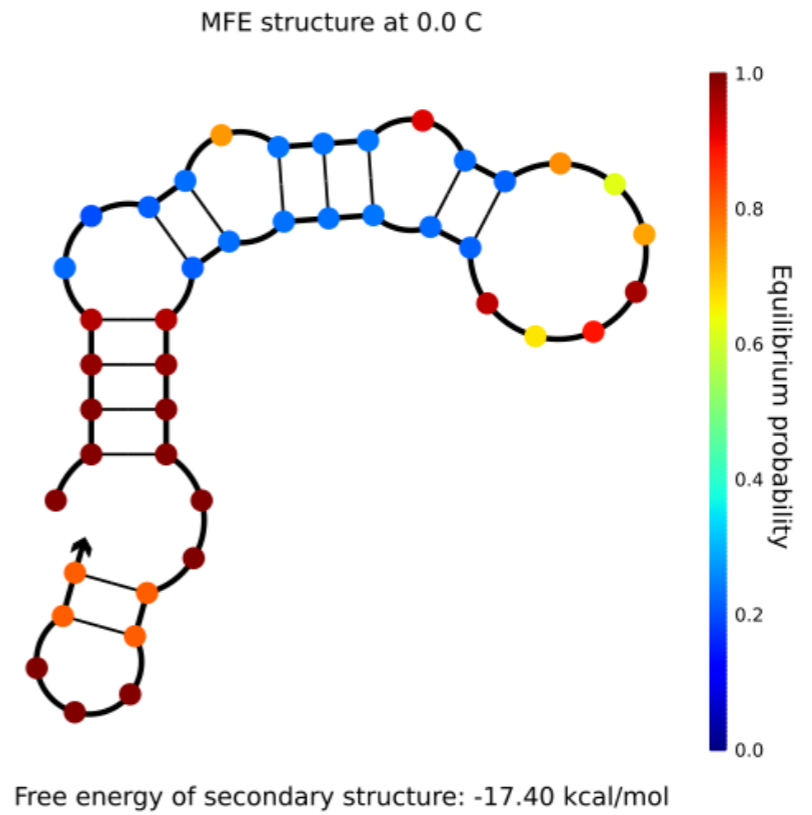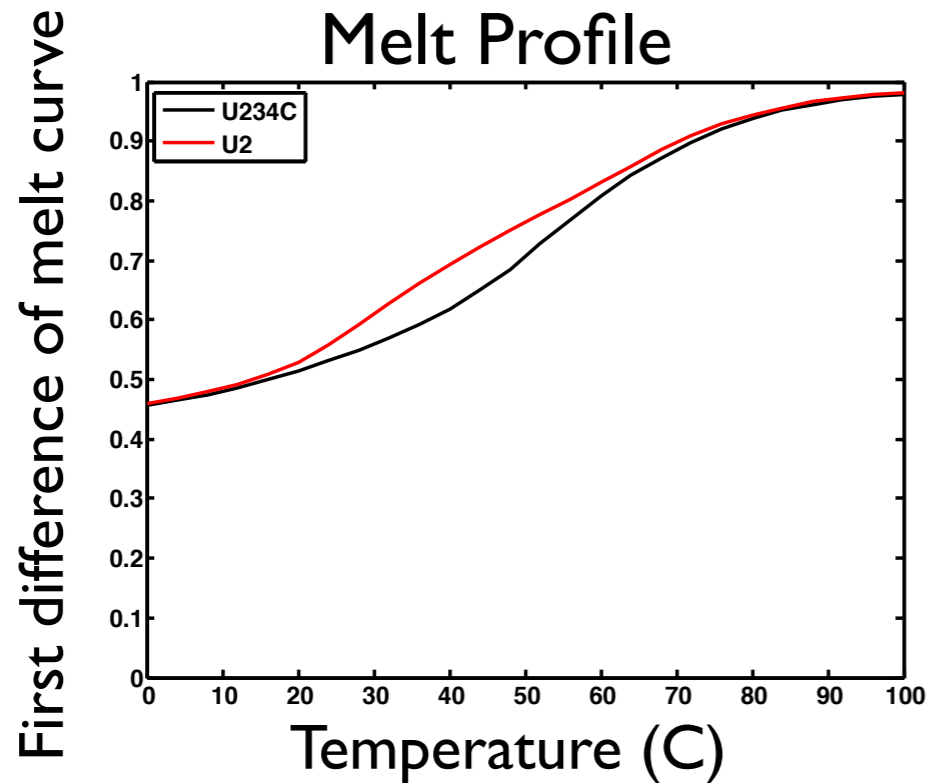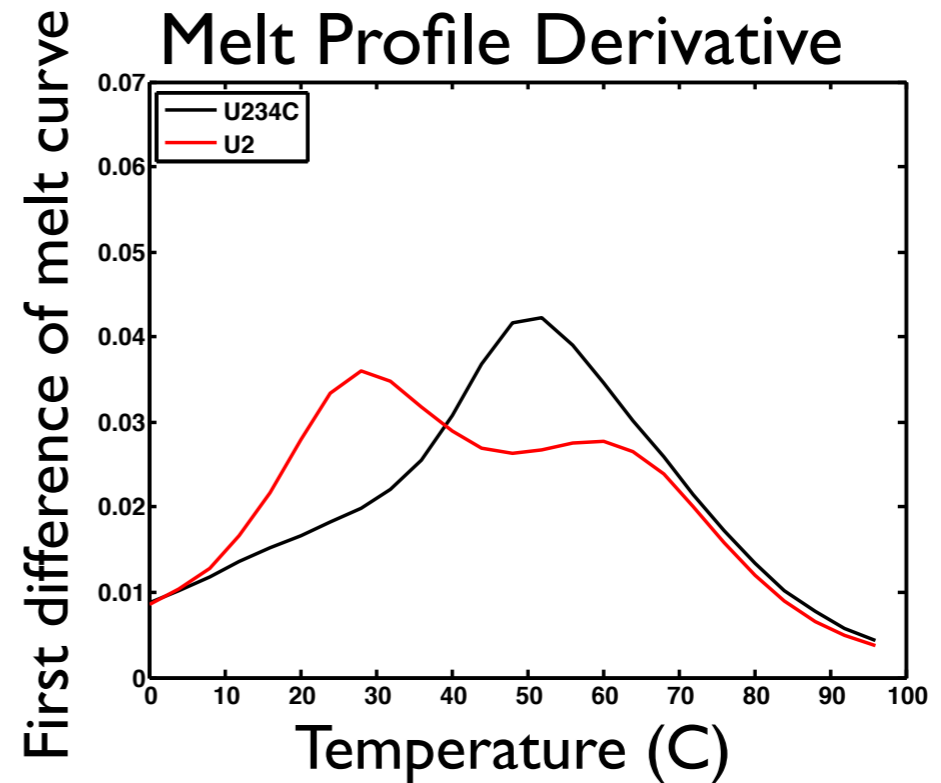

# U234G

Same

MFE structure at 0.0 C

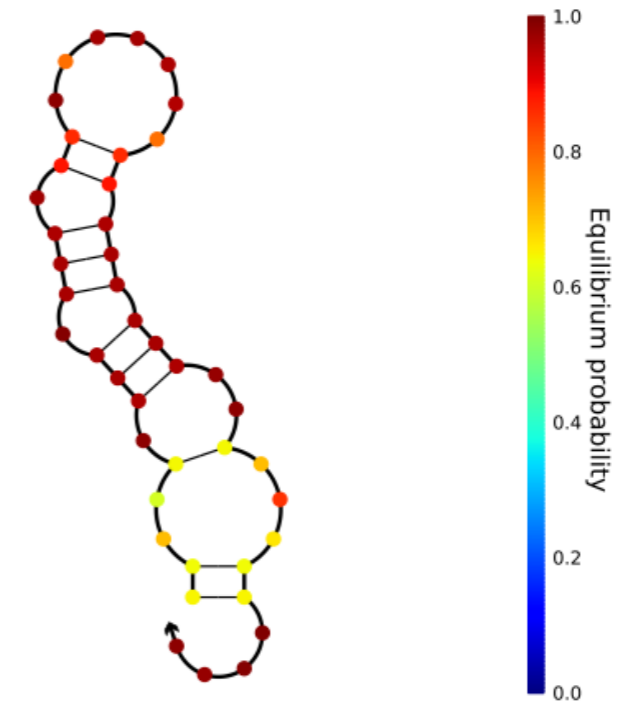

Free energy of secondary structure: -16.84 kcal/mol

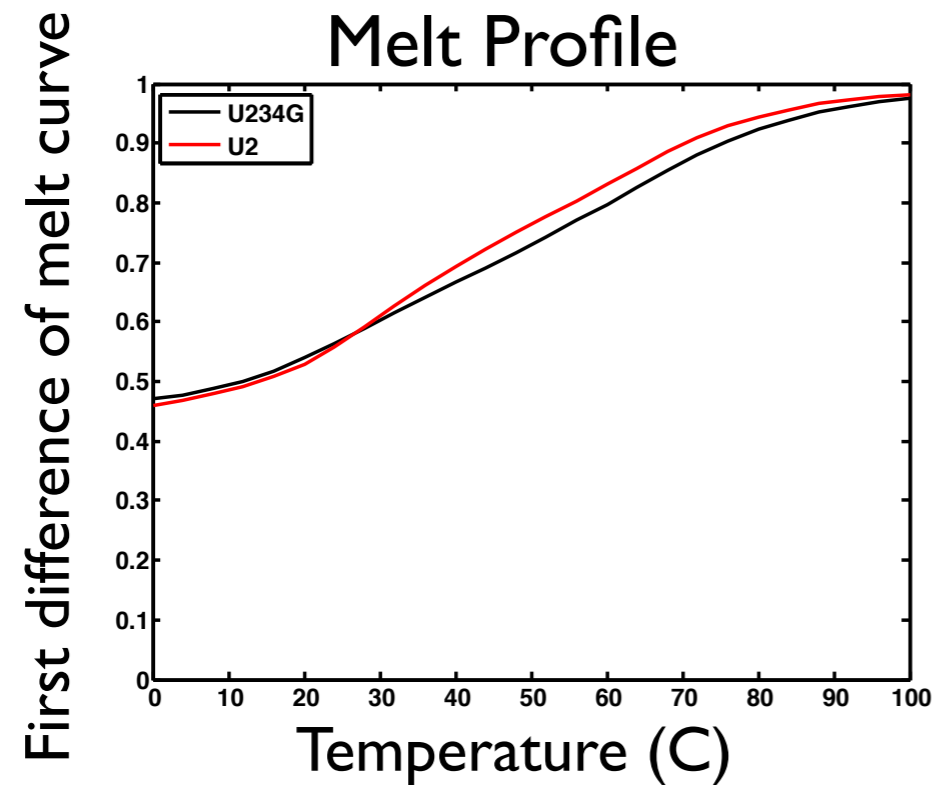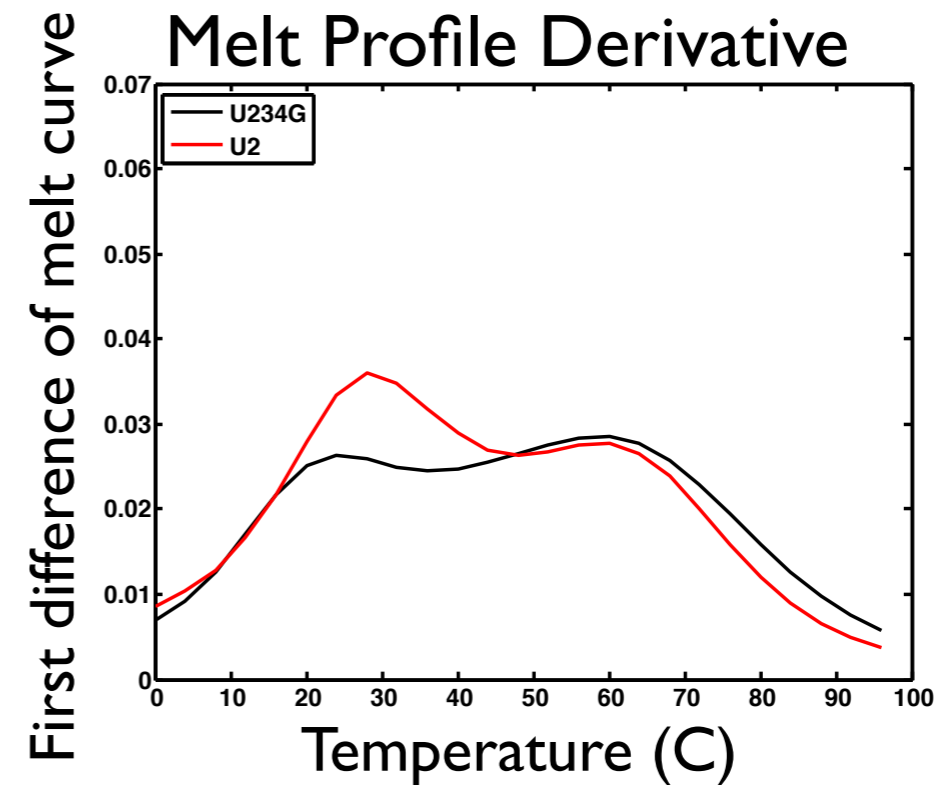

# U234U

Same

MFE structure at 0.0 C

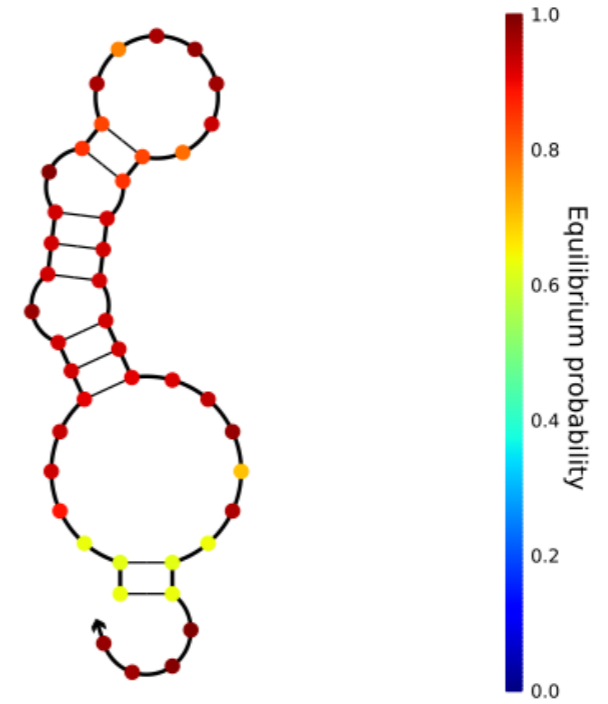

Free energy of secondary structure: -15.45 kcal/mol

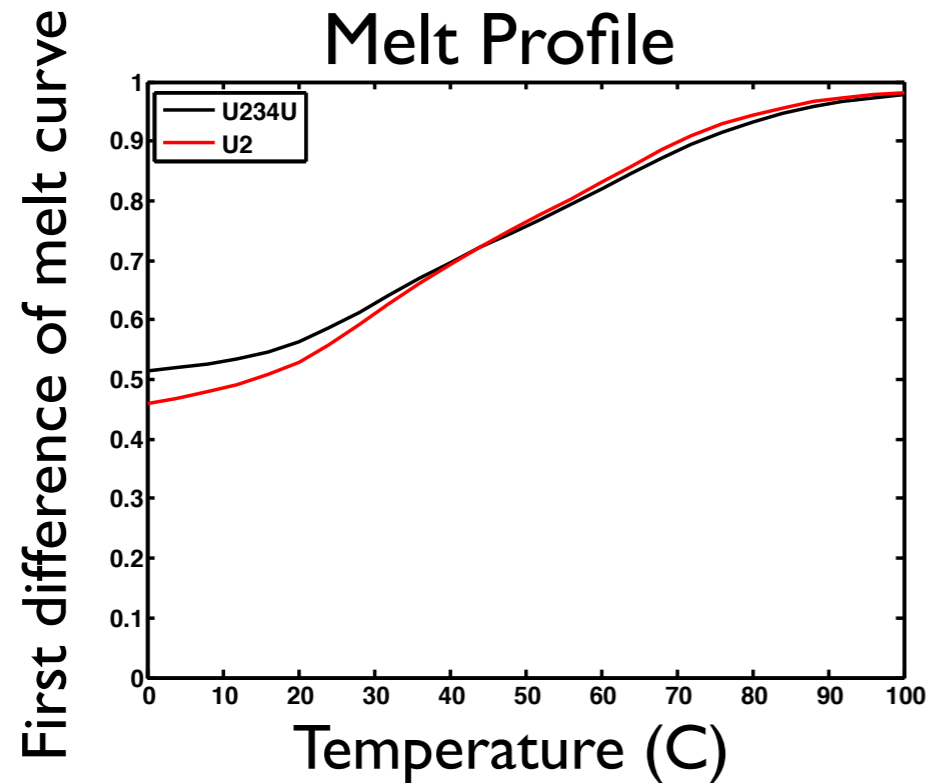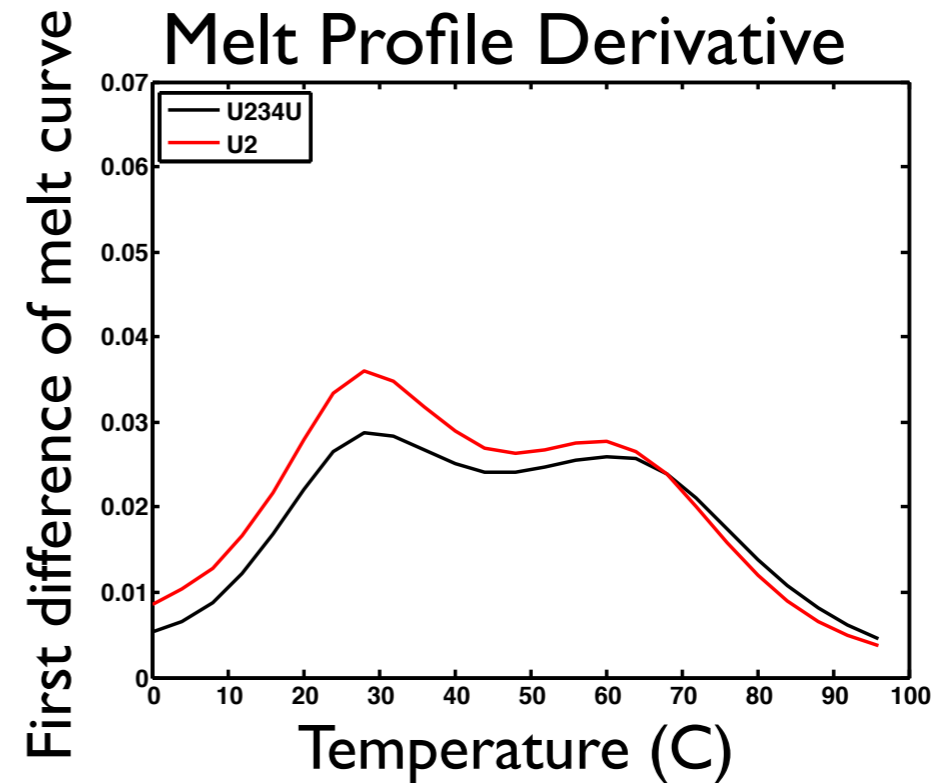

# U2350

Different - shifted

MFE structure at 0.0 C

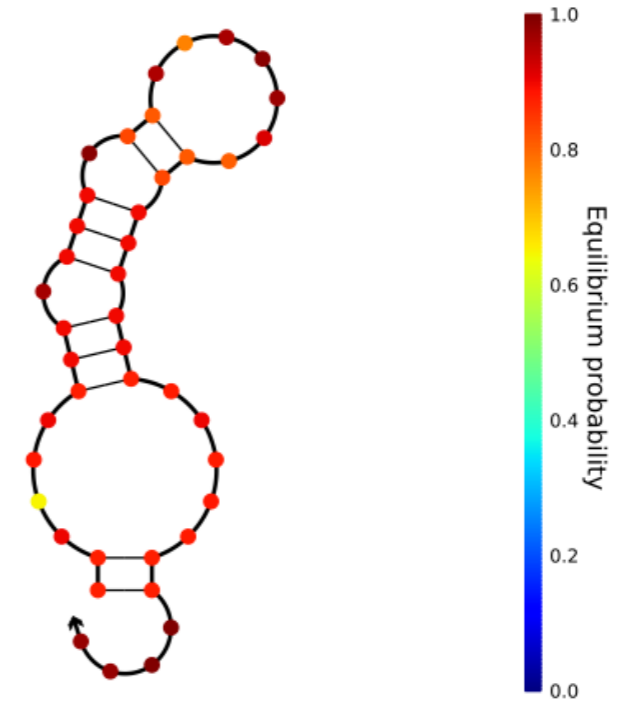

Free energy of secondary structure: -15.89 kcal/mol

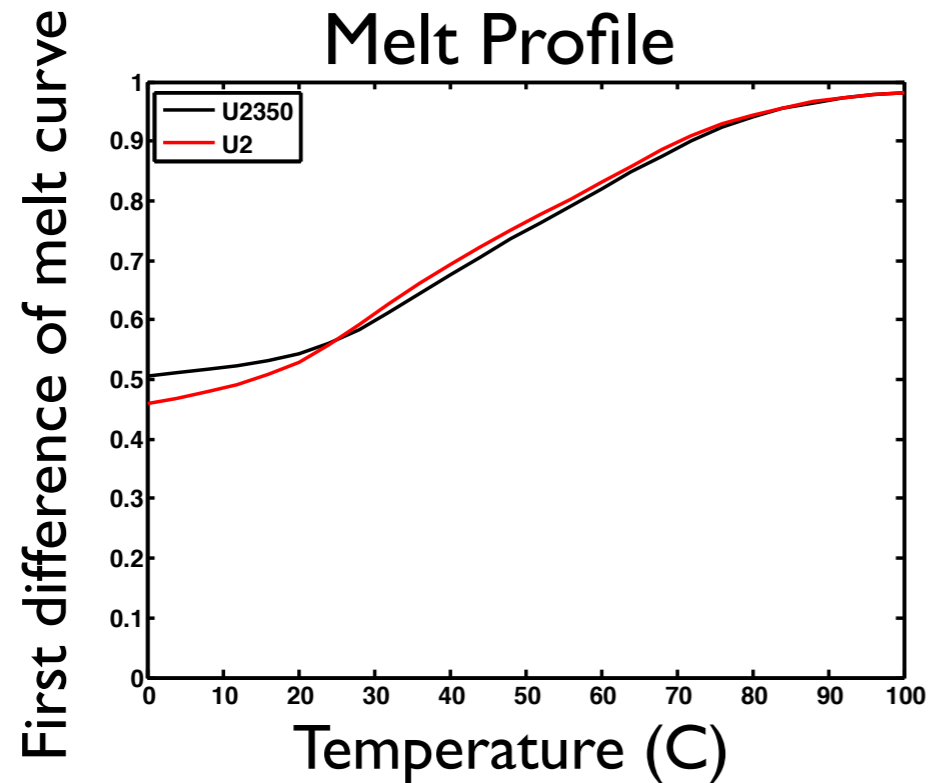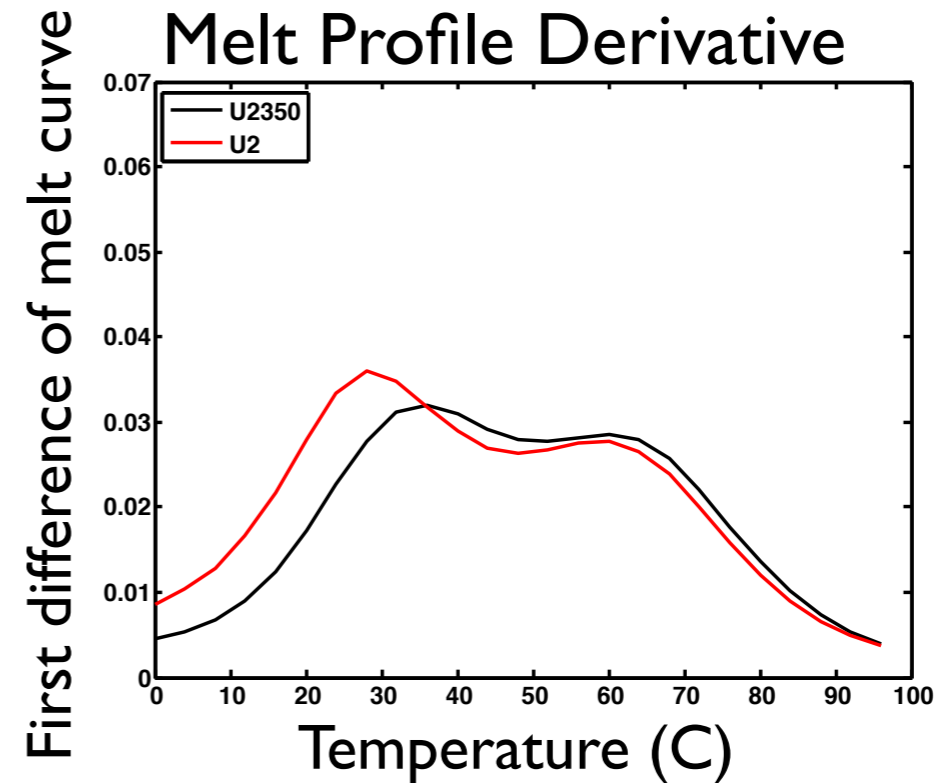

# U235A

Same

MFE structure at 0.0 C

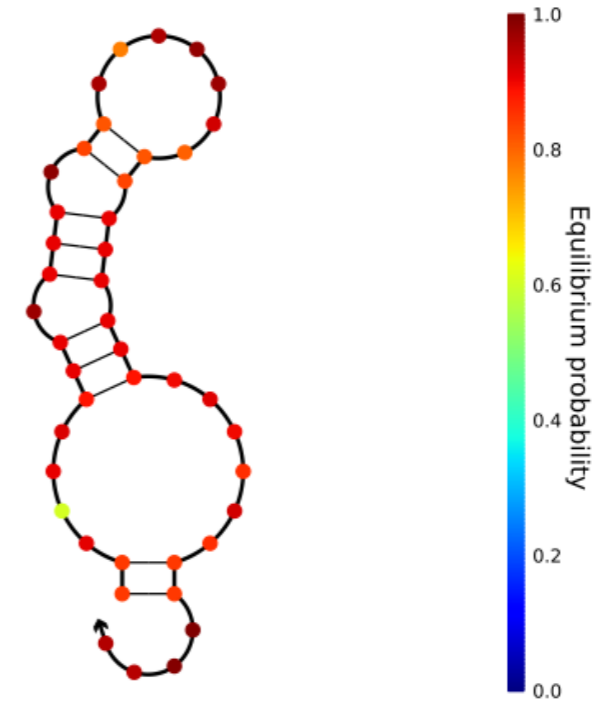

Free energy of secondary structure: -15.45 kcal/mol

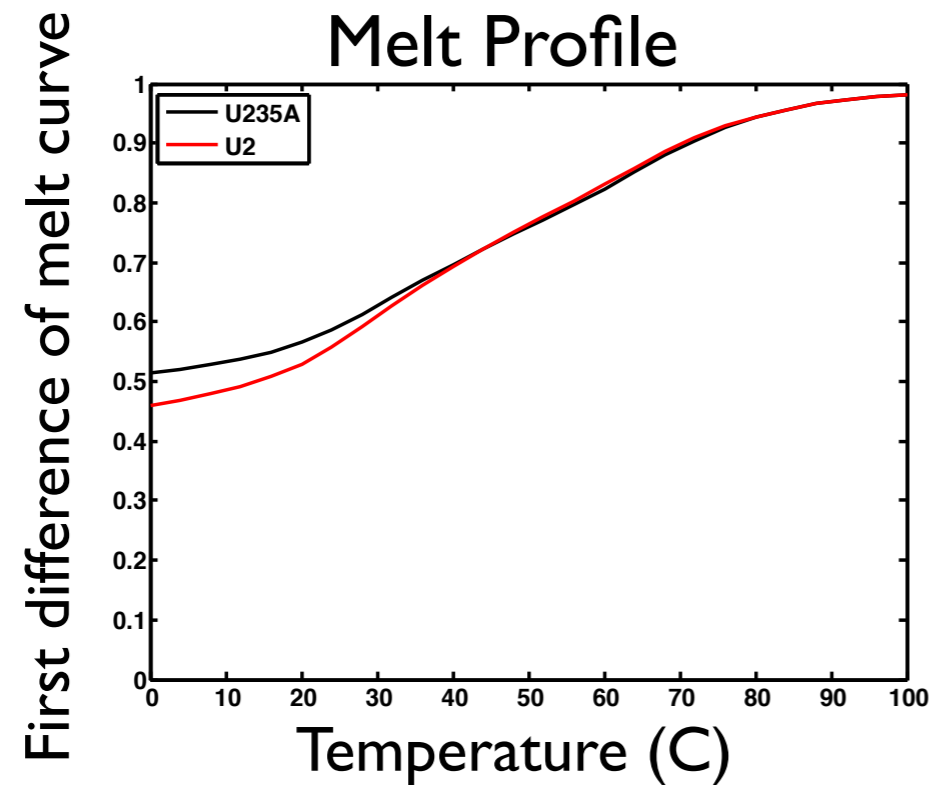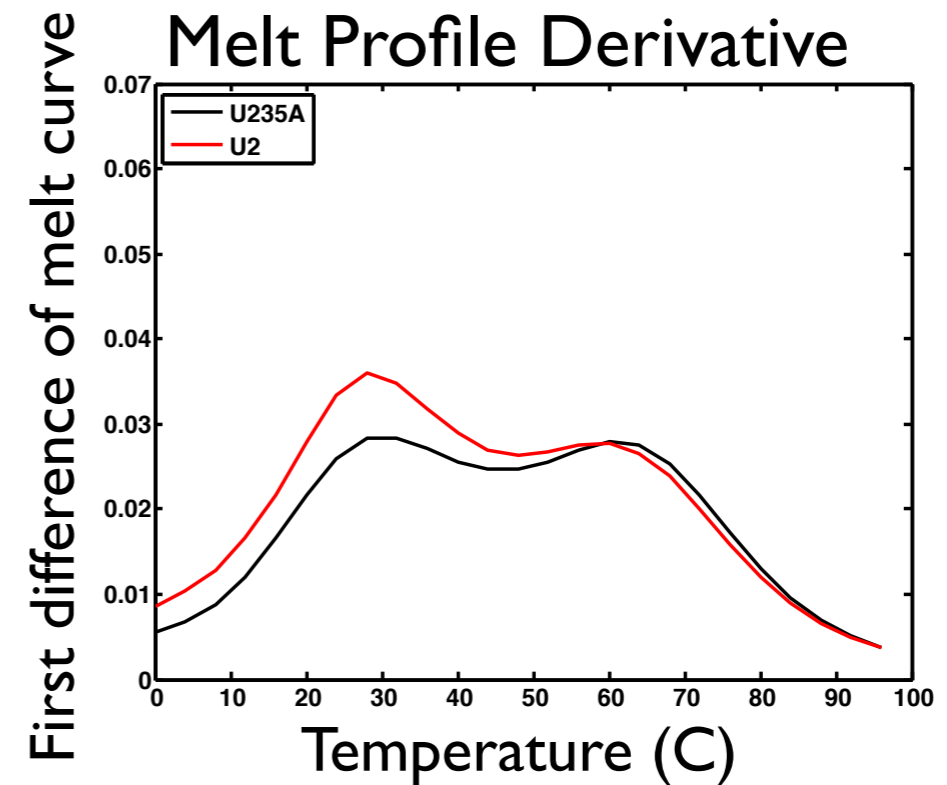

# U235C

Different

MFE structure at 0.0 C

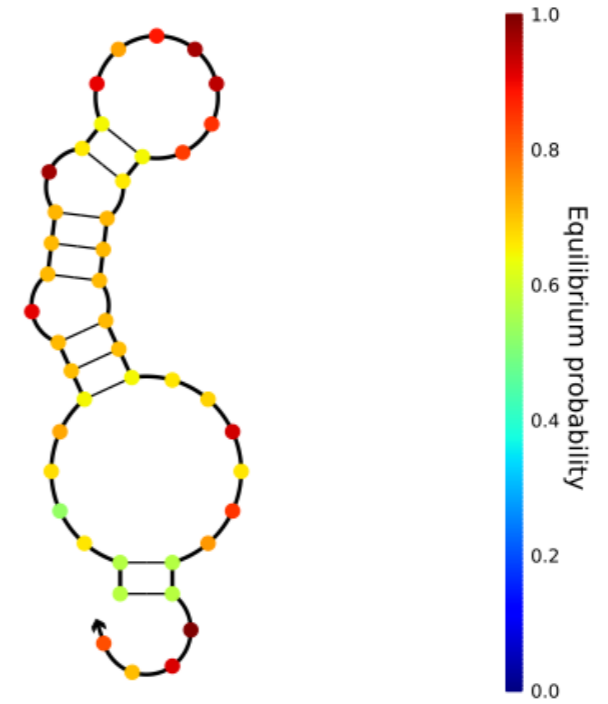

Free energy of secondary structure: -15.45 kcal/mol

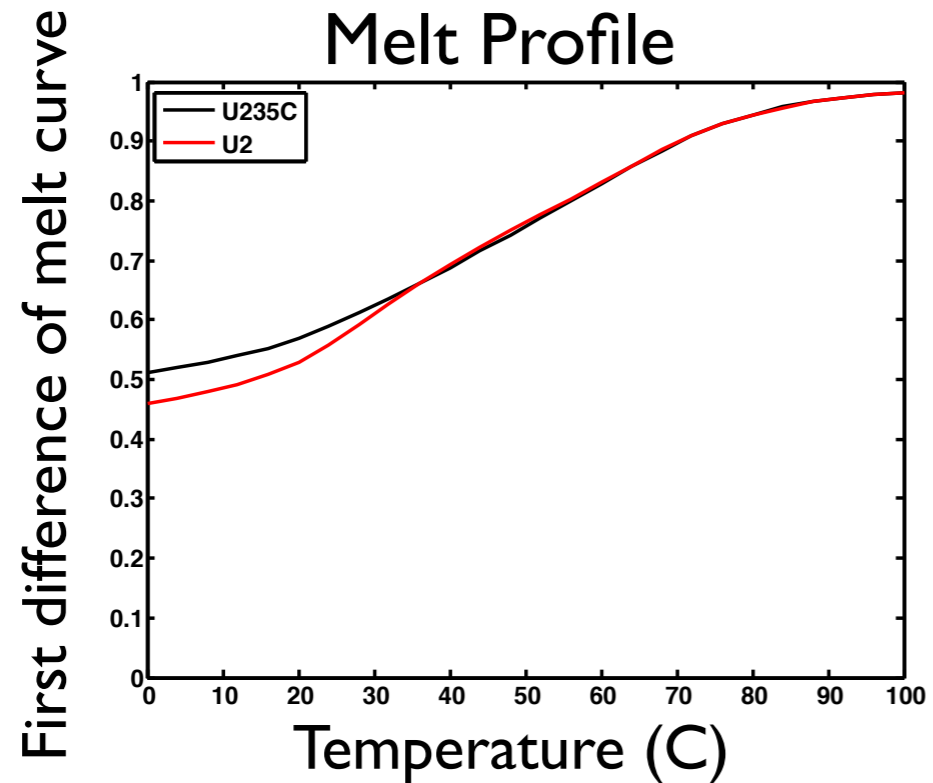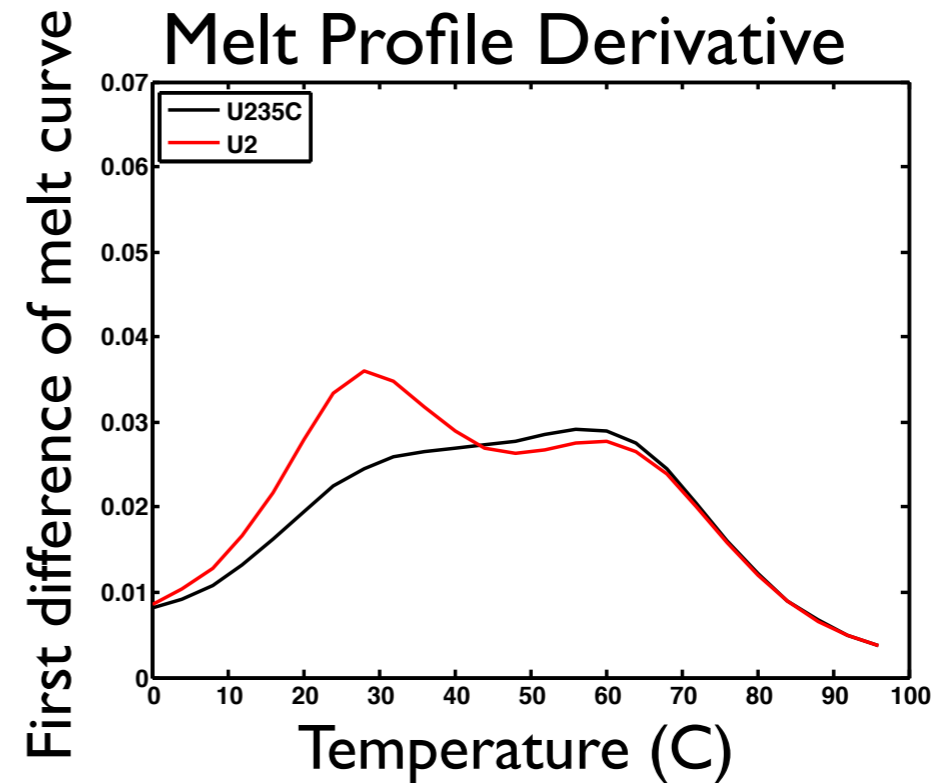

# U235G

Different - Threshold, shifted

MFE structure at 0.0 C

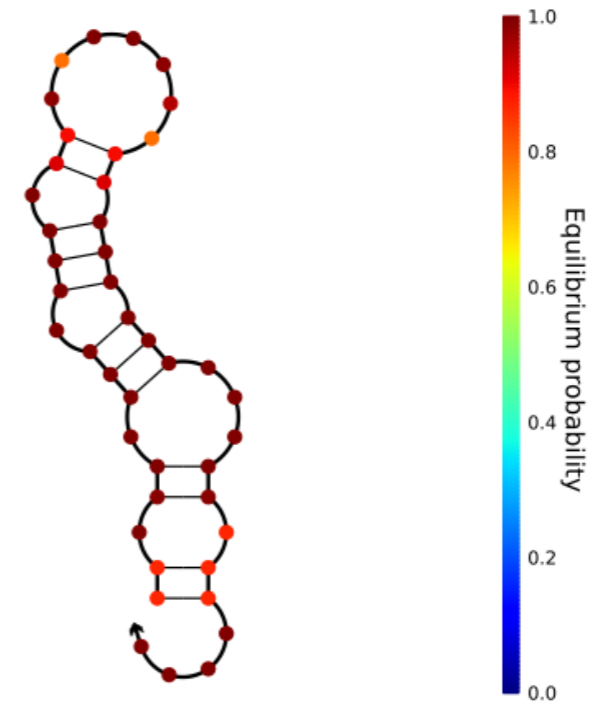

Free energy of secondary structure: -19.34 kcal/mol

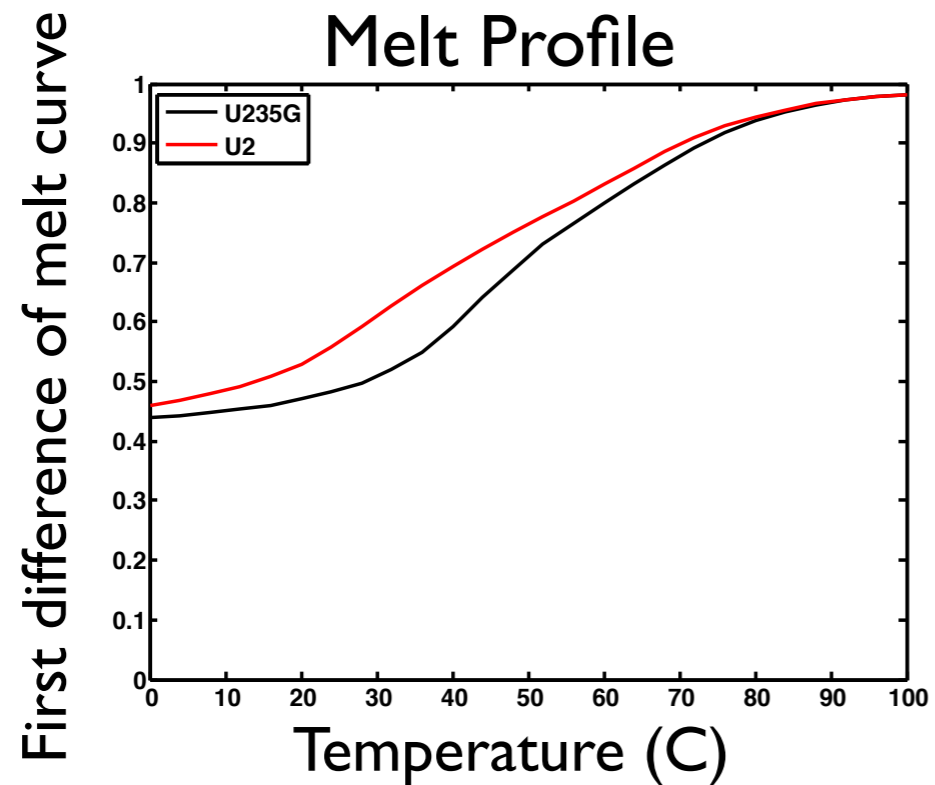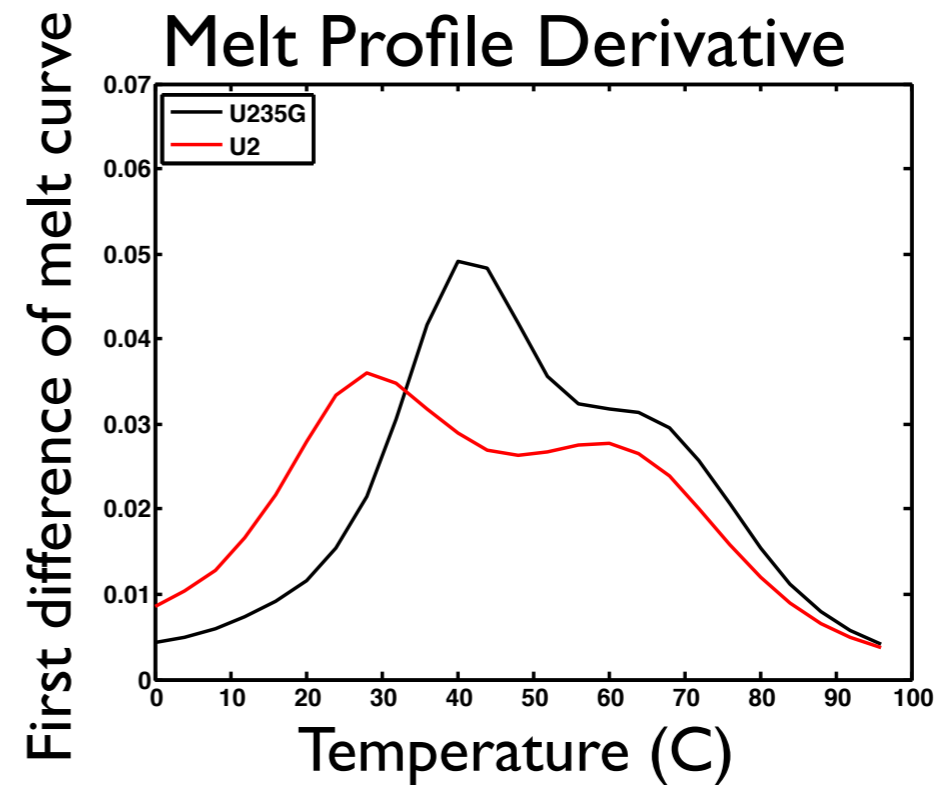

# U2370

Different - Threshold

MFE structure at 0.0 C

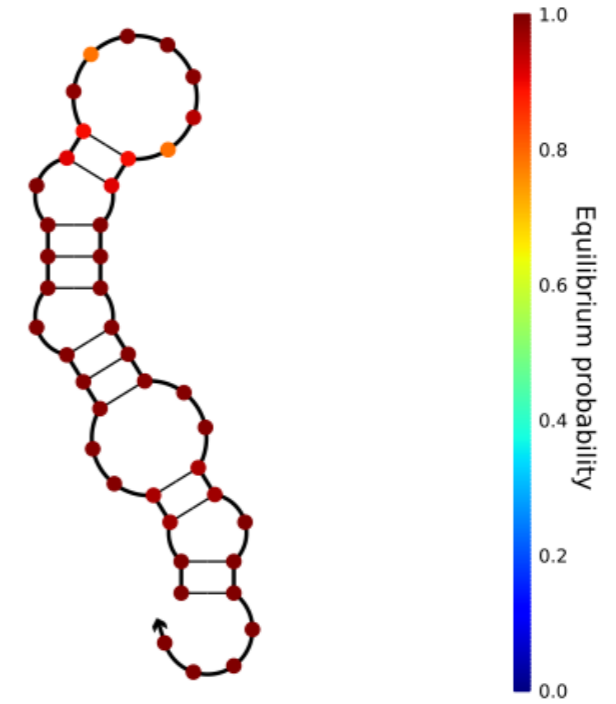

Free energy of secondary structure: -17.59 kcal/mol

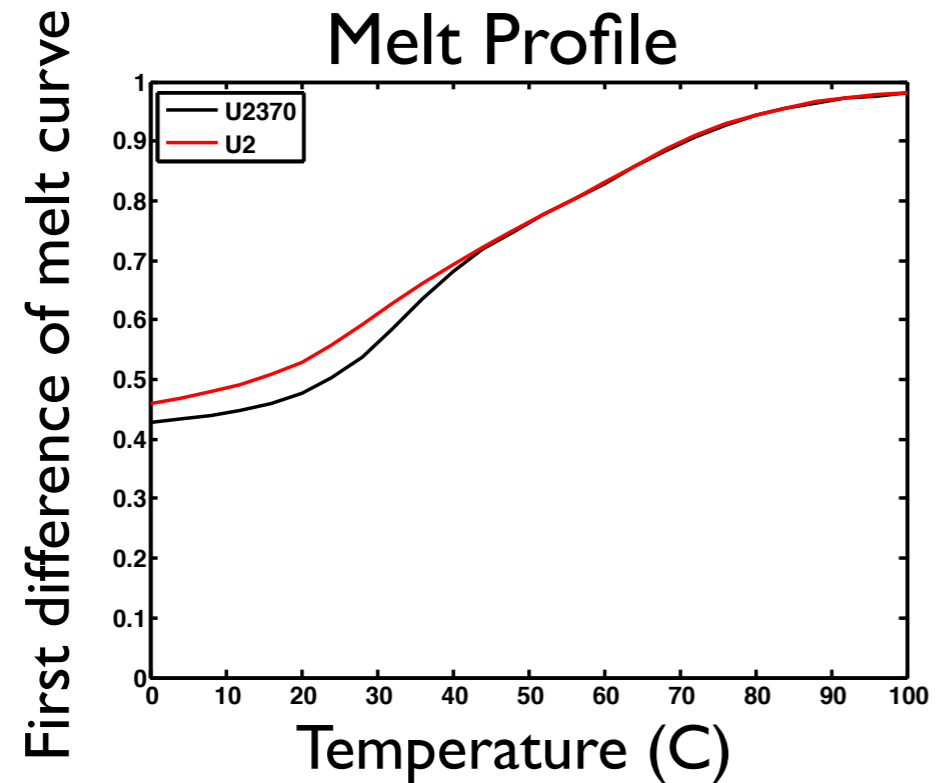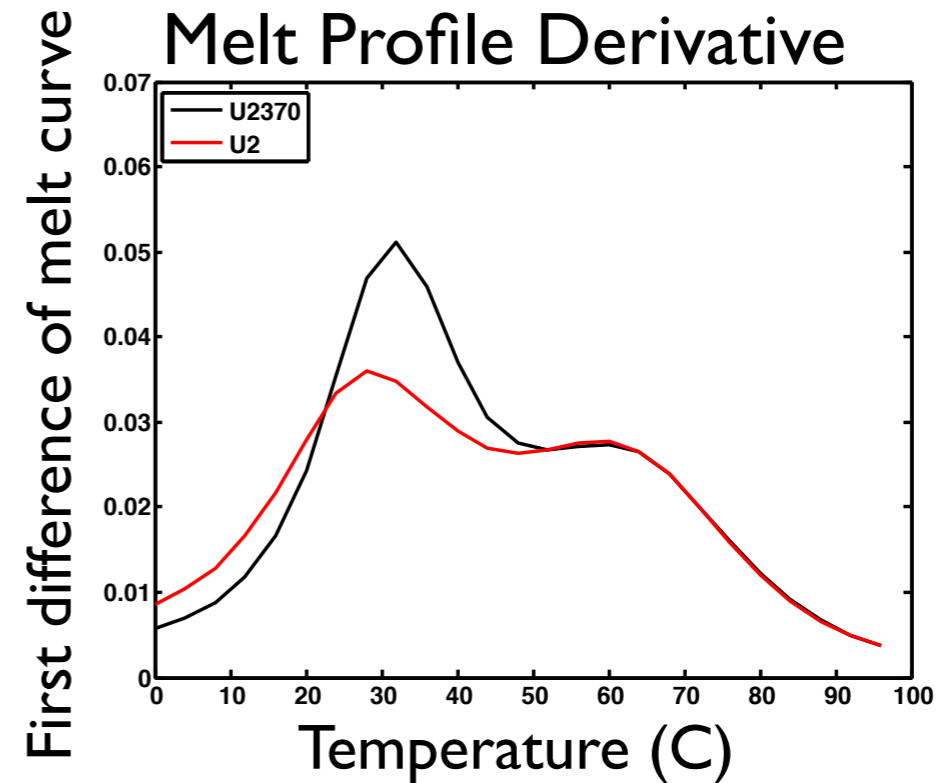



# U237A

Same

MFE structure at 0.0 C

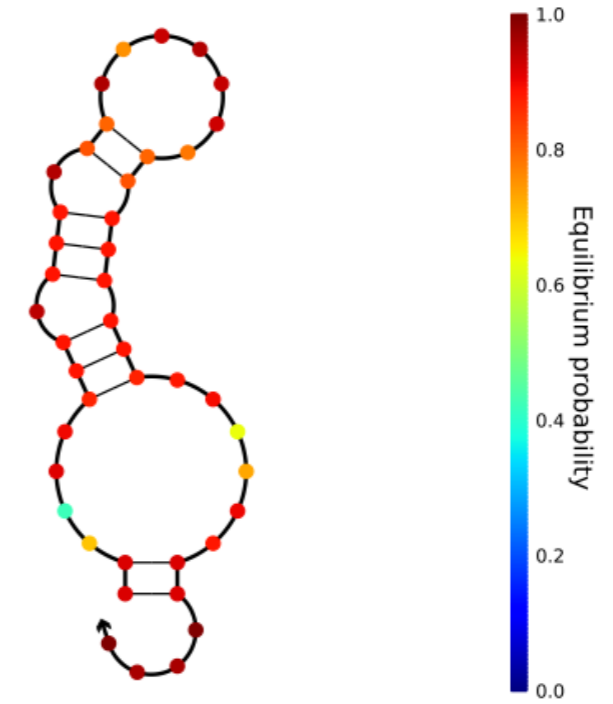

Free energy of secondary structure: -15.02 kcal/mol

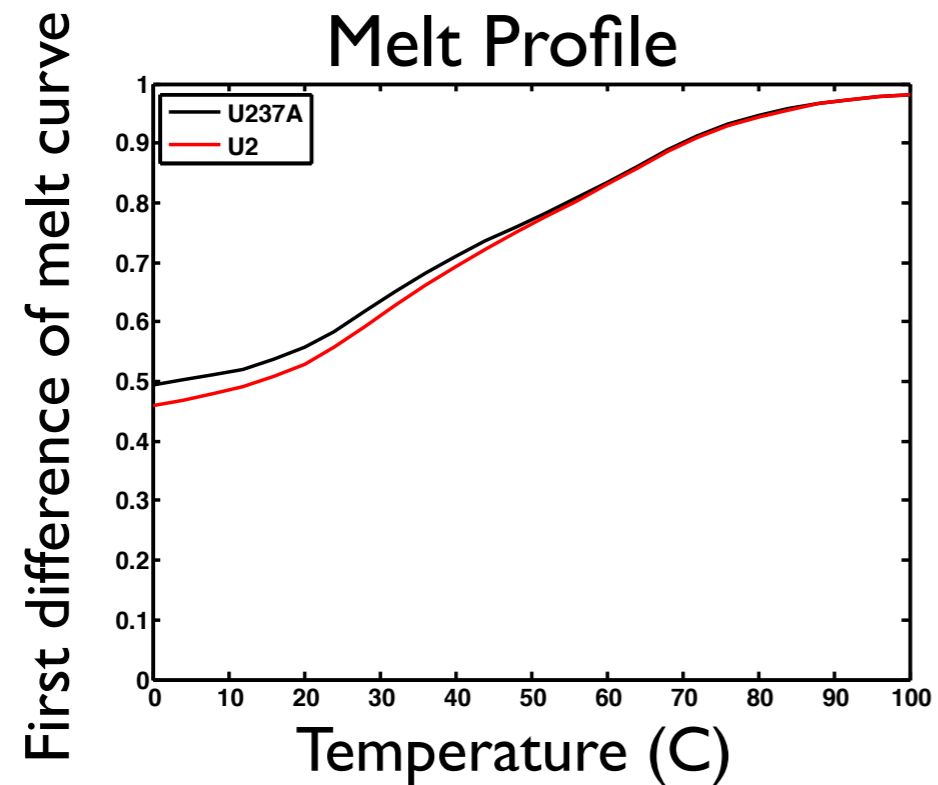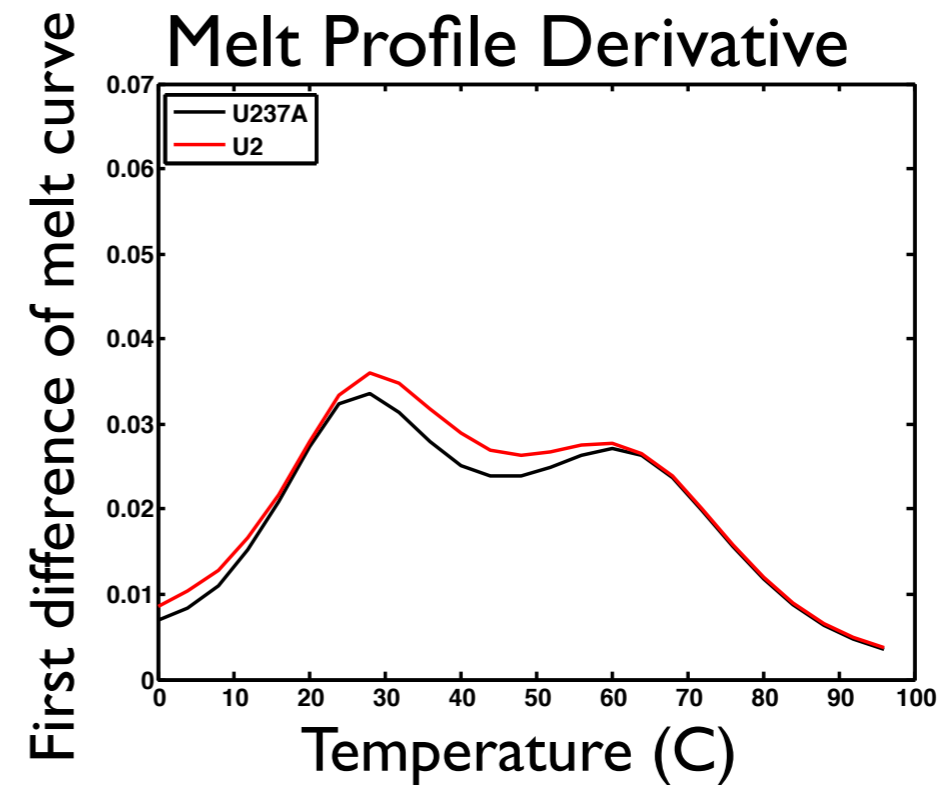

# U237G

Different - shifted

MFE structure at 0.0 C

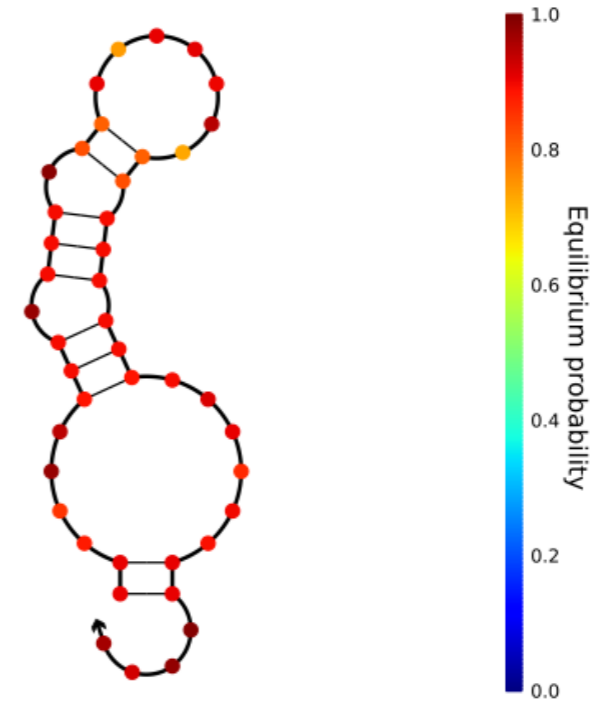

Free energy of secondary structure: -16.13 kcal/mol

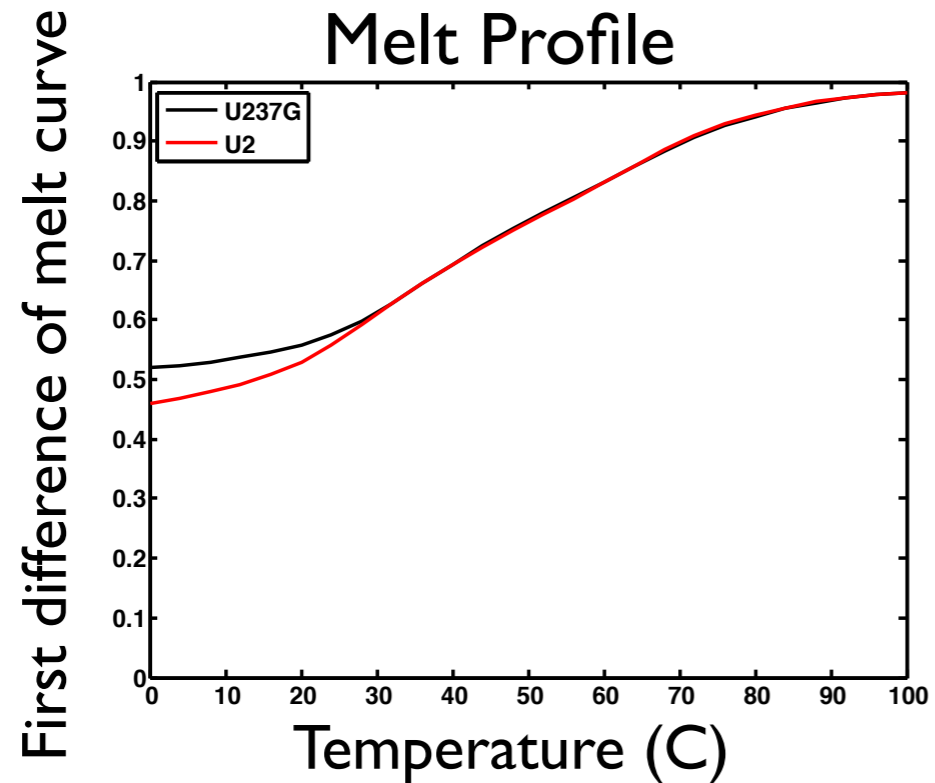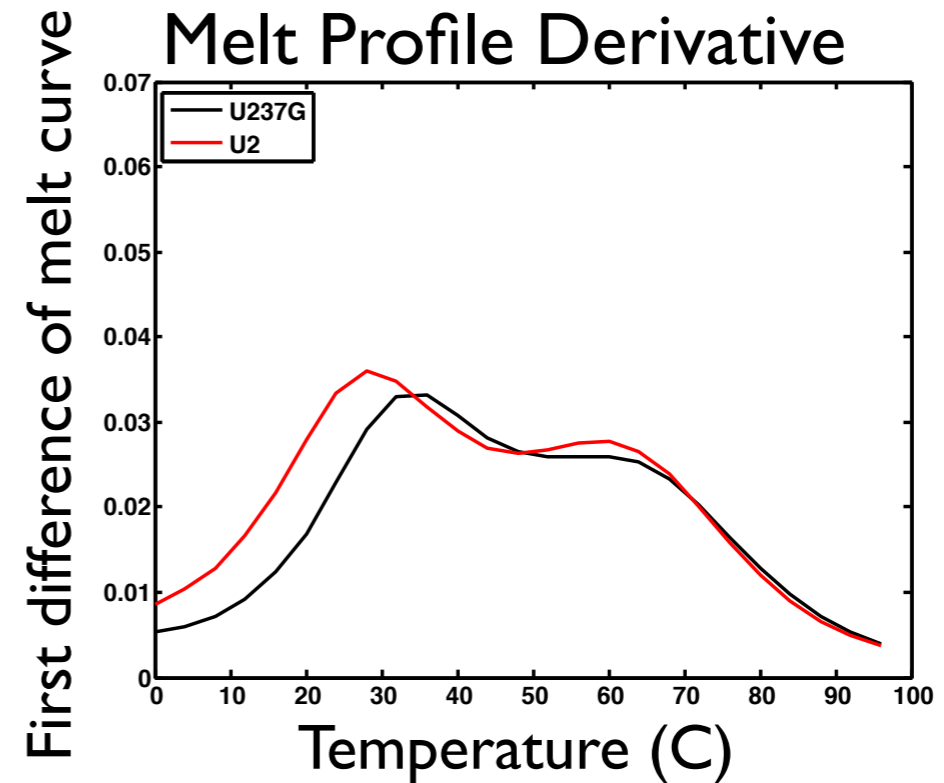

# U237U

Different - threshold, shifted

MFE structure at 0.0 C

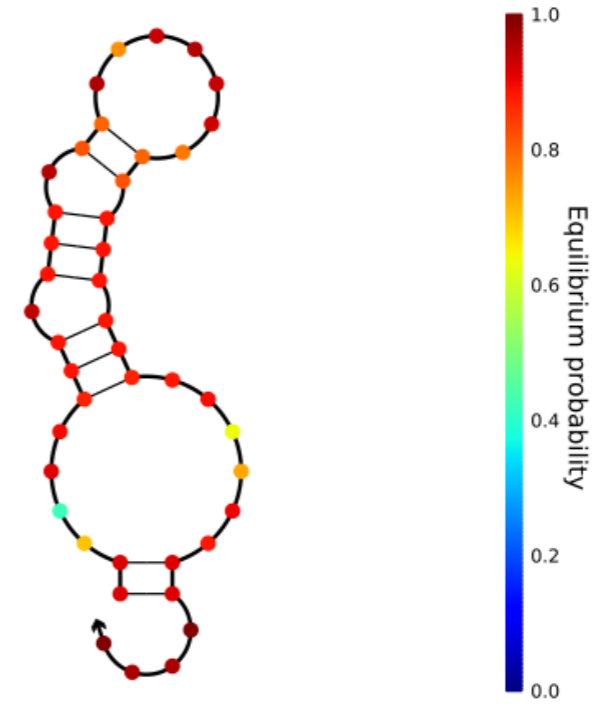

Free energy of secondary structure: -15.02 kcal/mol

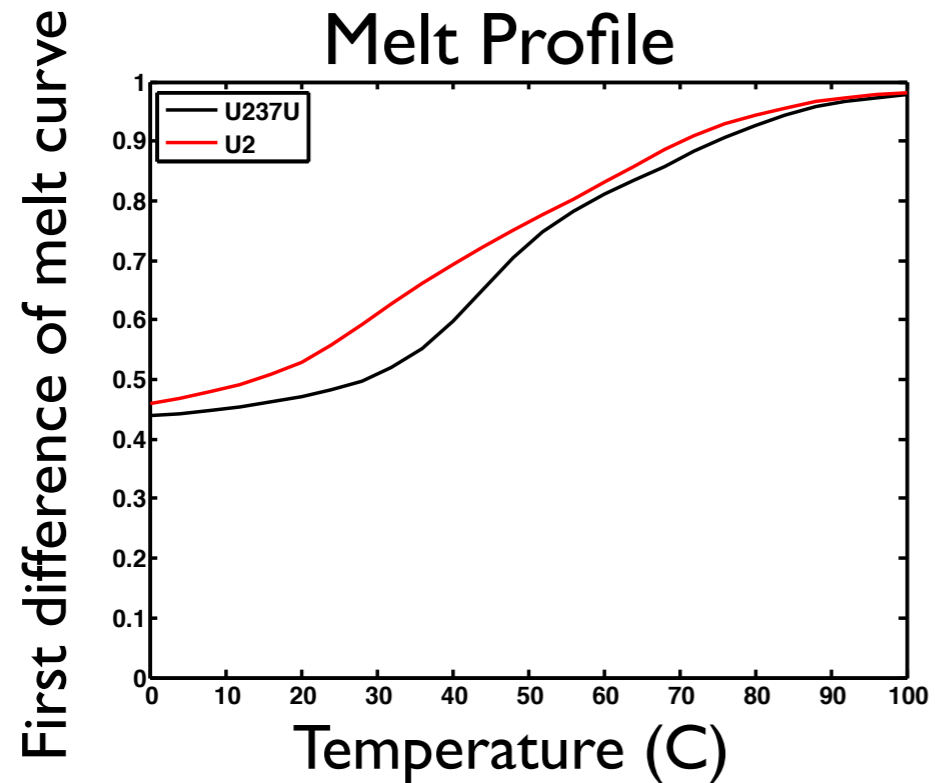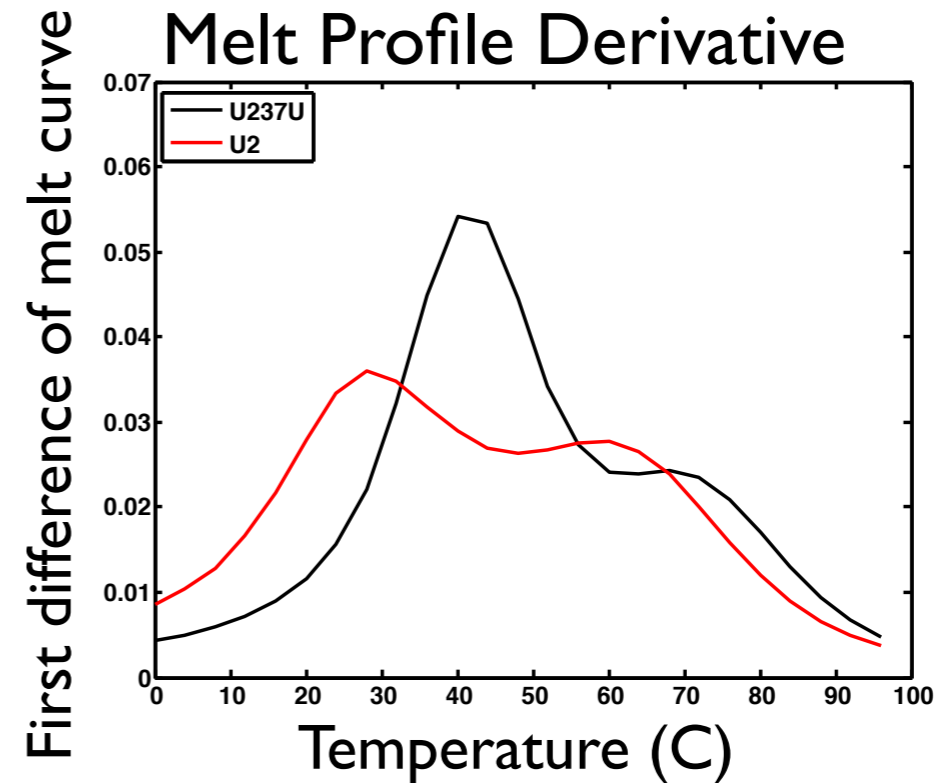

# U2380

Different - Threshold

MFE structure at 0.0 C



Free energy of secondary structure: -17.59 kcal/mol

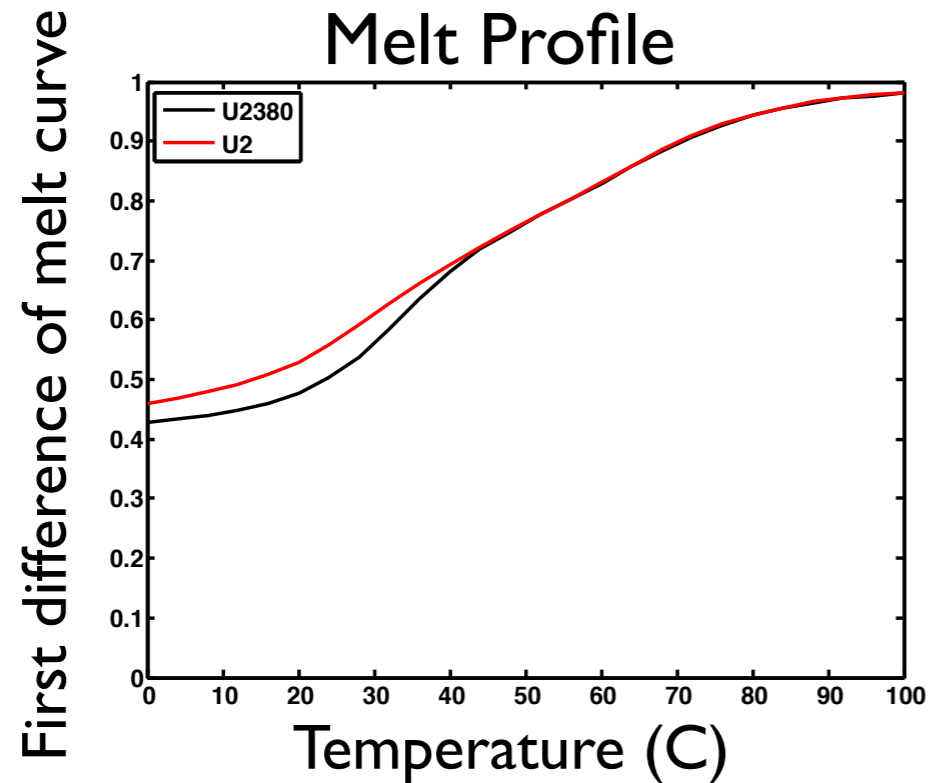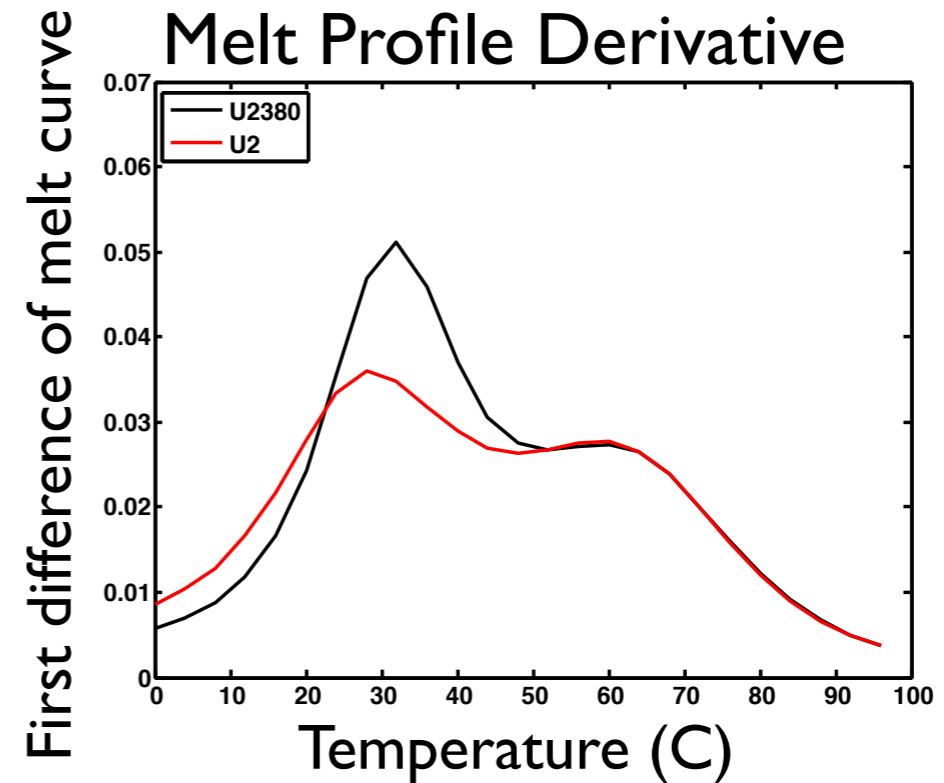

# U238A

Different - Linear

MFE structure at 0.0 C

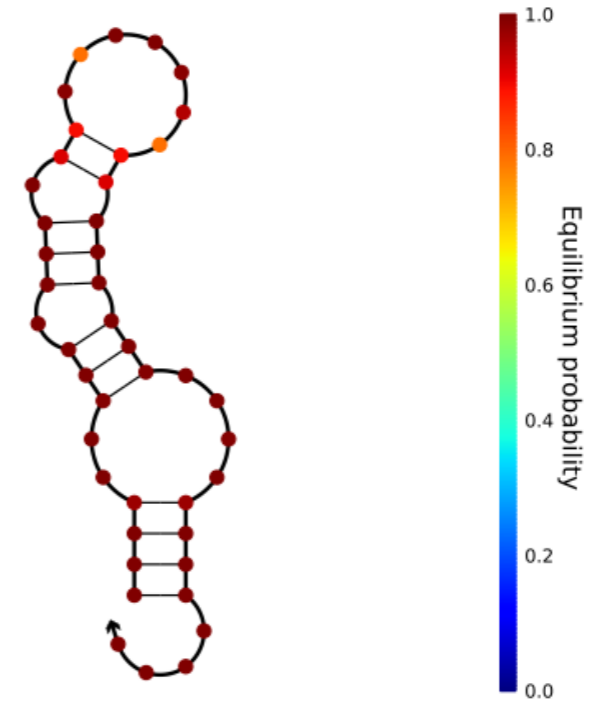

Free energy of secondary structure: -19.79 kcal/mol

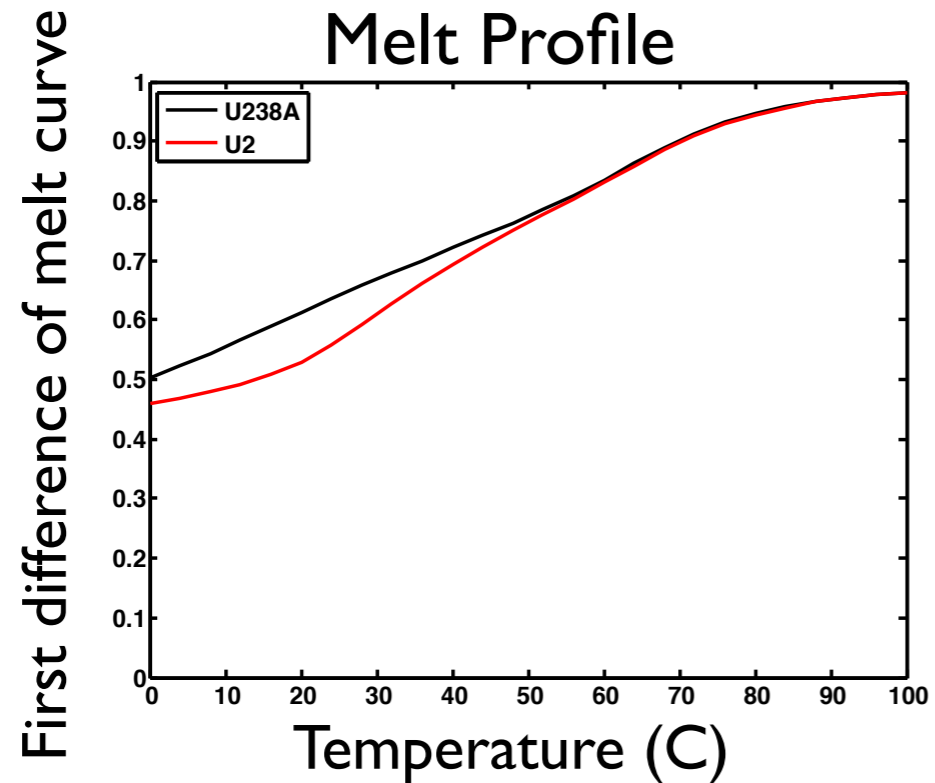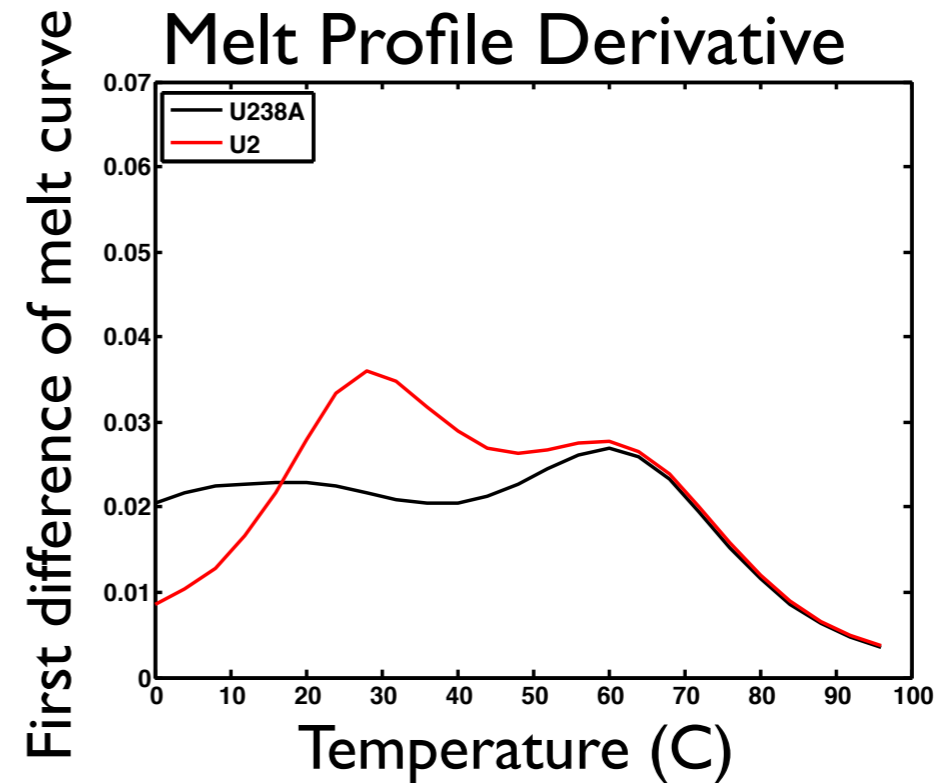

# U238G

Different - Linear

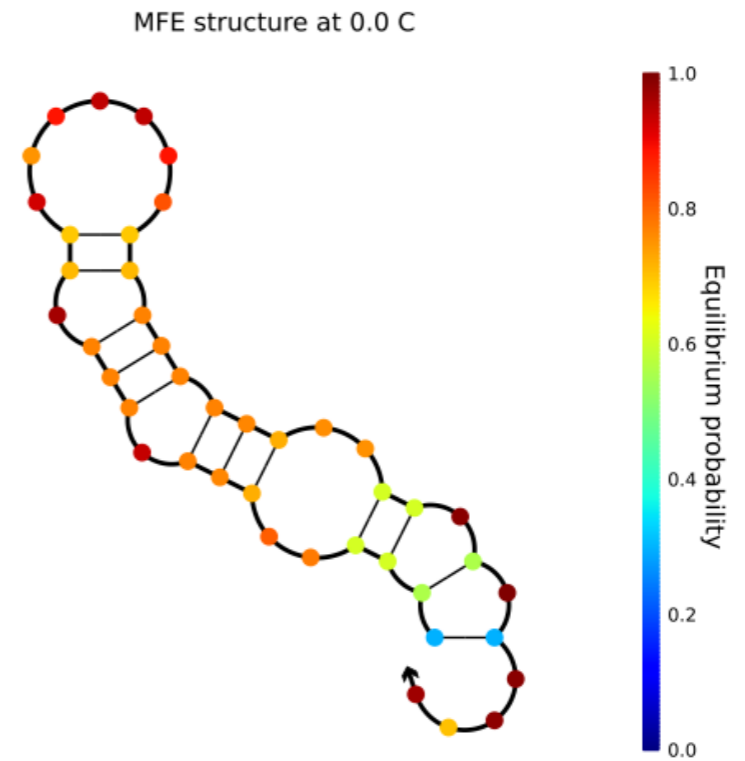

Free energy of secondary structure: -14.15 kcal/mol

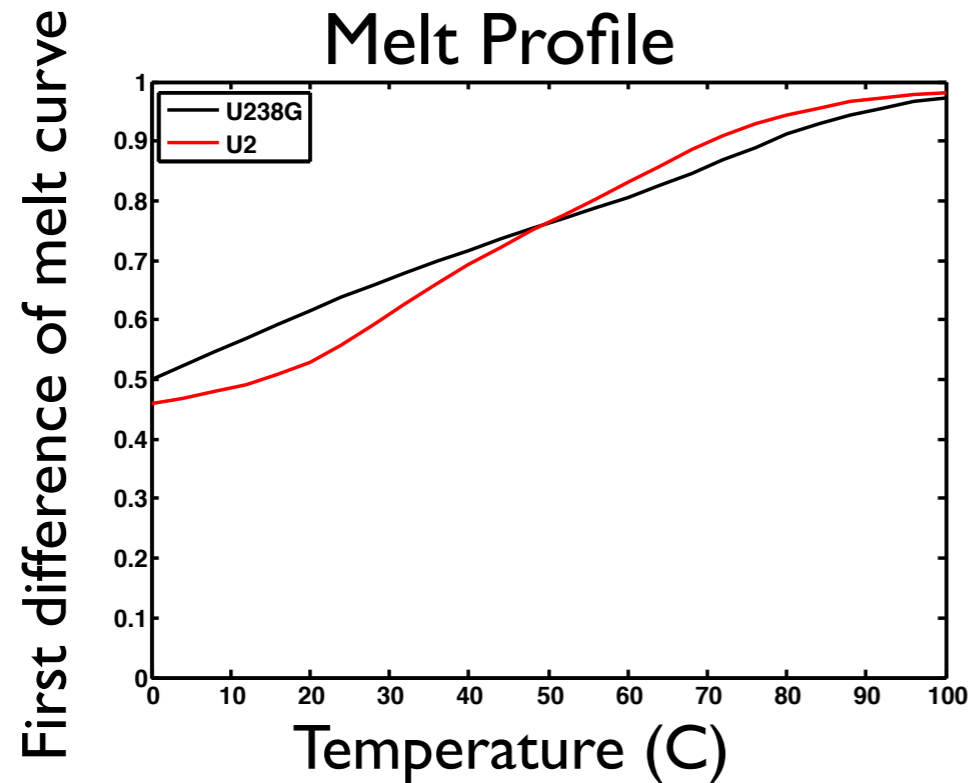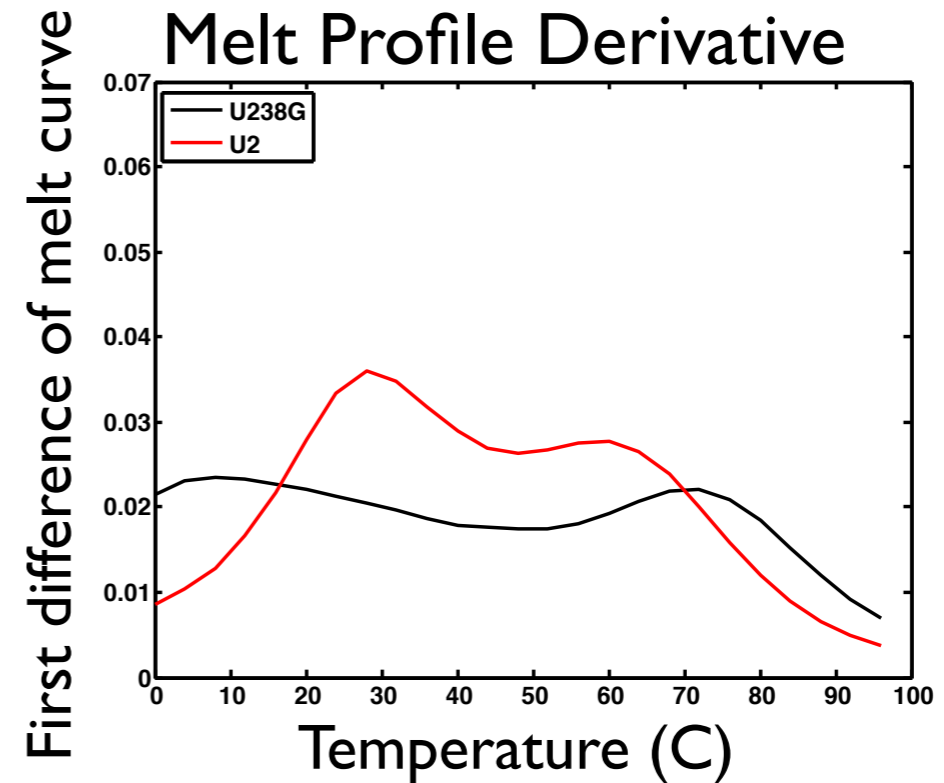

# U238U

Different - Linear

MFE structure at 0.0 C

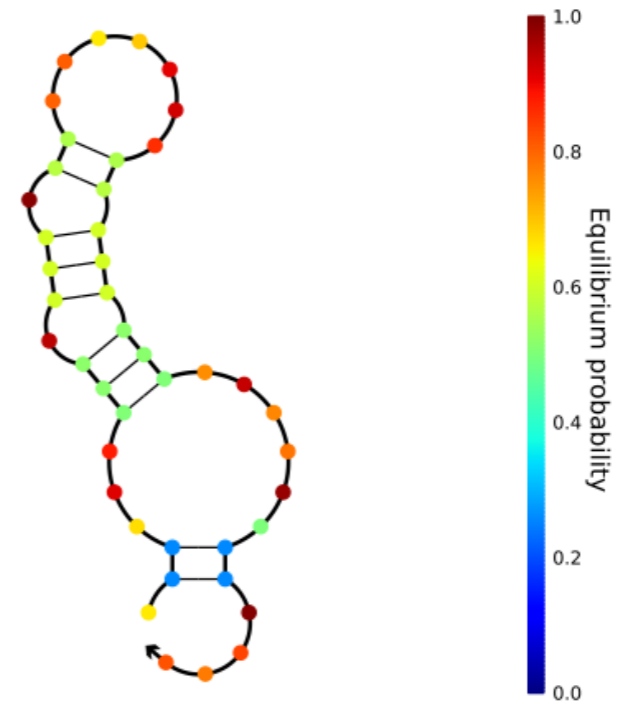

Free energy of secondary structure: -14.42 kcal/mol

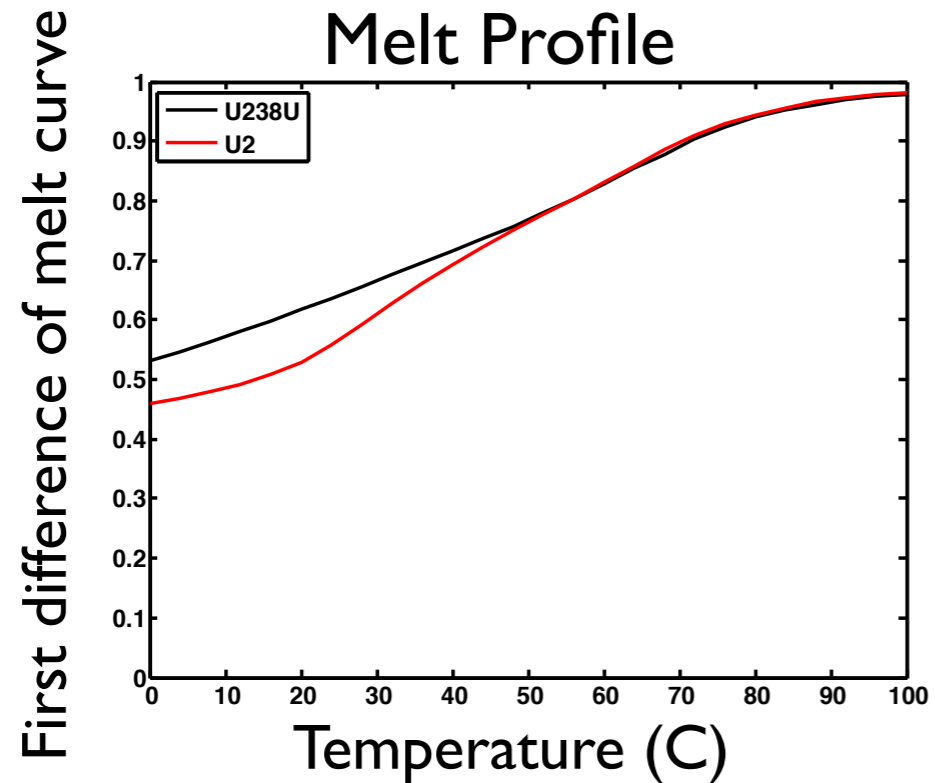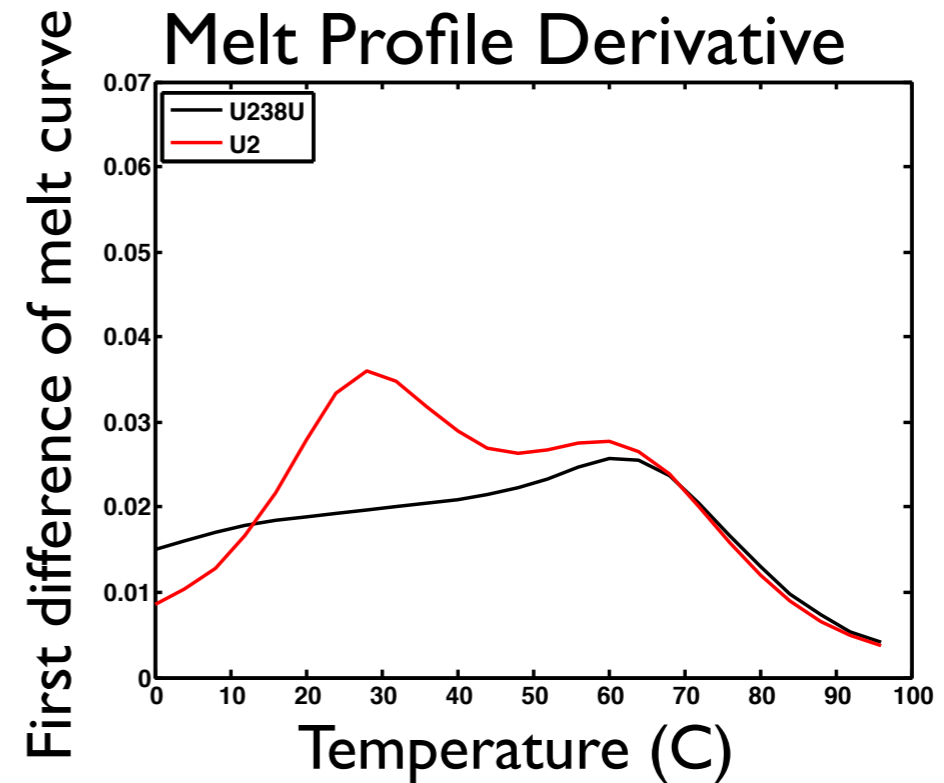

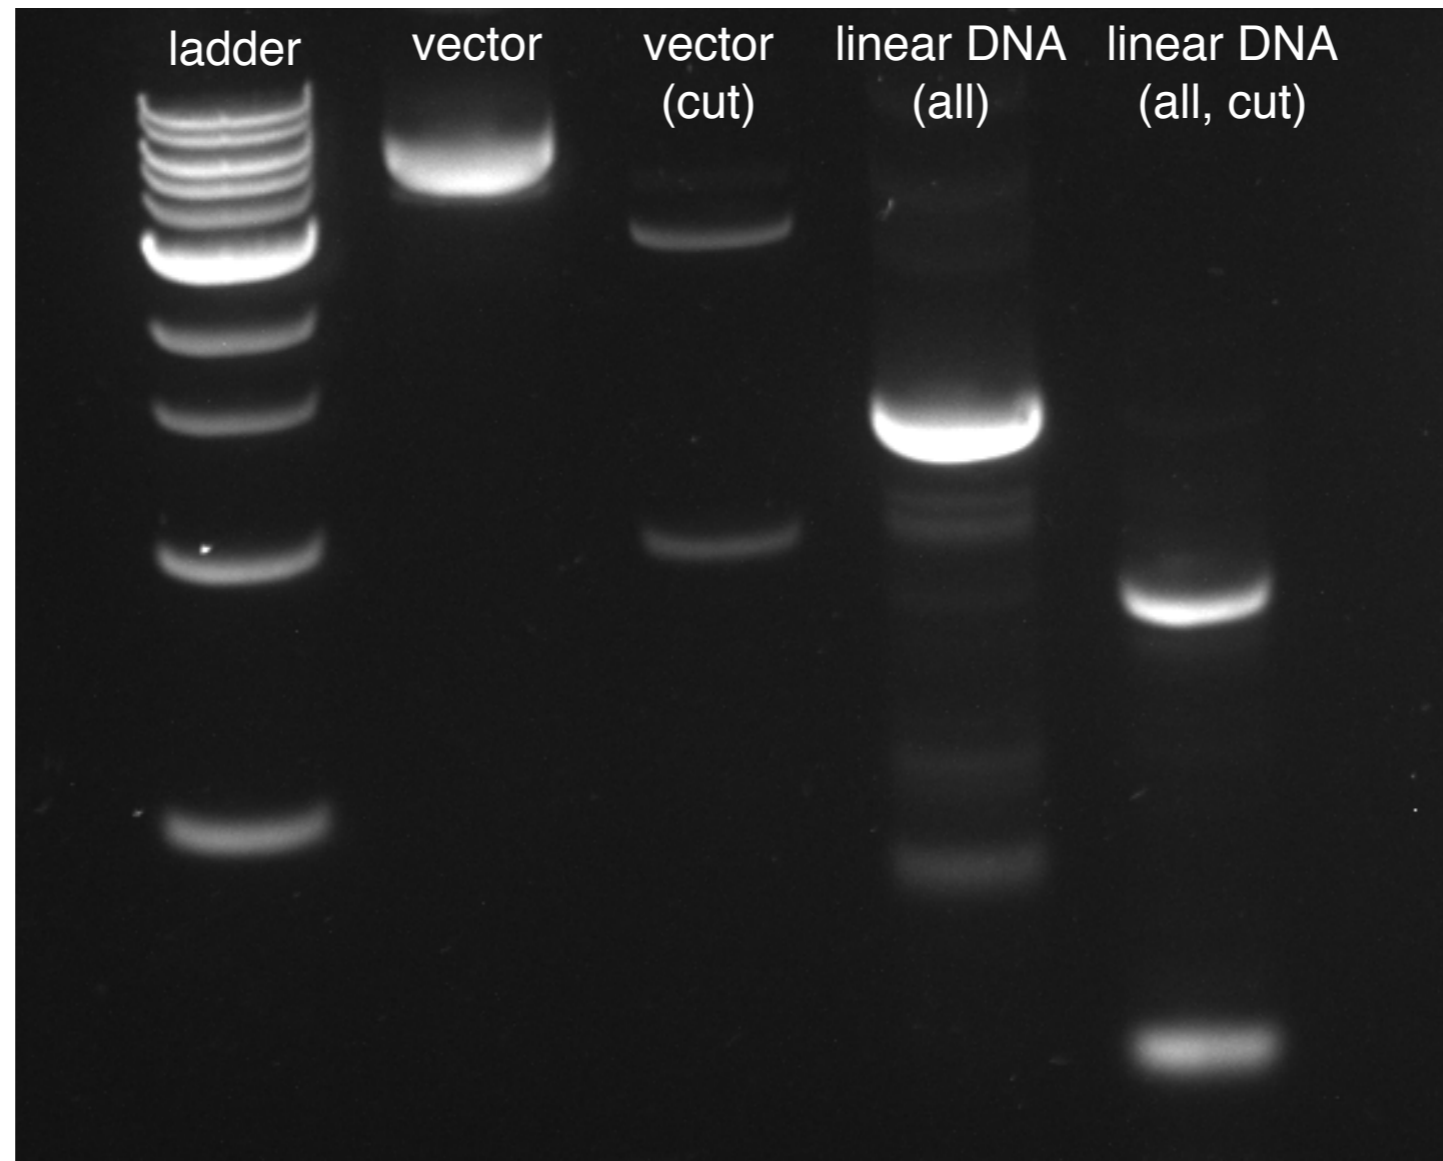

Note:

1. Mixture of all linear DNA from the library has very strong band at expected size (column 4). Therefore, most linear DNA used in TXTL reaction synthesised as expected.



|      |                                                                             |        |                                                                       |
|------|-----------------------------------------------------------------------------|--------|-----------------------------------------------------------------------|
| U210 | <u>_</u> GAUCC <u>C</u> UCACU <u>U</u> <i>ACUAGUCUGCAG</i> <u>A</u> AGGAGAU | U210_F | GACGTGAGGGGGCAGGGATGGCTATATTTCTGGGA_GATCCCTCACTTACTAGTCTGCAG          |
|      |                                                                             | U210_R | GGGTATATCTCCTTCTGCAGACTAGTAAGTGAGGGATC_TCCCAGAAATATAGCCATCCC          |
| U21A | <u>A</u> GAUCC <u>C</u> UCACU <u>U</u> <i>ACUAGUCUGCAG</i> <u>A</u> AGGAGAU | U21A_F | GACGTGAGGGGGCAGGGATGGCTATATTTCTGGGA <u>A</u> GATCCCTCACTTACTAGTCTGCAG |
|      |                                                                             | U21A_R | GGGTATATCTCCTTCTGCAGACTAGTAAGTGAGGGATC <u>I</u> TCCCAGAAATATAGCCATCCC |
| U21C | <u>C</u> GAUCC <u>C</u> UCACU <u>U</u> <i>ACUAGUCUGCAG</i> <u>A</u> AGGAGAU | U21C_F | GACGTGAGGGGGCAGGGATGGCTATATTTCTGGGA <u>C</u> GATCCCTCACTTACTAGTCTGCAG |
|      |                                                                             | U21C_R | GGGTATATCTCCTTCTGCAGACTAGTAAGTGAGGGATC <u>G</u> TCCCAGAAATATAGCCATCCC |
| U21U | <u>U</u> GAUCC <u>C</u> UCACU <u>U</u> <i>ACUAGUCUGCAG</i> <u>A</u> AGGAGAU | U21U_F | GACGTGAGGGGGCAGGGATGGCTATATTTCTGGGA <u>I</u> GATCCCTCACTTACTAGTCTGCAG |
|      |                                                                             | U21U_R | GGGTATATCTCCTTCTGCAGACTAGTAAGTGAGGGATC <u>A</u> TCCCAGAAATATAGCCATCCC |
| U220 | <u>G</u> AUCC <u>C</u> UCACU <u>U</u> <i>ACUAGUCUGCAG</i> <u>A</u> AGGAGAU  | U220_F | GACGTGAGGGGGCAGGGATGGCTATATTTCTGGGAG_ATCCCTCACTTACTAGTCTGCAG          |
|      |                                                                             | U220_R | GGGTATATCTCCTTCTGCAGACTAGTAAGTGAGGGAT_CTCCCAGAAATATAGCCATCC           |
| U22A | <u>A</u> AUCC <u>C</u> UCACU <u>U</u> <i>ACUAGUCUGCAG</i> <u>A</u> AGGAGAU  | U22A_F | GACGTGAGGGGGCAGGGATGGCTATATTTCTGGGAG <u>A</u> ATCCCTCACTTACTAGTCTGCAG |
|      |                                                                             | U22A_R | GGGTATATCTCCTTCTGCAGACTAGTAAGTGAGGGAT <u>I</u> CTCCCAGAAATATAGCCATCC  |
| U22C | <u>C</u> AUCC <u>C</u> UCACU <u>U</u> <i>ACUAGUCUGCAG</i> <u>A</u> AGGAGAU  | U22C_F | GACGTGAGGGGGCAGGGATGGCTATATTTCTGGGAG <u>C</u> ATCCCTCACTTACTAGTCTGCAG |
|      |                                                                             | U22C_R | GGGTATATCTCCTTCTGCAGACTAGTAAGTGAGGGAT <u>G</u> CTCCCAGAAATATAGCCATCC  |
| U22U | <u>U</u> AUCC <u>C</u> UCACU <u>U</u> <i>ACUAGUCUGCAG</i> <u>A</u> AGGAGAU  | U22U_F | GACGTGAGGGGGCAGGGATGGCTATATTTCTGGGAG <u>I</u> ATCCCTCACTTACTAGTCTGCAG |
|      |                                                                             | U22U_R | GGGTATATCTCCTTCTGCAGACTAGTAAGTGAGGGAT <u>A</u> CTCCCAGAAATATAGCCATCC  |
| U230 | <u>G</u> G_UCC <u>C</u> UCACU <u>U</u> <i>ACUAGUCUGCAG</i> <u>A</u> AGGAGAU | U230_F | GACGTGAGGGGGCAGGGATGGCTATATTTCTGGGAGG_TCCCTCACTTACTAGTCTGCAG          |
|      |                                                                             | U230_R | GGGTATATCTCCTTCTGCAGACTAGTAAGTGAGGGA_CCTCCCAGAAATATAGCCATCC           |
| U23C | <u>C</u> GUCC <u>C</u> UCACU <u>U</u> ACUAGUCUGCAGAAGGAGAU                  | U23C_F | GACGTGAGGGGGCAGGGATGGCTATATTTCTGGGAGG <u>C</u> TCCCTCACTTACTAGTCTGCAG |
|      |                                                                             | U23C_R | GGGTATATCTCCTTCTGCAGACTAGTAAGTGAGGGA <u>G</u> CCTCCCAGAAATATAGCCATCC  |
| U23G | <u>G</u> GUCC <u>C</u> UCACU <u>U</u> ACUAGUCUGCAGAAGGAGAU                  | U23G_F | GACGTGAGGGGGCAGGGATGGCTATATTTCTGGGAGG <u>G</u> TCCCTCACTTACTAGTCTGCAG |
|      |                                                                             | U23G_R | GGGTATATCTCCTTCTGCAGACTAGTAAGTGAGGGA <u>C</u> CCTCCCAGAAATATAGCCATCC  |
| U23U | <u>U</u> GUCC <u>C</u> UCACU <u>U</u> ACUAGUCUGCAGAAGGAGAU                  | U23U_F | GACGTGAGGGGGCAGGGATGGCTATATTTCTGGGAGG <u>I</u> TCCCTCACTTACTAGTCTGCAG |
|      |                                                                             | U23U_R | GGGTATATCTCCTTCTGCAGACTAGTAAGTGAGGGA <u>A</u> CCTCCCAGAAATATAGCCATCC  |
| U240 | <u>G</u> GA_C <u>C</u> UCACU <u>U</u> <i>ACUAGUCUGCAG</i> <u>A</u> AGGAGAU  | U240_F | GACGTGAGGGGGCAGGGATGGCTATATTTCTGGGAGGA_CCCTCACTTACTAGTCTGCAG          |
|      |                                                                             | U240_R | GGGTATATCTCCTTCTGCAGACTAGTAAGTGAGGG_TCCCTCCCAGAAATATAGCCATCC          |
| U24A | <u>A</u> GGA <u>C</u> CC <u>C</u> UCACU <u>U</u> ACUAGUCUGCAGAAGGAGAU       | U24A_F | GACGTGAGGGGGCAGGGATGGCTATATTTCTGGGAGGA <u>A</u> CCCTCACTTACTAGTCTGCAG |
|      |                                                                             | U24A_R | GGGTATATCTCCTTCTGCAGACTAGTAAGTGAGGG <u>I</u> TCCCTCCCAGAAATATAGCCATCC |
| U24C | <u>C</u> GGA <u>C</u> CC <u>C</u> UCACU <u>U</u> ACUAGUCUGCAGAAGGAGAU       | U24C_F | GACGTGAGGGGGCAGGGATGGCTATATTTCTGGGAGGA <u>C</u> CCCTCACTTACTAGTCTGCAG |
|      |                                                                             | U24C_R | GGGTATATCTCCTTCTGCAGACTAGTAAGTGAGGG <u>G</u> TCCCTCCCAGAAATATAGCCATCC |
| U24G | <u>G</u> GAG <u>C</u> CC <u>C</u> UCACU <u>U</u> ACUAGUCUGCAGAAGGAGAU       | U24G_F | GACGTGAGGGGGCAGGGATGGCTATATTTCTGGGAGGA <u>G</u> CCCTCACTTACTAGTCTGCAG |
|      |                                                                             | U24G_R | GGGTATATCTCCTTCTGCAGACTAGTAAGTGAGGG <u>C</u> TCCCTCCCAGAAATATAGCCATCC |
| U270 | <u>G</u> GAUCC_ <u>U</u> CACU <u>U</u> <i>ACUAGUCUGCAG</i> <u>A</u> AGGAGAU | U270_F | GGGGGCAGGGATGGCTATATTTCTGGGAGGATCC_TCACTTACTAGTCTGCAGAAGGAG           |
|      |                                                                             | U270_R | CCATGGGTATATCTCCTTCTGCAGACTAGTAAGTGA_GGATCCTCCCAGAAATATAGCC           |
| U27A | <u>A</u> GGAUCC <u>U</u> CACU <u>U</u> ACUAGUCUGCAGAAGGAGAU                 | U27A_F | GGGGGCAGGGATGGCTATATTTCTGGGAGGATCC <u>A</u> TCACTTACTAGTCTGCAGAAGGAG  |
|      |                                                                             | U27A_R | CCATGGGTATATCTCCTTCTGCAGACTAGTAAGTGA <u>I</u> GGATCCTCCCAGAAATATAGCC  |

|    |       |                                                      |         |                                                                       |
|----|-------|------------------------------------------------------|---------|-----------------------------------------------------------------------|
| 45 | U27G  | GGAUCC <b>G</b> UCACUUACUAGUCUGCAGAAGGAGAU           | U27G_F  | GGGGGCAGGGATGGCTATATTTCTGGGAGGATCC <b>G</b> TCACTTACTAGTCTGCAGAAGGAG  |
| 46 |       |                                                      | U27G_R  | CCATGGGTATATCTCCTTCTGCAGACTAGTAAGTGA <b>C</b> GGATCCTCCCAGAAATATAGCC  |
| 47 | U27U  | GGAUCC <b>U</b> UCACUUACUAGUCUGCAGAAGGAGAU           | U27U_F  | GGGGGCAGGGATGGCTATATTTCTGGGAGGATCC <b>I</b> TCACTTACTAGTCTGCAGAAGGAG  |
| 48 |       |                                                      | U27U_R  | CCATGGGTATATCTCCTTCTGCAGACTAGTAAGTGA <b>A</b> GGATCCTCCCAGAAATATAGCC  |
| 49 |       |                                                      |         |                                                                       |
| 50 | U280  | GGAUCCC_CACU <b>U</b> ACUAGUCUGCAG <b>A</b> AGGAGAU  | U280_F  | GGGGGCAGGGATGGCTATATTTCTGGGAGGATCCC_CACTTACTAGTCTGCAGAAGGAGA          |
| 51 |       |                                                      | U280_R  | CTCCATGGGTATATCTCCTTCTGCAGACTAGTAAGTGGGGATCCTCCCAGAAATATAGC           |
| 52 | U28A  | GGAUCCC <b>A</b> CACUACUAGUCUGCAGAAGGAGAU            | U28A_F  | GGGGGCAGGGATGGCTATATTTCTGGGAGGATCCC <b>A</b> CACTTACTAGTCTGCAGAAGGAGA |
| 53 |       |                                                      | U28A_R  | CTCCATGGGTATATCTCCTTCTGCAGACTAGTAAGTGGGGATCCTCCCAGAAATATAGC           |
| 54 | U28C  | GGAUCCC <b>C</b> CACUACUAGUCUGCAGAAGGAGAU            | U28C_F  | GGGGGCAGGGATGGCTATATTTCTGGGAGGATCCC <b>C</b> CACTTACTAGTCTGCAGAAGGAGA |
| 55 |       |                                                      | U28C_R  | CTCCATGGGTATATCTCCTTCTGCAGACTAGTAAGTGGGGATCCTCCCAGAAATATAGC           |
| 56 | U28G  | GGAUCCC <b>G</b> CACUACUAGUCUGCAGAAGGAGAU            | U28G_F  | GGGGGCAGGGATGGCTATATTTCTGGGAGGATCCC <b>G</b> CACTTACTAGTCTGCAGAAGGAGA |
| 57 |       |                                                      | U28G_R  | CTCCATGGGTATATCTCCTTCTGCAGACTAGTAAGTGGGGATCCTCCCAGAAATATAGC           |
| 58 |       |                                                      |         |                                                                       |
| 59 | U290  | GGAUCCCU_ACU <b>U</b> ACUAGUCUGCAG <b>A</b> AGGAGAU  | U290_F  | GGGGCAGGGATGGCTATATTTCTGGGAGGATCCCT_ACTTACTAGTCTGCAGAAGGAGAT          |
| 60 |       |                                                      | U290_R  | CTCCATGGGTATATCTCCTTCTGCAGACTAGTAAGT_AGGGATCCTCCCAGAAATATAGC          |
| 61 | U29A  | GGAUCCCU <b>A</b> ACUACUAGUCUGCAGAAGGAGAU            | U29A_F  | GGGGCAGGGATGGCTATATTTCTGGGAGGATCCCT <b>A</b> ACTTACTAGTCTGCAGAAGGAGAT |
| 62 |       |                                                      | U29A_R  | CTCCATGGGTATATCTCCTTCTGCAGACTAGTAAGT <b>I</b> AGGGATCCTCCCAGAAATATAGC |
| 63 | U29G  | GGAUCCCU <b>G</b> ACUACUAGUCUGCAGAAGGAGAU            | U29G_F  | GGGGCAGGGATGGCTATATTTCTGGGAGGATCCCT <b>G</b> ACTTACTAGTCTGCAGAAGGAGAT |
| 64 |       |                                                      | U29G_R  | CTCCATGGGTATATCTCCTTCTGCAGACTAGTAAGT <b>C</b> AGGGATCCTCCCAGAAATATAGC |
| 65 | U29U  | GGAUCCCU <b>U</b> ACUACUAGUCUGCAGAAGGAGAU            | U29U_F  | GGGGCAGGGATGGCTATATTTCTGGGAGGATCCCT <b>I</b> ACTTACTAGTCTGCAGAAGGAGAT |
| 66 |       |                                                      | U29U_R  | CTCCATGGGTATATCTCCTTCTGCAGACTAGTAAGT <b>A</b> AGGGATCCTCCCAGAAATATAGC |
| 67 |       |                                                      |         |                                                                       |
| 68 | U2110 | GGAUCCCUCA_UU <b>U</b> ACUAGUCUGCAG <b>A</b> AGGAGAU | U2110_F | GATGGCTATATTTCTGGGAGGATCCCTCA_TTACTAGTCTGCAGAAGGAGATATACC             |
| 69 |       |                                                      | U2110_R | CATGGGTATATCTCCTTCTGCAGACTAGTAA_TGAGGGATCCTCCCAGAAATATAG              |
| 70 | U211A | GGAUCCCUCA <b>A</b> UUACUAGUCUGCAGAAGGAGAU           | U211A_F | GATGGCTATATTTCTGGGAGGATCCCTCA <b>A</b> TTACTAGTCTGCAGAAGGAGATATACC    |
| 71 |       |                                                      | U211A_R | CATGGGTATATCTCCTTCTGCAGACTAGTAA <b>U</b> TGAGGGATCCTCCCAGAAATATAG     |
| 72 | U211G | GGAUCCCUCA <b>G</b> UUACUAGUCUGCAGAAGGAGAU           | U211G_F | GATGGCTATATTTCTGGGAGGATCCCTCA <b>G</b> TTACTAGTCTGCAGAAGGAGATATACC    |
| 73 |       |                                                      | U211G_R | CATGGGTATATCTCCTTCTGCAGACTAGTAA <b>C</b> TGAGGGATCCTCCCAGAAATATAG     |
| 74 | U211U | GGAUCCCUCA <b>U</b> UUACUAGUCUGCAGAAGGAGAU           | U211U_F | GATGGCTATATTTCTGGGAGGATCCCTCA <b>I</b> TTACTAGTCTGCAGAAGGAGATATACC    |
| 75 |       |                                                      | U211U_R | CATGGGTATATCTCCTTCTGCAGACTAGTAA <b>A</b> TGAGGGATCCTCCCAGAAATATAG     |
| 76 |       |                                                      |         |                                                                       |
| 77 | U2120 | GGAUCCCUCAC_U <b>U</b> ACUAGUCUGCAG <b>A</b> AGGAGAU | U2120_F | GATGGCTATATTTCTGGGAGGATCCCTCAC_TACTAGTCTGCAGAAGGAGATATACC             |
| 78 |       |                                                      | U2120_R | CATGGGTATATCTCCTTCTGCAGACTAGTA_GTGAGGGATCCTCCCAGAAATATAG              |
| 79 | U212A | GGAUCCCUCAC <b>A</b> UUACUAGUCUGCAGAAGGAGAU          | U212A_F | GATGGCTATATTTCTGGGAGGATCCCTCAC <b>A</b> TACTAGTCTGCAGAAGGAGATATACC    |
| 80 |       |                                                      | U212A_R | CATGGGTATATCTCCTTCTGCAGACTAGTA <b>I</b> GTGAGGGATCCTCCCAGAAATATAG     |
| 81 | U212C | GGAUCCCUCAC <b>C</b> UUACUAGUCUGCAGAAGGAGAU          | U212C_F | GATGGCTATATTTCTGGGAGGATCCCTCAC <b>C</b> TACTAGTCTGCAGAAGGAGATATACC    |
| 82 |       |                                                      | U212C_R | CATGGGTATATCTCCTTCTGCAGACTAGTA <b>G</b> GTGAGGGATCCTCCCAGAAATATAG     |
| 83 | U212G | GGAUCCCUCAC <b>G</b> UUACUAGUCUGCAGAAGGAGAU          | U212G_F | GATGGCTATATTTCTGGGAGGATCCCTCAC <b>G</b> TACTAGTCTGCAGAAGGAGATATACC    |
| 84 |       |                                                      | U212G_R | CATGGGTATATCTCCTTCTGCAGACTAGTA <b>C</b> GTGAGGGATCCTCCCAGAAATATAG     |
| 85 |       |                                                      |         |                                                                       |
| 86 | U2130 | GGAUCCCUCACU_ <b>U</b> ACUAGUCUGCAG <b>A</b> AGGAGAU | U2130_F | GATGGCTATATTTCTGGGAGGATCCCTCACT_ACTAGTCTGCAGAAGGAGATATACC             |
| 87 |       |                                                      | U2130_R | GTGAAAAGCTCCATGGGTATATCTCCTTCTGCAGACTAGT_AGTGAGGGATCCTCCCAG           |

|    |       |                                                           |         |                                                                       |
|----|-------|-----------------------------------------------------------|---------|-----------------------------------------------------------------------|
| 86 | U2130 | GGAUCCCUCACU_ <i>ACUAGUCUGCAG</i> <b>A</b> AGGAGAU        | U2130_F | GATGGCTATATTTCTGGGAGGATCCCTCACT_ ACTAGTCTGCAGAAGGAGATATACC            |
| 87 |       |                                                           | U2130_R | GTGAAAAGCTCCATGGGTATATCTCCTTCTGCAGACTAGT_ AGTGAGGGATCCTCCCAG          |
| 88 | U213A | GGAUCCCUCACU <b>A</b> ACUAGUCUGCAGAAGGAGAU                | U213A_F | GATGGCTATATTTCTGGGAGGATCCCTCACT <b>A</b> ACTAGTCTGCAGAAGGAGATATACC    |
| 89 |       |                                                           | U213A_R | GTGAAAAGCTCCATGGGTATATCTCCTTCTGCAGACTAGT <b>I</b> AGTGAGGGATCCTCCCAG  |
| 90 | U213C | GGAUCCCUCACU <b>C</b> ACUAGUCUGCAGAAGGAGAU                | U213C_F | GATGGCTATATTTCTGGGAGGATCCCTCACT <b>C</b> ACTAGTCTGCAGAAGGAGATATACC    |
| 91 |       |                                                           | U213C_R | GTGAAAAGCTCCATGGGTATATCTCCTTCTGCAGACTAGT <b>G</b> AGTGAGGGATCCTCCCAG  |
| 92 | U213G | GGAUCCCUCACU <b>G</b> ACUAGUCUGCAGAAGGAGAU                | U213G_F | GATGGCTATATTTCTGGGAGGATCCCTCACT <b>G</b> ACTAGTCTGCAGAAGGAGATATACC    |
| 93 |       |                                                           | U213G_R | GTGAAAAGCTCCATGGGTATATCTCCTTCTGCAGACTAGT <b>C</b> AGTGAGGGATCCTCCCAG  |
| 94 |       |                                                           |         |                                                                       |
| 95 | U2150 | GGAUCCCUCACUU <i>A</i> <i>UAGUCUGCAG</i> <b>A</b> AGGAGAU | U2150_F | GGGATGGCTATATTTCTGGGAGGATCCCTCACTTA_ TAGTCTGCAGAAGGAGATATACCC         |
| 96 |       |                                                           | U2150_R | GTGAAAAGCTCCATGGGTATATCTCCTTCTGCAGACTA_ TAAGTGAGGGATCCTCCCAG          |
| 97 | U215A | GGAUCCCUCACUUA <b>A</b> UAGUCUGCAGAAGGAGAU                | U215A_F | GGGATGGCTATATTTCTGGGAGGATCCCTCACTTA <b>A</b> TAGTCTGCAGAAGGAGATATACCC |
| 98 |       |                                                           | U215A_R | GTGAAAAGCTCCATGGGTATATCTCCTTCTGCAGACTA <b>I</b> TAAGTGAGGGATCCTCCCAG  |
| 99 | U215G | GGAUCCCUCACUUA <b>G</b> UAGUCUGCAGAAGGAGAU                | U215G_F | GGGATGGCTATATTTCTGGGAGGATCCCTCACTTA <b>G</b> TAGTCTGCAGAAGGAGATATACCC |
| 00 |       |                                                           | U215G_R | GTGAAAAGCTCCATGGGTATATCTCCTTCTGCAGACTA <b>C</b> TAAGTGAGGGATCCTCCCAG  |
| 01 | U215U | GGAUCCCUCACUUA <b>U</b> UAGUCUGCAGAAGGAGAU                | U215U_F | GGGATGGCTATATTTCTGGGAGGATCCCTCACTTA <b>I</b> TAGTCTGCAGAAGGAGATATACCC |
| 02 |       |                                                           | U215U_R | GTGAAAAGCTCCATGGGTATATCTCCTTCTGCAGACTA <b>A</b> TAAGTGAGGGATCCTCCCAG  |
| 03 |       |                                                           |         |                                                                       |
| 04 | U2160 | GGAUCCCUCACUU <i>AC</i> <i>AGUCUGCAG</i> <b>A</b> AGGAGAU | U2160_F | GGGATGCCTATATTTCTGGGAGGATCCCTCACTTAC_ AGTCTGCAGAAGGAGATATACCC         |
| 05 |       |                                                           | U2160_R | CAGTGAAAAGCTCCATGGGTATATCTCCTTCTGCAGACT_ GTAAGTGAGGGATCCTCCC          |
| 06 | U216A | GGAUCCCUCACUUAC <b>A</b> AGUCUGCAGAAGGAGAU                | U216A_F | GGGATGCCTATATTTCTGGGAGGATCCCTCACTTAC <b>A</b> AGTCTGCAGAAGGAGATATACCC |
| 07 |       |                                                           | U216A_R | CAGTGAAAAGCTCCATGGGTATATCTCCTTCTGCAGACT <b>I</b> GTAAGTGAGGGATCCTCCC  |
| 08 | U216C | GGAUCCCUCACUUAC <b>C</b> AGUCUGCAGAAGGAGAU                | U216C_F | GGGATGCCTATATTTCTGGGAGGATCCCTCACTTAC <b>C</b> AGTCTGCAGAAGGAGATATACCC |
| 09 |       |                                                           | U216C_R | CAGTGAAAAGCTCCATGGGTATATCTCCTTCTGCAGACT <b>G</b> GTAAGTGAGGGATCCTCCC  |
| 10 | U216G | GGAUCCCUCACUUAC <b>G</b> AGUCUGCAGAAGGAGAU                | U216G_F | GGGATGCCTATATTTCTGGGAGGATCCCTCACTTAC <b>G</b> AGTCTGCAGAAGGAGATATACCC |
| 11 |       |                                                           | U216G_R | CAGTGAAAAGCTCCATGGGTATATCTCCTTCTGCAGACT <b>C</b> GTAAGTGAGGGATCCTCCC  |
| 12 |       |                                                           |         |                                                                       |
| 13 | U2240 | GGAUCCCUCACUUACUAGUCUGC_ <b>GA</b> AGGAGAU                | U2240_F | CTATATTTCTGGGAGGATCCCTCACTTACTAGTCTGC_ GAAGGAGATATACCCATGGAGC         |
| 14 |       |                                                           | U2240_R | CGCCAGTGAAAAGCTCCATGGGTATATCTCCTT_ GCAGACTAGTAAGTGAGGGATC             |
| 15 | U224C | GGAUCCCUCACUUACUAGUCUGC <b>C</b> GAAGGAGAU                | U224C_F | CTATATTTCTGGGAGGATCCCTCACTTACTAGTCTGC <b>C</b> GAAGGAGATATACCCATGGAGC |
| 16 |       |                                                           | U224C_R | CGCCAGTGAAAAGCTCCATGGGTATATCTCCTT <b>C</b> GCAGACTAGTAAGTGAGGGATC     |
| 17 | U224G | GGAUCCCUCACUUACUAGUCUGC <b>G</b> GAAGGAGAU                | U224G_F | CTATATTTCTGGGAGGATCCCTCACTTACTAGTCTGC <b>G</b> GAAGGAGATATACCCATGGAGC |
| 18 |       |                                                           | U224G_R | CGCCAGTGAAAAGCTCCATGGGTATATCTCCTT <b>C</b> GCAGACTAGTAAGTGAGGGATC     |
| 19 | U224U | GGAUCCCUCACUUACUAGUCUGC <b>U</b> GAAGGAGAU                | U224U_F | CTATATTTCTGGGAGGATCCCTCACTTACTAGTCTGC <b>I</b> GAAGGAGATATACCCATGGAGC |
| 20 |       |                                                           | U224U_R | CGCCAGTGAAAAGCTCCATGGGTATATCTCCTT <b>C</b> GCAGACTAGTAAGTGAGGGATC     |
| 21 |       |                                                           |         |                                                                       |
| 22 | U2250 | GGAUCCCUCACUUACUAGUCUGCA_ <b>A</b> AGGA GAU               | U2250_F | TATATTTCTGGGAGGATCCCTCACTTACTAGTCTGCA_ AAGGAGATATACCCATGGAGCT         |
| 23 |       |                                                           | U2250_R | CAACGCCAGTGAAAAGCTCCATGGGTATATCTCCTT_ TGCAGACTAGTAAGTGAGGGATC         |
| 24 | U225A | GGAUCCCUCACUUACUAGUCUGCA <b>A</b> AAGGA GAU               | U225A_F | TATATTTCTGGGAGGATCCCTCACTTACTAGTCTGCA <b>A</b> AAGGAGATATACCCATGGAGCT |
| 25 |       |                                                           | U225A_R | CAACGCCAGTGAAAAGCTCCATGGGTATATCTCCTT <b>I</b> TGCAGACTAGTAAGTGAGGGATC |
| 26 | U225C | GGAUCCCUCACUUACUAGUCUGCA <b>C</b> AAGGA GAU               | U225C_F | TATATTTCTGGGAGGATCCCTCACTTACTAGTCTGCA <b>C</b> AAGGAGATATACCCATGGAGCT |
| 27 |       |                                                           | U225C_R | CAACGCCAGTGAAAAGCTCCATGGGTATATCTCCTT <b>G</b> TGCAGACTAGTAAGTGAGGGATC |
| 28 | U225U | GGAUCCCUCACUUACUAGUCUGCA <b>U</b> AAGGA GAU               | U225U_F | TATATTTCTGGGAGGATCCCTCACTTACTAGTCTGCA <b>U</b> AAGGAGATATACCCATGGAGCT |
| 29 |       |                                                           | U225U_R | CAACGCCAGTGAAAAGCTCCATGGGTATATCTCCTT <b>A</b> TGCAGACTAGTAAGTGAGGGATC |

|     |       |                                        |         |                                                                |
|-----|-------|----------------------------------------|---------|----------------------------------------------------------------|
| 122 | U2250 | GGAUCCCUCA CUUACUAGUC UGCA_AAGGA GAU   | U2250_F | TATATTTCTGGGAGGATCCCTCACTTACTAGTCTGCA_AAGGAGATATACCCATGGAGCT   |
| 123 |       |                                        | U2250_R | CAACGCCAGTGAAAAGCTCCATGGGTATATCTCCTT_TGCAGACTAGTAAGTGAGGGATC   |
| 124 | U225A | GGAUCCCUCA CUUACUAGUC UGCA_AAGGA GAU   | U225A_F | TATATTTCTGGGAGGATCCCTCACTTACTAGTCTGCA_AAGGAGATATACCCATGGAGCT   |
| 125 |       |                                        | U225A_R | CAACGCCAGTGAAAAGCTCCATGGGTATATCTCCTT_I TGCAGACTAGTAAGTGAGGGATC |
| 126 | U225C | GGAUCCCUCA CUUACUAGUC UGCA_C AAGGA GAU | U225C_F | TATATTTCTGGGAGGATCCCTCACTTACTAGTCTGCA_C AAGGAGATATACCCATGGAGCT |
| 127 |       |                                        | U225C_R | CAACGCCAGTGAAAAGCTCCATGGGTATATCTCCTT_G TGCAGACTAGTAAGTGAGGGATC |
| 128 | U225U | GGAUCCCUCA CUUACUAGUC UGCA_U AAGGA GAU | U225U_F | TATATTTCTGGGAGGATCCCTCACTTACTAGTCTGCA_U AAGGAGATATACCCATGGAGCT |
| 129 |       |                                        | U225U_R | CAACGCCAGTGAAAAGCTCCATGGGTATATCTCCTT_Δ TGCAGACTAGTAAGTGAGGGATC |
| 130 |       |                                        |         |                                                                |
| 131 | U2340 | GGAUCCCUCA CUUACUAGUC UGCAGAAGGA GAL   | U2340_F | GAGGATCCCTCACTTACTAGTCTGCAGAAGGAGAT_TACCCATGGAGCTTTTCACTG      |
| 132 |       |                                        | U2340_R | GGGAACAACGCCAGTGAAAAGCTCCATGGGTATATCTCCTTCTGCAGACTAGTAAGTG     |
| 133 | U234C | GGAUCCCUCA CUUACUAGUC UGCAGAAGGA GAL   | U234C_F | GAGGATCCCTCACTTACTAGTCTGCAGAAGGAGAT_C TACCCATGGAGCTTTTCACTG    |
| 134 |       |                                        | U234C_R | GGGAACAACGCCAGTGAAAAGCTCCATGGGTAG_ATCTCCTTCTGCAGACTAGTAAGTG    |
| 135 | U234G | GGAUCCCUCA CUUACUAGUC UGCAGAAGGA GAL   | U234G_F | GAGGATCCCTCACTTACTAGTCTGCAGAAGGAGAT_G TACCCATGGAGCTTTTCACTG    |
| 136 |       |                                        | U234G_R | GGGAACAACGCCAGTGAAAAGCTCCATGGGTAC_ATCTCCTTCTGCAGACTAGTAAGTG    |
| 137 | U234U | GGAUCCCUCA CUUACUAGUC UGCAGAAGGA GAL   | U234U_F | GAGGATCCCTCACTTACTAGTCTGCAGAAGGAGAT_U TACCCATGGAGCTTTTCACTG    |
| 138 |       |                                        | U234U_R | GGGAACAACGCCAGTGAAAAGCTCCATGGGTAA_Δ ATCTCCTTCTGCAGACTAGTAAGTG  |
| 139 |       |                                        |         |                                                                |
| 140 | U2350 | GGAUCCCUCA CUUACUAGUC UGCAGAAGGA GAL   | U2350_F | GATCCCTCACTTACTAGTCTGCAGAAGGAGATA_ACCCATGGAGCTTTTCACTG         |
| 141 |       |                                        | U2350_R | GGGAACAACGCCAGTGAAAAGCTCCATGGGT_TATCTCCTTCTGCAGACTAGTAAGTG     |
| 142 | U235A | GGAUCCCUCA CUUACUAGUC UGCAGAAGGA GAL   | U235A_F | GATCCCTCACTTACTAGTCTGCAGAAGGAGATA_Δ ACCCATGGAGCTTTTCACTG       |
| 143 |       |                                        | U235A_R | GGGAACAACGCCAGTGAAAAGCTCCATGGGT_I TATCTCCTTCTGCAGACTAGTAAGTG   |
| 144 | U235C | GGAUCCCUCA CUUACUAGUC UGCAGAAGGA GAL   | U235C_F | GATCCCTCACTTACTAGTCTGCAGAAGGAGATA_C ACCCATGGAGCTTTTCACTG       |
| 145 |       |                                        | U235C_R | GGGAACAACGCCAGTGAAAAGCTCCATGGGT_G TATCTCCTTCTGCAGACTAGTAAGTG   |
| 146 | U235G | GGAUCCCUCA CUUACUAGUC UGCAGAAGGA GAL   | U235G_F | GATCCCTCACTTACTAGTCTGCAGAAGGAGATA_G ACCCATGGAGCTTTTCACTG       |
| 147 |       |                                        | U235G_R | GGGAACAACGCCAGTGAAAAGCTCCATGGGT_C TATCTCCTTCTGCAGACTAGTAAGTG   |
| 148 |       |                                        |         |                                                                |
| 149 | U2370 | GGAUCCCUCA CUUACUAGUC UGCAGAAGGA GAL   | U2370_F | GATCCCTCACTTACTAGTCTGCAGAAGGAGATATA_CCATGGAGCTTTTCACTGGC       |
| 150 |       |                                        | U2370_R | GGGAACAACGCCAGTGAAAAGCTCCATGG_TATATCTCCTTCTGCAGACTAGTAAGTG     |
| 151 | U237A | GGAUCCCUCA CUUACUAGUC UGCAGAAGGA GAL   | U237A_F | GATCCCTCACTTACTAGTCTGCAGAAGGAGATATA_Δ CCATGGAGCTTTTCACTGGC     |
| 152 |       |                                        | U237A_R | GGGAACAACGCCAGTGAAAAGCTCCATGG_I TATATCTCCTTCTGCAGACTAGTAAGTG   |
| 153 | U237G | GGAUCCCUCA CUUACUAGUC UGCAGAAGGA GAL   | U237G_F | GATCCCTCACTTACTAGTCTGCAGAAGGAGATATA_G CCATGGAGCTTTTCACTGGC     |
| 154 |       |                                        | U237G_R | GGGAACAACGCCAGTGAAAAGCTCCATGG_C TATATCTCCTTCTGCAGACTAGTAAGTG   |
| 155 | U237U | GGAUCCCUCA CUUACUAGUC UGCAGAAGGA GAL   | U237U_F | GATCCCTCACTTACTAGTCTGCAGAAGGAGATATA_I CCATGGAGCTTTTCACTGGC     |
| 156 |       |                                        | U237U_R | GGGAACAACGCCAGTGAAAAGCTCCATGG_Δ TATATCTCCTTCTGCAGACTAGTAAGTG   |
| 157 |       |                                        |         |                                                                |
| 158 | U2380 | GGAUCCCUCA CUUACUAGUC UGCAGAAGGA GAL   | U2380_F | GATCCCTCACTTACTAGTCTGCAGAAGGAGATATAC_CATGGAGCTTTTCACTGGCG      |
| 159 |       |                                        | U2380_R | ATGGGAACAACGCCAGTGAAAAGCTCCATG_GTATATCTCCTTCTGCAGACTAGTAAG     |
| 160 | U238A | GGAUCCCUCA CUUACUAGUC UGCAGAAGGA GAL   | U238A_F | GATCCCTCACTTACTAGTCTGCAGAAGGAGATATAC_Δ CATGGAGCTTTTCACTGGCG    |
| 161 |       |                                        | U238A_R | ATGGGAACAACGCCAGTGAAAAGCTCCATG_I GTATATCTCCTTCTGCAGACTAGTAAG   |
| 162 | U238G | GGAUCCCUCA CUUACUAGUC UGCAGAAGGA GAL   | U238C_F | GATCCCTCACTTACTAGTCTGCAGAAGGAGATATAC_G CATGGAGCTTTTCACTGGCG    |
| 163 |       |                                        | U238C_R | ATGGGAACAACGCCAGTGAAAAGCTCCATG_C GTATATCTCCTTCTGCAGACTAGTAAG   |
| 164 | U238U | GGAUCCCUCA CUUACUAGUC UGCAGAAGGA GAL   | U238G_F | GATCCCTCACTTACTAGTCTGCAGAAGGAGATATAC_I CATGGAGCTTTTCACTGGCG    |
| 165 |       |                                        | U238G_R | ATGGGAACAACGCCAGTGAAAAGCTCCATG_Δ GTATATCTCCTTCTGCAGACTAGTAAG   |



|     |            |                                     |         |                                                                |
|-----|------------|-------------------------------------|---------|----------------------------------------------------------------|
| 167 | U2100 (U9) | GGAUCCUC_CUU ACUAGUCUGCAG AAGGAGAU  | U2100_F | CAGGGATGGI TATATTTCTGGGAGGATCCCTC_CTTACTAGTCTGCAGAAGGAGATATAC  |
| 168 |            |                                     | U2100_R | CTCCATGGGTATATCTCCTTCTGCAGACTAGTAAG_GAGGGATCCTCCCAGAAATATAGC   |
| 169 | U210C      | GGAUCCUC_CCUU ACUAGUCUGCAG AAGGAGAU | U210C_F | CAGGGATGGCTATATTTCTGGGAGGATCCCTC_CTTACTAGTCTGCAGAAGGAGATATAC   |
| 170 |            |                                     | U210C_R | CTCCATGGGTATATCTCCTTCTGCAGACTAGTAAG_GAGGGATCCTCCCAGAAATATAGC   |
| 171 | U210G      | GGAUCCUC_GCUU ACUAGUCUGCAG AAGGAGAU | U210G_F | CAGGGATGGCTATATTTCTGGGAGGATCCCTC_GTTACTAGTCTGCAGAAGGAGATATAC   |
| 172 |            |                                     | U210G_R | CTCCATGGGTATATCTCCTTCTGCAGACTAGTAAG_GAGGGATCCTCCCAGAAATATAGC   |
| 173 | U210U      | GGAUCCUC_UCUU ACUAGUCUGCAG AAGGAGAU | U210U_F | CAGGGATGGCTATATTTCTGGGAGGATCCCTC_I CTTACTAGTCTGCAGAAGGAGATATAC |
| 174 |            |                                     | U210U_R | CTCCATGGGTATATCTCCTTCTGCAGACTAGTAAG_A GAGGGATCCTCCCAGAAATATAGC |
